# Supplementary material for: Glutathionylation of fibronectin records mechanical history, priming an integrin switch and myofibroblast polarization
Source: Research Square preprint supplement (doi:10.21203/rs.3.rs-468701/v1), 2021-05-11
Supplement: Supplementary file 1 [file 0cbecdc55ae426f94fbdcfc9.xlsx]

## Sheet: Fig. 1e
	Tumor lung		Normal lung
	Median	Average	Median	Average
	3.1667	3.1472	0.7071	0.8539
	1.5045	1.7617	0.5074	0.6131
	3.1139	3.2724	0.4948	0.5789
	3.285	3.544	0.5862	0.7059
	1.7581	2.0454	0.6366	0.7402
	3.6398	3.8661	0.9559	1.0875
	3.1022	3.3332	0.72	0.7873
	1.2776	1.3614	0.8567	1.0326
	1.8491	1.986	0.6578	0.7544
	3.148	3.3877	1.3358	1.4776
	0.963	1.0482	0.4842	0.5388
	0.556	0.6837	0.5953	0.658
	0.9681	1.1829	0.5464	0.6281
	0.9957	1.1892	0.342	0.3963
	1.4641	1.7138	0.7274	0.8243
	1.3817	1.7059	0.6444	0.7495
	2.0649	2.6058	0.7482	0.8453
	3.3269	3.4771	0.6485	0.7687
	4.4776	4.5059	0.6013	0.6823
	1.7829	2.1205	0.6444	0.7247
	1.0303	1.1752	0.6213	0.7374
	0.5049	0.598	0.6792	0.7596
	0.744	0.8603	0.6021	0.7134
			0.7413	0.8454

## Sheet: Fig. 1f
	aGlu on IPF		aGlu on NL (I)
	Median	Average	Median	Average
	2.0377	2.2472	0.93	1.0323
	1.877	2.0373	0.813	0.9099
	2.028	2.2249	0.9355	1.0759
	1.0452	1.1665	0.9136	1.0665
	2.0839	2.265	0.9998	1.1082
	1.5413	1.7021	1.3784	1.4626
	1.5961	1.7826	1.3636	1.4674
	1.4457	1.6339	1.2035	1.3063
	1.6474	1.8565	0.8925	0.9689
	1.2146	1.3581	1.162	1.2806
	1.5555	1.7466	1.2734	1.3807
	1.4031	1.5956	1.1727	1.2829
	1.4572	1.6378	1.368	1.5072
	1.0709	1.1976	1.1006	1.2084
	1.402	1.5705	1.7656	1.9146
	1.0452	1.148	2.0597	2.2471
	1.2233	1.403	1.6276	1.7711
	1.5002	1.6721	0.9161	1.0528
	0.9798	1.1032	1.3044	1.4491
	1.0534	1.2364	1.3571	1.5236
	0.5028	0.5718	1.3335	1.526

## Sheet: Fig. 2a
SSG:Fn ratio (FITC:AF555)	λ=1.0	λ=2.0
	0.9838	1.08
	0.8942	1.0601
	0.9375	1.0991
	0.9782	0.9392
	0.9478	0.9564
	0.9457	1.0588
	0.9271	1.0935
	0.9859	1.0755
	1.0264	1.0012
	0.9155	1.0218
	0.9459	1.0402
	1.0135	1.0416
	1.0407	1.1928
	1.0308	1.1405
	0.9727	1.1015
	1.0126	1.0428
	1.0449	1.0588
	0.9869	1.2447
	0.9118	1.1166
	0.8874

## Sheet: Fig. 3c
Strain (X-axis)	Stress (Y-axis)
	Fn																						GSSG
0.000717																							14123	62574	-18554	90752	142650	160210	66288	-58016	99546	94463	-22344	-79096	-57812	49099	90904	-481.8	45325	-18592	15353	14249	-34481	-23926	-81642
0.000744																							13750	66378	5619.7	87099	140420	159920	63086	-51339	94120	96177	-16173	-75847	-57491	52521	92845	-2885.1	47394	-19057	17530	14540	-37123	-24386	-79630
0.000765																							10707	70256	23090	87037	136960	158380	67703	-48843	98326	81912	-13037	-75212	-56203	48016	85659	-1360	45519	-22380	14126	18883	-31442	-23388	-78421
0.000782																							11849	64793	-44824	87330	137260	159460	66097	-50304	94525	82431	-14211	-78061	-54023	51450	91541	1306.6	44923	-18898	17454	18297	-33807	-25981	-80652
0.00081																							15168	63317	-54611	85918	141470	158420	62750	-47268	93675	96834	-12485	-73812	-53524	51053	85827	-758.51	47480	-19888	11867	15472	-34895	-22004	-77149
0.000828																							20545	61904	-56599	81391	137410	157610	61650	-48142	93322	85353	-8166.2	-72524	-52971	48457	83896	3594.7	42823	-22411	14764	16779	-30620	-24925	-79265
0.000857																							23282	63688	-72106	82457	138930	151350	64048	-39704	93029	72149	-9860.8	-68740	-48454	52942	87122	523.26	44518	-24305	15619	14498	-26651	-26942	-79068
0.000877																							26931	62441	-63521	82703	136690	151410	66931	-43212	88966	67166	-11675	-68789	-46170	52206	83841	4314.7	43660	-28159	14676	16800	-32059	-23911	-64804
0.0009																							31523	64544	-73523	82905	132100	149750	63141	-45407	94721	56685	-13978	-66262	-47590	50561	85353	1925	44909	-24057	20980	12096	-15030	-20165	-72227
0.00093																							26610	61985	-96910	83054	136560	143180	64400	-36812	88571	56335	-7540.5	-62397	-46545	50152	82689	2718.8	42583	-28278	17468	14900	-15514	-20988	-70631
0.000949																							33179	62983	-109340	77583	136730	139100	63833	-39769	90170	52175	-8532.5	-64823	-46847	47632	75178	4180.3	45463	-25901	16012	18486	-8792.6	-20507	-68805
0.000971																							37054	59859	-94654	86622	133910	135910	61703	-42627	87571	50892	-10613	-61242	-42852	51167	74828	660.78	42812	-27382	17938	19534	-8976.7	-24021	-61747
0.001005																							47167	61057	-90237	80407	131240	138600	61689	-38878	87959	49418	-6546.6	-63927	-41157	47064	74161	878.67	48648	-24278	20292	16751	-1886.9	-21862	-60151
0.001022																							55999	60447	-115600	78638	127980	131890	61778	-37481	85288	33228	-7588.7	-62346	-40131	48064	76116	5103.3	43715	-23434	22735	14390	125.19	-18164	-53416
0.001055																							57339	66965	-118510	80709	133120	133920	62670	-34482	85981	34889	-6080	-60137	-38203	44180	74306	1852.4	36468	-21757	24801	16547	986.41	-18755	-52194
0.001074																							50569	62078	-118010	84079	130900	133490	60757	-39218	85263	29706	-6930.6	-58667	-41494	46369	73551	3750.6	38656	-21381	25231	15435	11675	-18209	-44803
0.001099																							63884	59362	-108000	80338	131170	129320	64677	-37372	85421	22086	-6270.3	-60419	-38235	44652	71315	4787	42575	-24386	22151	19018	14908	-21855	-49902
0.001136																							61806	62989	-115610	77031	130490	126980	63303	-35984	83803	16761	-5707.8	-57841	-36497	44922	69845	5429.5	42604	-25213	23578	15015	14334	-18558	-44314
0.001155																							73294	62002	-112600	70538	132400	122700	63254	-37446	84718	20376	-5046.4	-53294	-39330	45535	66495	5277.5	38790	-22063	19482	17022	22683	-21561	-48801
0.001177																							77854	59956	-116980	74766	133030	120860	68437	-35202	85072	21033	-5678.5	-55789	-39404	46200	69474	5314.4	42506	-18086	25139	12377	23489	-17568	-44507
0.001214																							79759	61021	-129650	73615	127250	130550	59895	-30674	84244	22707	-4075.1	-51672	-35736	46320	68454	6219.3	37038	-22001	24501	17038	28484	-20114	-33952
0.001236																							74791	57465	-145320	74489	128400	126270	61794	-32747	84701	12183	-2411.6	-52846	-34979	48271	65856	5026	42687	-18262	23780	13158	28978	-16162	-38474
0.001273																							83816	60279	-157550	67054	127310	116320	64856	-35633	78473	5872.2	-1180.6	-47515	-31386	43207	65783	7097	39850	-15681	27551	18355	33558	-16741	-33093
0.001297																							82964	62225	-125770	66871	125940	117510	63152	-28300	79536	6246.9	-1619.7	-48174	-32804	48032	63658	8091.3	37803	-16444	25425	10262	32991	-14518	-32537
0.001322																							66843	64701	-123330	60330	126220	122700	63734	-31746	78775	2319.7	-3398.4	-48212	-36056	45373	58346	10484	40861	-19097	29506	14198	42012	-18902	-30286
0.001359																							70062	57071	-134890	53308	121420	122980	62200	-29749	81376	-5713.8	-1956.8	-46593	-32549	44553	62582	6184.3	37503	-13078	28782	11058	43235	-12930	-22232
0.001388																							78785	64296	-119190	48611	122800	120970	62252	-31682	80420	-16621	-3570.1	-44663	-30099	43458	53081	7514.3	36264	-14301	26534	10934	47621	-13808	-25670
0.001432																							84239	56143	-109420	40109	124510	116430	61333	-25619	79365	-22538	-4575.3	-45981	-34762	43675	50963	11479	35703	-9767.3	30375	10527	57156	-12075	-24048
0.001451																							85585	62122	-97747	36144	126120	118400	58764	-23493	78835	-32861	-1095.6	-51372	-31719	45002	52003	8989.1	37160	-13347	28023	10359	58386	-11791	-22737
0.001477																							82133	61540	-104130	35909	127000	115140	54399	-24311	80674	-28188	41.335	-46943	-33637	45250	51770	7962.3	39962	-9795.3	31355	12956	65226	-11243	-22320
0.001516																							94069	58993	-110660	35357	128960	120560	53673	-25659	79408	-30955	-1346.3	-45345	-35559	41155	50755	9302.6	33037	-8287.5	31166	14398	76806	-11970	-19537
0.00154																							88566	57816	-100690	37247	127010	118080	57927	-24528	79787	-37318	-2217.2	-44693	-31935	42858	49219	6901.7	34182	-7126.6	32084	10229	78714	-9924.7	-24158
0.001565																							93958	56505	-101110	32058	125150	111970	57092	-26096	78599	-42725	660.44	-45723	-32040	44855	44441	10161	36308	-2117.5	37198	12149	78286	-8122.1	-11210
0.00161																							96414	58594	-89728	31181	123990	110950	58883	-28043	78849	-30778	575.3	-38411	-32173	42606	42584	11155	38508	-6549.3	36649	12380	83167	-6843.5	-11121
0.001638																							95584	55457	-75692	31142	126470	114200	57977	-23297	76392	-42799	963.83	-43194	-31322	44961	42304	9119	35635	-6469.4	36472	14647	83502	-6840.5	-15670
0.00168																							95647	57567	-68887	20451	127100	108720	58313	-24015	78173	-45369	1569.7	-40912	-33167	43590	45961	9557.4	41030	-4460.1	37266	15172	87484	-5395.5	-17925
0.001708																							96879	58300	-70474	19336	124050	108830	57365	-23866	77925	-46116	3959.9	-40060	-32467	44284	44313	9471.1	40416	-3537.5	37348	15414	85123	-1361.3	-14973
0.001732																							99411	56113	-67479	15407	129350	108980	54930	-23726	76342	-39906	1451.6	-40714	-31126	43089	42916	13212	41067	-1169.8	39429	16295	81736	-5523.7	-14103
0.001777																							106330	54276	-65441	11285	124840	107560	55995	-22161	78573	-46306	-751.1	-36978	-30660	42928	41480	13259	42638	629.71	39586	15739	80300	-4721.4	-10872
0.001805																							101840	55811	-64394	11944	126250	112530	52204	-23248	76148	-51294	-1984.9	-39295	-29248	40330	35948	13956	41169	-5441.6	40093	17629	74619	-6601.2	-15845
0.001834																							100640	53958	-68238	10801	128580	109200	51678	-24044	79622	-47602	979.86	-38066	-30544	44481	37745	16448	36585	-3600.6	37410	17085	69588	-5631	-9209.1
0.001885																							104790	56939	-62052	6811.5	124240	107530	53020	-17540	73489	-46108	-50.034	-35245	-31804	43794	33458	13981	41662	-2874.4	43680	18718	64483	-7006.1	-5744.6
0.001911																							107750	56094	-56046	6420.3	124100	106870	49913	-23637	77650	-47509	-1605.1	-37499	-28870	42301	32957	13727	36993	-3996.1	39839	18597	61057	-5025.5	-5121.2
0.001956																							118690	52882	-58376	1618.7	123230	106440	48853	-17162	77629	-45151	-3085.5	-35216	-31643	43126	31826	11231	35274	-4093.4	38802	22424	58210	-5141.8	586.3
0.001984																							123430	53967	-61187	2250.5	121050	102910	47877	-16974	75357	-46472	-1492	-32249	-24779	44594	31294	14644	33642	-3102.6	39243	24447	55040	-5917.3	1157.5
0.00201																							125580	56004	-55916	2164	121540	97635	51165	-21637	76790	-42644	-2146	-35029	-28945	42942	29928	15458	34109	-2496	41156	25541	48947	-7707	3661.5
0.002058																							128510	60497	-54821	-397.1	119730	96252	53774	-18189	77261	-42608	-4083.2	-36182	-32952	43348	29559	14278	34837	-1329.5	38890	26013	47086	-9932.2	6891.5
0.002084																							125820	52376	-57438	-1792.1	120830	91975	54476	-15978	77876	-34734	-3067.6	-33805	-29204	41991	31526	13797	34624	-3518.1	42418	26417	46060	-5119.9	6334.4
0.002116																							120260	53052	-56145	-3149.1	120340	94604	54579	-13808	77841	-34625	-3507	-31327	-29436	44985	32652	11686	36975	1733.6	42320	26377	41787	-5832.2	5889.2
0.002168																							123970	55570	-61364	-4921.5	117360	97370	53544	-17356	75129	-35705	-2150.8	-31429	-27480	39500	29737	14894	33163	561.99	42581	30057	35491	-5551.8	7819.1
0.002194																							124280	52865	-59648	-3906.9	119360	98602	54408	-13819	77000	-33799	-2564.3	-32671	-28740	41513	31787	12463	33094	3670.4	39159	34945	34008	-4771.4	9647.4
0.002224																							120850	54414	-61326	-2522.2	121510	96805	57335	-16102	77118	-41892	-1016.7	-30858	-23671	41210	32564	16180	35638	2487.7	43780	39629	33665	-6036.5	11398
0.002275																							114680	53611	-57906	-4088.1	118040	94885	54657	-16561	72973	-36164	708.31	-31876	-25558	40382	28678	15665	35832	896.67	45809	37222	34511	-1466.3	9925.5
0.002306																							123190	56839	-60354	-3611.4	117520	100950	58923	-17635	74247	-36735	946.99	-29210	-25280	41951	33011	13112	36101	6071.1	46151	41812	31814	216.92	10871
0.002359																							108150	53274	-65209	-128.83	116330	92115	56358	-13919	72683	-31247	3727.7	-28574	-25037	40200	32222	14428	34648	6233.1	48075	41034	28250	-1221	14405
0.00239																							108860	55083	-62465	-321	113120	95038	59950	-15600	74350	-31404	2760.5	-27880	-22467	42132	28356	14699	33686	6891.9	50759	45294	32622	1038.2	17237
0.002419																							111080	51816	-62586	1166.7	112790	93811	56314	-13983	74045	-25234	4187.8	-28898	-18120	42769	30055	13900	35715	2430.5	52698	45561	31348	-2273.1	17909
0.002478																							110910	54048	-61385	2502.4	116370	90043	60474	-16925	74096	-26179	4947.6	-31520	-20968	41376	28403	16281	35382	5661.9	53552	48740	31557	2749.8	16278
0.002511																							108690	57092	-56516	1604.9	112890	88723	60592	-14103	73854	-26560	4293.7	-26721	-15062	41537	28805	19418	35211	7532	51608	49550	33611	3033.4	18347
0.002542																							111600	51448	-51465	3262.5	116260	89584	60043	-13701	72502	-25951	5730.7	-27307	-16127	41118	31887	14691	34280	9638.1	49633	50304	35860	3523.5	18546
0.002594																							103260	55444	-46973	3340.7	111720	89150	63373	-13665	73104	-16519	8359	-27212	-16436	41823	30625	15566	33957	11402	53275	50672	39391	1580.5	20201
0.002627																							102530	51122	-42616	5793.4	115220	88784	60509	-16100	75110	-17022	9919.9	-24793	-13622	42388	29101	16585	33279	9399.6	51523	54601	36018	948.6	20496
0.002686																							108810	51384	-55314	6116.2	113000	90870	65636	-11387	73302	-24233	7882.8	-26938	-12357	45189	26505	15710	33907	11139	50151	56126	36625	5362.2	21221
0.002722																							98752	49324	-50837	8562.2	113620	85040	64636	-11131	76324	-24901	10718	-25501	-13508	42735	27408	14682	33510	9081.5	53909	55735	38637	652.83	18202
0.002751																							93855	48012	-50555	7985.8	114020	89501	66468	-11777	74064	-23918	10653	-25805	-16531	41330	32706	18824	33593	10363	56096	55902	40663	1382.5	20210
0.002815																							89216	49498	-53150	11788	110860	85278	66610	-13185	73741	-36608	12712	-25103	-10458	39952	28365	14637	31992	9669.8	56831	57814	40599	-278.12	20756
0.002848																							82370	51626	-49775	13600	110960	85031	69099	-12621	72486	-39070	12337	-23855	-8096.6	42225	29612	14671	36224	13423	56366	56770	42892	1452.4	18976
0.002907																							85131	50135	-40423	15959	112750	82749	73134	-10103	70428	-40467	10698	-23097	-8338.3	41507	29970	16151	34940	15428	57445	51477	46668	801.55	17502
0.002943																							82878	48436	-38141	18357	110800	83551	68634	-12567	71991	-41285	13562	-23993	-6516.2	43107	27913	16140	34350	13885	55966	55034	45200	702.51	17083
0.002978																							79964	50158	-33157	16757	112520	85139	72415	-9287.8	73687	-41859	13669	-23948	-6548.8	41962	24713	15420	32028	14678	56425	52886	42579	977.97	18559
0.003041																							78734	51285	-28296	20092	109340	87701	74668	-11659	75002	-39997	16532	-21949	-7358.8	40065	28652	17465	31740	18042	56897	51961	43957	1281.4	21879
0.003078																							68916	49674	-31572	18043	109800	85232	77696	-9081.5	75045	-37102	14732	-17870	-5020.7	39050	26665	18279	33046	17944	53325	53669	44809	3708.8	24609
0.003107																							57733	51736	-15420	21277	111460	84020	74743	-8483.2	71650	-36152	17272	-22060	-5985.7	40847	33536	18320	34337	16150	59150	50956	42371	5496.5	23081
0.003172																							59650	48619	-19364	21741	108900	83831	72989	-11601	72947	-42162	19603	-20271	-6799.3	42230	28806	17724	32171	16112	60942	46807	45707	3110.6	24462
0.003214																							60561	52548	-16636	22775	110220	86112	80084	-6131.3	74317	-40173	19673	-19028	-6247.5	40717	31313	19945	32403	17491	58432	47071	43447	2379.6	27640
0.003273																							56751	49053	-20910	25450	108250	85441	82808	-6253.8	73405	-38027	17363	-17379	-4737.8	42251	30763	20690	32305	17817	60649	47164	44824	5111.2	28675
0.003309																							42704	50997	-19468	25285	107920	86440	85056	-5212.2	72588	-37446	15704	-17912	-5560.2	40104	34238	16256	32691	21029	61526	42699	40297	2411.8	30916
0.003348																							39334	47534	-18242	30016	107030	85685	85083	-6556	71200	-35425	16175	-16535	-4822.1	38422	31573	18937	31853	22278	60767	44003	39574	3873.6	33074
0.003414																							44222	51592	-27060	30433	108260	82797	85835	-4834.3	71932	-35010	16886	-16469	-5315.9	41029	30141	17435	33643	22213	62158	38752	36875	4046.6	27569
0.003446																							35981	48748	-28951	33696	106390	86576	86878	-5133.5	74985	-35497	17651	-15742	-7659.2	41127	31304	19022	31312	21640	64581	36508	37405	6632.6	30169
0.003485																							29005	50845	-21982	31158	110460	81159	82838	-6611.9	72516	-35525	15892	-13732	-8822.3	42932	32791	19714	30714	23118	63579	33533	38427	5937.8	27279
0.003554																							33245	46931	-22260	31717	106350	82613	83338	-3855.4	71074	-37916	17502	-17773	-13145	40202	32245	21177	32495	21684	65825	31293	34156	5568.6	26125
0.00359																							30471	48609	-25346	34661	106780	84805	74607	-3456.9	72615	-37558	14754	-16149	-13853	41452	32341	18740	31457	22094	66478	31393	34867	8192.2	25666
0.003655																							25406	46067	-25712	31799	106560	82317	73106	-3996.7	70166	-38411	17169	-12617	-14371	39987	37684	21571	33384	22197	65503	30128	32699	7059	25495
0.003698																							29189	46355	-31769	33945	104630	81963	67047	-3098.6	74465	-38691	14792	-11367	-13133	41680	39074	21326	32529	22898	68837	28533	33287	7521.3	25547
0.00374																							26339	48479	-31230	31607	105900	87023	65204	-4181.1	72869	-36884	14625	-13249	-12379	37450	38278	20456	28888	20627	69979	26551	36787	8390.8	25213
0.003822																							17520	45855	-33318	35284	106440	82723	62106	-5619.2	74708	-38084	16034	-14724	-12218	39774	40160	19219	32048	22197	68923	26214	35264	11547	24173
0.003853	788890	-91909	306330	747390	213740	203180	411290	229430	654230	467250	426910	508760	243280	630310	286420	349560	119110	12344	25234	316090	-38357
0.003859																							14541	49002	-35009	37504	104910	81362	63321	-4252.5	72682	-39053	14052	-12475	-11053	37463	41377	23104	31811	24237	69918	22161	32780	12116	24161
0.003928																							2380.9	46663	-40377	35132	103280	83836	59176	-1187.4	74799	-39877	14729	-15493	-7408.4	40240	44716	21696	29878	24416	69653	17942	32351	10910	26509
0.003935	812160	-71133	305160	753430	212470	213400	422970	241060	651910	465360	427310	516660	241030	663080	279000	340950	123560	15796	27045	314400	-28680
0.003963																							1299.5	45490	-44094	41410	102680	86284	61050	-4356.2	72654	-37021	16265	-11532	-7064.4	40726	43692	20402	30108	24283	67931	18878	31212	13604	27502
0.004005																							189.06	47600	-48302	40430	103600	83864	58712	-3521	74758	-39532	16040	-12445	-7755.8	40066	46062	20624	32235	24224	68388	19417	32615	13182	28967
0.004063	836660	-72648	300520	757370	215570	218250	412860	243920	646320	466350	434930	512820	242600	669760	279880	354890	119630	20515	32138	312820	-22157
0.004075																							-1695.6	48269	-58107	41954	102410	83924	60008	-4660.1	74253	-40964	16241	-11332	-6677	40982	45282	19484	33620	25918	68861	18031	31310	14160	29947
0.004113																							-563.32	48735	-61744	40833	101910	82255	58647	-1062.4	73221	-42453	15340	-12923	-5247.2	40888	46224	18620	33041	23207	69566	14255	32188	15357	29670
0.004133	848280	-75676	308640	762520	205770	212350	423930	236530	653860	440630	430140	509970	248460	696990	272790	349830	118890	20222	30035	315810	-10563
0.004157																							-7390.7	46675	-62732	37990	103000	80117	56318	-293.3	74028	-39297	13728	-11294	-6484.1	40301	49118	23204	31743	24820	68137	13155	35702	15376	30247
0.004223																							-3836.7	45774	-67086	40545	102050	78415	59993	-212.76	76201	-42241	15656	-10535	-9102.2	40248	46284	21620	32758	24927	68199	7220.8	32110	13555	32333
0.004252	838380	-49724	311470	756780	206310	212580	423800	242390	658260	424680	437530	510790	267380	705480	275340	355700	121040	16134	31381	313160	-10455
0.004264																							-13629	48569	-74293	40118	101310	80836	58025	-2173.5	74771	-42270	15469	-9477.3	-8920.9	38427	45612	21996	33081	26035	68117	6909.4	36125	15806	20769
0.004333	829380	-48023	303270	756940	210700	212240	431860	251130	650270	416120	441790	515040	275990	741560	275100	356130	126820	22109	31627	305410	-3465.5
0.004342																							-22596	45450	-76588	43027	101830	81163	58182	-3402.1	73228	-42261	15780	-11001	-14646	40623	47698	25177	33746	29315	67863	2974.4	35204	17300	20010
0.004385																							-26010	46410	-83780	40339	101550	80491	59243	-3610.6	71986	-42303	15032	-8639.2	-13426	39388	47162	22296	29591	28581	69533	2576.8	35579	18965	21081
0.004413	860110	-45237	307130	766720	215350	210400	434950	252170	639680	427510	443540	515610	268020	749070	271580	351590	145490	20884	32490	308460	3079.4
0.004424																							-34769	45109	-92936	41302	100620	82281	57779	-334.5	70606	-39952	13933	-9674.1	-14501	40197	48207	21676	31299	29648	64463	-1782.4	34835	16239	18961
0.004503																							-39017	48495	-89963	43116	99021	82558	55768	-584.2	72272	-40034	13987	-9336.6	-11855	37686	50229	23890	29938	27220	66807	-3261.4	35359	15557	20288
0.004535	878720	-45148	316630	767940	211000	213420	436580	244090	643460	417440	448560	522540	273480	765590	276700	356360	157980	25023	37034	313290	14047
0.004546																							-36134	45444	-87181	41098	100860	80697	61261	253.81	71162	-38316	14124	-8437.7	-3202.9	39953	50016	23838	28908	27033	64279	-1581.6	32811	14840	19041
0.004585																							-37352	46458	-91575	44497	99290	81351	60330	-1473.1	72475	-39096	16215	-8235.8	713.9	38831	50585	24749	28797	28754	65640	-4126.7	32907	16762	19095
0.004616	897180	-43440	318570	769890	217000	226230	443240	249840	642160	419320	447280	513750	278300	764090	272900	349110	181430	24659	41953	321540	17722
0.004653																							-35273	45614	-98093	44621	100860	81559	59051	529.77	74134	-40042	13295	-8747.2	3001.2	38801	53014	24398	32907	30072	62147	-3789.8	36350	14979	21809
0.004702																							-36475	44452	-105500	47096	97928	81658	61902	25.117	75128	-39018	13340	-9603	9133.7	38539	52438	25403	31178	30343	62802	-4648.1	33366	14024	19532
0.004744																							-37871	48756	-108850	45321	100770	82651	61622	-1613.6	72188	-38401	11883	-9283.6	12889	40611	53555	24324	31575	29337	62334	-5458.4	33415	13047	20301
0.004749	923280	-27038	320000	772370	217420	221940	438720	251490	646290	427000	458700	518470	296200	780610	268490	352580	182390	25894	39245	328860	14435
0.004816																							-41096	46264	-111460	48555	99651	81617	62100	1752	75057	-39439	9113.9	-9005.7	23681	39768	54523	24521	31843	28751	62470	-5533.6	35175	12509	23203
0.004834	917100	-23012	313480	780370	213890	218930	445490	255560	641120	444840	457070	514610	304340	802780	268080	353730	172470	22233	38674	329790	13811
0.004858																							-41359	44321	-104660	46556	99248	82713	62704	2202.9	73503	-35995	9096.3	-8436.8	23297	39798	52676	25292	31962	28851	61202	-5193.7	32019	12941	20169
0.004946																							-37278	45808	-108200	47073	100680	83021	66202	2557.6	74449	-34855	6584.4	-10793	21058	38187	56614	26283	32309	28625	59112	-4663.5	32755	12845	19944
0.004973	924680	-17668	308580	777060	221260	227000	447490	245200	652580	462590	461590	514990	307890	804950	274310	359510	174300	21216	46604	331670	21447
0.004994																							-35282	45635	-106830	46748	101550	81537	65211	264.71	73777	-34894	5474.9	-8502.7	17234	38182	53674	24543	33053	29829	62996	-6678.5	32579	12383	18765
0.005042																							-36420	42641	-110560	50070	99770	82067	63304	883.25	72184	-34838	4266.3	-7983.1	19052	40448	54073	25664	32524	31161	62886	-4388.2	33308	11919	20146
0.005057	952920	-23258	299090	783980	211070	222630	442060	256270	651860	455010	469770	513380	324470	829470	266220	366950	149940	19942	38158	332810	16613
0.005126																							-38527	46341	-108890	47782	101270	78780	66854	49.623	75153	-35377	4280.5	-7408.3	24588	40919	52130	26986	32087	30293	60121	-6690.3	30332	11556	18272
0.005164																							-35301	44192	-106220	49031	98519	80753	67078	1578.1	74153	-32893	3796.9	-6154.4	28305	39057	55602	24358	31664	30956	59278	-5655.1	32447	9849.8	21462
0.005194	984760	-27887	314950	786900	228370	229480	452540	260040	654480	449790	471350	520890	330090	853800	269710	361430	137450	26599	39396	339700	13036
0.005248																							-33043	43620	-105630	51080	97974	78137	70070	3634.4	73373	-30907	933.99	-7852.6	26431	38950	54379	25893	30662	29610	58828	-4737.4	33969	11997	17937
0.00529	997390	-3035.1	318330	782630	215700	224510	451830	260220	650720	425230	464320	529290	343560	864130	265890	362180	119880	24144	33142	344820	23465
0.005294																							-37395	44839	-102930	53577	99470	79403	66525	2595.6	74927	-30162	232.52	-5858.8	39413	39592	54914	26609	32168	29014	57152	-5298.2	35014	9897.2	18655
0.005345																							-35123	43757	-96849	52096	96995	76922	69903	4314.3	71365	-28810	-655	-5012.2	36871	40911	54904	24756	33618	31355	56375	-2248.2	33175	10482	15125
0.005428																							-32375	46431	-95271	50996	98433	76249	67757	4245	72877	-28586	317.32	-5467.3	40197	38276	56634	26679	33228	30214	56595	-5425.7	34757	10555	14856
0.00543	972350	-12927	322940	781620	209000	227240	450970	265590	653900	420090	471930	532400	347100	876580	264180	365620	122680	24280	29974	341680	16787
0.005478																							-33660	45371	-98569	51540	97298	78990	68982	2410.8	76711	-24754	1983.9	-4997.5	42809	39211	57518	24864	32693	29839	54394	-3063.9	35545	9829.6	14518
0.005507	987680	-7013.3	317580	784550	209990	228640	450710	263410	647630	427520	470210	537850	345350	905720	254200	371920	122910	24994	28664	348620	19429
0.005526																							-34382	45831	-98741	53123	95804	76378	67256	3387.1	74594	-25579	-2339.7	-3067.9	43695	40177	54082	25811	30772	32284	57037	-2454	34642	12365	13326
0.005594	1025200	14143	319330	789450	216440	228260	444080	270520	652310	424770	478860	546850	340540	926520	261420	359280	120910	20222	26899	362440	22891
0.005606																							-34987	45441	-98931	55493	95470	76674	70471	6011.3	75220	-24129	-357.17	-4060.3	44008	38454	53328	26645	31421	30773	55738	-2001.4	33957	12271	11142
0.005659																							-35104	45316	-95468	55123	95639	74286	66538	2578.2	75909	-19343	-2382.6	-3893.6	44003	40255	53584	24226	30630	32445	55669	-1289.6	33475	12337	10182
0.005739																							-38392	43482	-92072	55769	95716	73342	68141	5629.5	75727	-19223	-1441.2	-2910	46185	38800	54248	28037	30098	31351	51720	-1194.4	35015	11931	6312.5
0.005744	1057900	1965.2	311870	790240	216900	230100	439770	271960	628620	415910	488040	547980	347130	925940	264510	367940	124530	20407	22753	365850	27292
0.005793																							-33879	43018	-85605	54316	96171	75739	67166	4051.8	76626	-19370	-1988	-1404.7	44151	37331	51878	27154	31285	32231	52502	-223.55	34342	11896	7386.4
0.005836																							-35570	43971	-80158	55455	94886	75748	65053	5654.8	77691	-19869	-3242	-3374.8	45389	39111	52541	26322	30156	31253	49137	3932.1	33542	12459	7394.7
0.005836	1061000	6165.8	318540	795450	216120	230060	438890	274380	623310	407140	484690	555300	346350	939610	261980	365740	130660	18759	18129	368420	31708
0.005922																							-32907	44375	-76184	54267	93539	72289	65880	5011.1	77280	-18390	-2387.4	-4194.5	46334	38712	52883	28022	30878	33433	53201	3113.9	32914	13632	5326.2
0.005971																							-34037	44970	-75089	53953	93913	76100	60385	5564.4	78443	-13489	-3047.3	-3803.1	46687	37955	54712	27726	29159	32341	53405	3713.8	34822	13223	3656.3
0.005986	1065600	13868	316160	797720	212010	237800	433790	278600	609540	410070	484180	564880	348520	965250	264810	368650	140040	17345	20103	375160	33331
0.006015																							-33441	43521	-76033	54703	91748	74618	58386	6937.5	76670	-12253	-2682.4	-1872.3	44138	38288	52762	27762	27868	34592	53653	6626.3	33498	15133	3815.3
0.00607	1070000	5746.7	318000	798540	209230	232090	427640	268350	599340	411580	489650	566520	352830	973400	265810	373370	145100	13864	23159	390720	32018
0.006103																							-34902	46956	-67404	56257	92007	72273	56391	7726	76538	-9642.5	-2176	-1789.5	43792	37848	52789	27035	29540	33158	52145	6876	33221	13973	3032.6
0.006156																							-32392	44617	-65587	59405	93192	73844	54056	6557.9	76498	-11391	-1029.5	-630.37	45839	40296	49665	28998	29015	32660	50725	8536.7	34111	15447	2528.6
0.006224	1089500	18858	314480	806400	219110	230320	433520	274960	602820	417010	492520	576160	356320	968950	261310	373040	141790	20781	16858	391230	32298
0.006242																							-30904	45121	-65110	58632	94220	74839	47354	4278.4	75076	-9822.8	-219.7	1725.3	44794	39289	51390	28421	27926	32446	49038	9638.7	34566	17088	4482.3
0.006295																							-32833	43054	-65579	56648	92116	72715	49192	6060.2	77801	-7822.9	-465.42	1845.8	43372	38611	53373	28987	29103	32481	46778	11552	32906	14748	4772.4
0.006318	1106300	24477	311030	806860	219500	232100	430530	274900	598600	432490	502320	575130	358110	966970	258600	376510	150180	13506	20033	391830	34188
0.006345																							-32316	43117	-56651	57724	91968	70204	43740	6998.5	77492	-5337	-1024.3	2022.3	43874	38210	51743	27739	30190	33624	44661	12618	32502	16094	4015
0.006419	1114400	33165	313600	812250	213340	235460	411160	280340	591950	438380	499950	572280	354290	982310	265020	377680	158020	20418	16724	406770	33263
0.006434																							-32535	43860	-55723	58241	92474	70380	38729	8339.1	76712	-5596.4	749.94	1855.5	41389	38955	53149	30747	30835	34589	44771	13474	33298	17692	7755.9
0.006486																							-33658	44532	-57129	57882	92808	70588	37791	8324.7	77262	-3541.7	-1155.5	183.8	43572	38647	53568	31585	30315	34721	42979	15609	34963	16421	10055
0.006529																							-31001	43015	-47580	59511	92786	68329	37268	7506.1	75811	-1183.2	-571.51	2226.5	43674	39508	53590	32917	29605	33854	42478	15213	33225	16803	11246
0.006579	1129400	29566	314060	820960	214280	238740	412040	277870	591300	457090	507680	574640	358650	1005500	265940	381900	148040	17648	16784	403440	34992
0.006636																							-31117	43088	-41977	56706	91328	70096	32691	8398.5	77613	-708.95	170.94	992.86	40881	37918	51852	29854	29884	33742	39926	14904	35054	17300	13486
0.006677	1117000	37818	320100	810800	215500	246450	404560	278460	586240	465560	504740	571260	356510	994000	269900	375160	140510	16994	21686	415110	31484
0.006694																							-28662	43729	-40949	58888	91822	69063	32396	8482.3	79309	-1299.8	1159.6	1880.9	36489	36847	52195	29186	29591	34465	34120	15783	34370	14158	16917
0.006787																							-27973	43021	-31474	59372	91846	72883	30572	8585.9	77352	910.71	2463.9	2713.5	31377	38644	51494	31016	31108	35183	35867	17000	34747	16496	15293
0.006835	1150300	37344	315450	819660	210510	235890	418820	288560	593760	473120	509270	574940	350460	1026400	263610	378030	131490	14348	16279	427380	40519
0.006836																							-26194	42551	-31269	60458	91185	72462	28485	8832.3	79468	2383.7	3158.6	4918.4	31748	38037	53553	30832	30620	34839	33088	17969	34755	15803	15540
0.006904																							-26161	42708	-26031	60201	91529	70583	27782	7461.2	79449	2756.6	3741.9	1307.3	26987	37930	52555	31678	31911	35090	34930	20560	37355	17280	16283
0.006933	1149000	48637	310990	824570	216460	244850	420750	288680	585600	504070	516170	562730	357450	1015000	262360	383920	118280	12730	17424	430470	42739
0.006997																							-24586	42830	-27716	60010	90094	68831	27046	7470.3	80203	3278.4	5569.4	4264.4	21432	38477	52968	30976	33023	34137	31058	20063	34759	17001	20364
0.007045																							-26218	42154	-25984	61307	90055	69954	26935	8687.6	79666	3613.8	5206.6	4326.9	22581	38516	53332	30803	29667	35254	36282	21743	35134	16033	21461
0.007077	1175700	44923	306650	830380	218170	242360	417720	286560	588240	517370	521780	557800	347680	964550	267600	377950	90139	16600	17326	438560	45867
0.007143																							-22335	42569	-19619	60210	89858	69583	26189	8775.4	79869	2552.5	10105	5935	19068	38235	52093	31592	30245	35483	30146	23252	36856	16743	23177
0.007179	1177700	40690	319580	829200	212590	241020	417830	293400	579440	526270	520070	560880	345110	971300	268810	383520	83175	15531	17578	441020	46867
0.0072																							-19575	41669	-16844	61127	88337	68503	26604	7947.2	77224	2285.1	11722	4588.5	17604	39033	53999	30593	30918	35631	29189	24830	35650	16684	23050
0.007253																							-15981	45705	-15753	59716	92769	66578	26862	7852	78482	5081.7	12260	6915.3	18329	37212	53070	30443	30909	36040	28450	24280	35601	17860	25632
0.007346	1175900	57578	320180	836330	209260	247330	416670	294470	576940	538460	521330	551550	347830	978120	268680	387530	55061	13923	12355	453860	56591
0.007349																							-13454	42561	-12671	60142	90363	67938	23534	8865.4	79502	4734.8	13766	6067.4	16934	36608	53710	30620	30495	36136	30738	22808	34800	18473	24871
0.007393																							-10664	42626	-12809	60469	90792	70264	22694	9281.9	77746	5468.8	13724	5557.7	11744	36489	54983	31913	31281	35506	25607	22612	36917	18661	27952
0.007458																							-8214.5	42347	-6744.7	58473	90351	67512	23125	8616.7	80746	5519.1	13362	6799.8	3781.5	38235	54942	32133	32957	34751	22107	23846	38205	18812	26614
0.007467	1209200	52023	321070	834060	217230	246830	421670	296380	579020	540680	522560	548510	344090	996630	270730	387870	48424	9653.1	11243	450670	63010
0.007563																							-8279.6	42804	-2003.4	58942	90560	68234	18723	10855	77170	7946.5	13683	5797.6	1679.1	37538	55250	31434	30394	35231	21786	23165	37711	18505	27129
0.007573	1206400	49102	319470	839080	211390	246620	426680	291080	573860	551910	523650	541570	344590	1008100	275330	383080	39937	8894	9882.3	449980	64275
0.007621																							-11064	43179	-783.16	60600	89459	67543	22139	8687.3	79420	7570.6	15164	3888.7	1645.6	39610	54802	32971	30533	36581	17318	23244	37079	17807	27958
0.007722																							-9643.1	41699	1401.9	60389	89182	66704	21488	8874.1	79823	5792	14778	3458.9	-3648.6	38063	55284	31212	29952	34900	16392	20711	38754	19412	29649
0.007761	1212700	63955	321810	841390	217370	245990	420930	293010	568860	554870	533850	541890	345590	1021800	280100	385180	32484	11959	4894.4	468010	67866
0.007793																							-7020.9	43744	4307.8	59723	88181	67182	20793	10340	79854	6352.6	17378	4846	-13309	38995	55805	32708	30467	35529	13379	21410	37922	18010	29439
0.007844																							-6848	41917	1194.9	61953	89243	65369	18046	8879.7	82136	7896.2	18359	5577.2	-13906	36992	56819	33817	31575	34498	10335	20984	39559	19367	30093
0.007863	1223800	63499	316300	842220	214400	246440	423950	297310	577280	572980	537750	541950	347090	1029400	272850	388030	18800	8121.6	7299.5	469840	69927
0.007944																							-5531.5	42212	1309.5	62272	86947	64202	18249	10801	81758	9137.3	19098	6243.6	-21085	38266	55439	32700	30285	35589	9606.7	21996	41015	18713	31394
0.008002																							-5867.2	43898	3134.7	58959	88279	63798	20168	11017	79319	9759.1	17816	9097.6	-23916	36601	55392	33833	30585	35920	9176.9	22443	39158	18480	31178
0.008039	1219900	78158	322030	849140	213450	250450	428070	299050	573720	565150	540360	538140	350090	1058300	272840	386450	19911	11145	8422.8	472030	73369
0.008106																							-4584.7	41360	4599.4	60151	88392	63375	21642	8760	81943	9738.2	20204	7221.3	-21667	38827	55552	34874	30238	35501	8919.5	20196	39221	19443	31076
0.008154	1236100	65066	325890	850180	215320	253490	426340	305090	568930	559800	546420	543320	352390	1068900	278760	388400	20970	14875	9795	473660	73122
0.008164																							-4738.9	42284	8675.1	59114	87027	62261	22438	8591.1	81680	10809	19852	9613.1	-22597	36796	53493	34454	31095	35168	7042.5	20113	39389	19505	30585
0.008221																							-6030.6	41353	10290	58437	87505	59288	21343	10800	81206	11019	21422	6630.3	-24902	36645	52999	33355	30522	38362	5598.5	19032	38892	18074	29978
0.008314																							-4968	42314	10481	60190	87409	57516	22269	9796.5	82387	9803.4	21638	6961.3	-24796	37734	53964	34078	29357	36474	5087.7	18287	39598	20311	30826
0.008318	1215600	66177	330170	856860	214840	255590	430160	307440	567380	563900	546590	546980	349450	926520	271670	393580	26751	12961	11873	470210	77174
0.00838																							-3243.9	41599	11662	59364	87798	58807	24473	9267.8	82816	9937.1	20652	8814.9	-27110	37631	53606	34428	30675	37026	4632	19076	40698	19812	27877
0.008429	1227200	74160	328100	863730	218280	255970	433170	314720	572330	567090	551240	544200	353170	280270	279180	393080	41321	9212.7	11968	476800	69580
0.008445																							-3451.3	40059	12358	59813	86938	56572	22773	10043	81525	11675	21569	6042.7	-26918	38230	53763	35303	29281	36315	4913.4	19539	38790	20491	30925
0.008549																							-1664.9	42000	12727	62370	88095	55053	27247	10135	81053	10782	21324	6774.7	-26243	38270	52482	34382	29739	35224	5253	18651	39683	19708	30255
0.008605	1248500	76168	325570	862800	221220	256560	432790	310290	569080	562720	557880	550830	352700	306310	276220	399820	49071	5043.4	10826	477020	68877
0.00861																							-630.63	41657	15662	62192	87412	53354	27949	9910.6	81474	11588	21265	8824.6	-24764	38460	53960	34477	28500	36908	6789.5	18424	40534	19859	28857
0.008715	1250700	84587	328770	868650	220030	261830	437250	310960	561710	559130	556530	552460	353330	312710	277060	399390	53133	11439	7657.7	476120	68997
0.008716																							-2811.7	41748	15081	63462	87617	56068	28551	9659.3	82705	12146	20859	5724.1	-27835	36577	54415	33551	29875	36573	7383.1	18258	40692	18614	28646
0.008782																							-1079.6	43147	14837	61932	85379	56713	28881	9157	82315	12522	22146	7223.1	-27451	38275	53599	33717	30044	37797	10785	17067	39733	20878	27767
0.008843																							-818.54	41690	17237	61848	86772	54274	27823	10620	82917	12572	22823	6658.7	-27280	39164	53451	35842	30072	37514	7892.3	17376	38900	21514	30011
0.008883	1255400	84902	325450	874160	222510	254400	439550	316390	565780	554800	558390	551890	357950	316630	279240	399000	54173	7648.2	8919	476070	61625
0.008948																							1381.1	40778	18510	61436	85170	51271	31577	11087	81996	12620	23312	7515.4	-26745	37722	54895	33577	30198	37673	11205	17526	40184	19715	29816
0.009012	1263000	79009	331780	875120	217520	256940	445320	315920	562400	553490	560400	559520	353930	319290	282150	397810	61462	5407.6	8549.5	477520	60834
0.009035																							2684.2	41727	17193	63643	87043	48176	30645	11264	83623	13036	22529	7447.9	-27411	39174	53288	35712	28634	38225	12764	16809	39353	20233	29597
0.009113	1284300	93781	326840	880470	217790	263100	452710	316000	565720	555710	559820	562690	353960	313860	286210	406090	72149	3810	13993	479280	55990
0.009146																							1715.2	41703	17310	64086	86005	49498	31401	10391	82413	15225	25876	7014.5	-26393	38992	53649	34398	29854	37991	12406	17283	38077	21472	29493
0.009208																							5132.4	42754	15046	63631	85486	48446	33385	11222	84113	13994	25187	6960.6	-26655	37594	53369	33895	29272	37547	11473	17671	37231	20903	28302
0.009278																							6079.1	42616	12471	62972	85920	50565	34568	11248	82784	15477	28107	7712.7	-26388	38405	53771	35222	29894	37339	9706.3	15502	37219	19505	27226
0.009292	1279600	85611	329280	890640	226590	264440	451480	317210	555540	560740	566010	562490	356370	311420	283480	402250	70935	7641.5	14157	469410	53537
0.009392																							6813.2	41188	11793	62063	85472	54117	34103	10564	83679	14739	28607	8703.6	-23515	39851	54933	34605	31883	38612	11461	16793	35364	21137	28259
0.009406	1284400	93358	332370	890630	218150	262220	457680	321590	566430	570670	568810	572700	353300	302780	286950	403700	81218	5272.6	16479	469090	48562
0.009452																							7154.8	42535	12248	64770	85035	53348	38959	11045	80926	14758	27204	7596.7	-24847	37156	54771	36038	28908	36934	11921	16444	34764	20115	27324
0.009577																							9764.8	40861	11901	64711	85194	52207	39261	9312.4	83950	14245	28348	10430	-23196	39713	55376	36368	29651	37924	12428	16057	34870	20566	27006
0.009595	1285800	91641	333220	889830	222530	262310	461870	325650	567910	576420	574960	570240	357830	306900	286900	407710	94512	3512.7	15603	461550	54744
0.009636																							10058	41820	16200	65418	83900	51788	38345	12103	83261	15284	29302	8949.5	-23144	37833	56106	36417	29748	37987	11773	16561	33387	20157	28793
0.009708																							13094	40245	18014	66058	85818	50279	38194	12502	81279	14549	31566	8673.7	-20662	38588	54968	35410	29060	37249	12463	16733	32262	21334	28113
0.009722	1303300	92832	330990	893370	221290	269250	468110	328590	560870	586960	581400	574200	354730	301100	283720	404920	106940	3292.1	19076	463710	51050
0.009828																							14284	39939	17234	66555	85297	53383	41065	9599.9	81375	15766	32010	12034	-20431	37896	55364	35714	29504	38105	10860	16844	30130	21407	29073
0.009894																							14332	41573	16052	66013	84964	51497	43354	9514.2	83091	16772	33262	10688	-19733	37785	58020	33945	30324	39241	12012	18626	30395	20043	27096
0.009906	1300600	96897	336360	900210	223830	268780	469040	330180	561440	595140	584790	579860	350470	303450	286370	410720	117690	5164.8	15878	453420	54351
0.010002																							14909	39495	12269	66762	85353	54044	42662	10663	83693	14994	34820	10842	-17898	37211	58246	36317	29949	37623	11428	16565	27999	22035	28033
0.010036	1315800	105830	334580	909490	227100	267260	477600	324720	559900	597230	583780	574150	357910	297370	288220	411180	135820	5301.8	17407	455330	55707
0.010066																							14844	40844	10660	66978	85805	53936	44572	11663	84810	15290	37869	10904	-18293	37371	57242	35665	30135	37611	12165	16867	27114	19130	30220
0.010146	1332800	103520	333270	911990	225850	263380	482250	329820	558030	612930	586040	580060	351880	311700	282380	415410	144800	4504.2	16820	445940	56202
0.010146																							14631	39090	9497	67738	84489	53403	43902	9920.8	86393	16876	39346	12265	-19712	38939	58297	35635	30112	37151	9409.9	18107	26354	20010	28776
0.010253																							14582	39118	9455	68770	83629	53131	45263	10511	87513	15634	38648	12146	-19212	38903	57527	36095	30724	37380	11465	16897	26203	21246	29514
0.010323																							15465	40672	8947.3	68285	84645	52462	45788	12802	88919	18073	39795	12515	-15343	37701	59606	37669	30199	38155	10005	17649	24504	21830	29515
0.010339	1357300	104260	328270	920110	223230	266630	486620	331880	558320	619190	591670	581010	355410	295010	290280	415140	164070	926.56	21884	430840	56864
0.010391																							15366	40949	11107	68063	84649	58692	48374	11934	90085	17205	42353	11435	-12582	38813	58221	36608	28450	37779	10702	16053	24791	21814	29151
0.010465	1369100	112880	338870	919470	227420	267750	487790	334350	563850	636110	592400	577500	349960	302360	297510	423190	169050	3212.5	19071	425240	54053
0.01051																							17532	40845	8534.9	67477	83087	59521	48656	11420	88280	17765	45472	13957	-11377	38066	59584	36874	30066	38038	10790	15792	25808	22111	30691
0.010567																							16989	40375	7715.7	68642	82859	55525	49075	11194	88445	16552	43723	15878	-12017	38885	59918	37007	30407	38148	11849	16533	26729	22267	30293
0.010651	1375500	110770	335920	925500	230050	270210	490970	330430	561100	636500	599520	579470	352130	308860	287490	418780	174470	1343.7	17649	423250	53240
0.010687																							19265	42506	5607	67620	82645	54744	49524	11233	89057	19290	44166	14568	-10152	38244	60103	36504	31135	36678	9118.6	15612	26374	21947	29937
0.010757																							18161	40344	6765.3	66826	83699	54123	50088	11655	89525	18019	47782	13754	-7625.3	38238	62206	36845	31694	37075	8404.6	16548	26835	23400	32369
0.010778	1392900	117780	340060	932390	221780	271990	492910	333430	559890	646050	605740	579440	348600	315250	292470	418860	180700	4464	20134	418270	56908
0.010826																							19471	42296	6811.6	66459	82907	54292	47643	11320	88502	17566	48926	13476	-7306.2	37872	62324	36649	31341	37265	9203.5	17623	25529	21982	31779
0.010952																							15767	40944	6615	65633	83208	53367	49647	11921	89534	19311	49791	15398	-5788.1	37814	63804	36843	29480	38154	8475.5	17924	26972	21266	31273
0.010996	1408500	107680	337910	937110	228360	276880	495610	335070	556980	658660	604740	580730	340890	317160	295640	425640	182090	3111.5	20518	412130	52444
0.011025																							17222	40949	4372.7	67347	81215	52323	47943	10730	89366	19595	51604	12999	-6971.5	37144	63717	37434	30127	38148	11314	15691	28126	22975	32953
0.011115	1426500	123440	342360	937310	223130	272740	501590	334610	553600	668930	610290	584020	347230	333620	293100	429110	185860	12225	23863	408470	57412
0.011142																							16787	41632	6333.9	66965	82793	53277	49112	12859	88694	21258	51857	13671	-6545.6	38441	62938	35924	30847	36869	10403	17052	27874	22459	31690
0.011207																							18757	39105	5769.7	68387	83357	54881	47937	11114	86781	21817	49881	15114	-4466.8	38860	63786	36959	30747	37569	9004.8	16727	28989	22338	32674
0.011241	1435000	121560	340450	948730	225700	275410	509680	335690	561830	683230	609730	583910	347220	327830	298100	427200	191910	13067	21396	408740	56623
0.011284																							18354	40768	4578.8	70304	82074	55283	48837	11432	87573	21350	52145	13609	-2855.5	36230	63521	38437	29711	38094	9064.2	16233	28368	22237	31948
0.011397																							19027	41656	6377.6	70230	83019	52391	48576	11718	87250	20874	50270	13909	-1854.9	37672	65096	37185	30188	38389	8427.2	16819	27747	21570	32756
0.01145	1430200	118370	343400	948150	224620	274730	509930	336050	555270	687410	617380	580440	353410	330450	297380	429830	182100	8963.2	24489	403520	63340
0.011483																							20116	41912	7447.3	69545	82164	51961	48055	11313	85777	20106	50180	14526	-1058.6	38525	66602	36779	31449	38048	8360.3	17172	29634	22849	32841
0.011543																							19435	40774	8789.4	70927	82181	53177	49315	12780	88364	21270	50892	14392	-424.35	37621	67671	37070	31313	39217	9288.9	15727	30207	23717	34190
0.011582	1436400	122550	340390	960840	226290	274780	509660	338280	556280	697860	619530	577770	352830	345850	298490	431840	178110	11158	25750	399280	67823
0.011673																							19835	40503	10281	70046	81925	50994	48162	13161	87094	22307	53601	16040	71.342	38290	68265	38568	30757	37869	9957.2	17947	31184	23313	33544
0.011744																							18122	39655	10246	70008	83060	51426	49569	11114	85672	22887	52847	15604	-868.53	39415	68165	38822	31984	38001	9631.3	16228	31894	24251	33733
0.011825	1445500	121180	343270	965950	232230	280300	508750	345080	558130	696480	621580	586400	347120	345660	302560	438260	169250	15211	22305	398290	66701
0.011867																							20117	40841	8944.7	70452	82074	52470	49015	14436	86501	23731	54045	16187	1380.8	37393	69832	38355	31379	39764	9955.3	17476	35096	23261	34702
0.01194																							19984	41927	10973	70525	81670	52165	48523	13426	86824	24199	55967	16245	1663.6	37691	71623	38575	32743	38979	10489	16326	36424	23650	33218
0.011947	1455000	123200	343860	963800	230530	283330	517230	342200	560450	702480	628360	581830	344110	361620	299130	442100	161630	11877	21171	398460	66370
0.012																							17877	40018	10590	71303	80950	51717	47959	13281	87380	22550	54645	15545	2012.3	38898	73157	39102	31424	39528	11073	17190	38429	24170	34462
0.012123																							18866	41976	13322	71496	81980	49861	50132	12615	86427	22867	54145	16072	2357.5	36767	71942	39512	32839	39717	11187	17120	38481	24540	34628
0.012165	1479700	132950	347280	974760	238690	280080	518360	345910	554550	706880	629490	589270	347570	370990	300670	442470	158980	15762	21147	401750	68790
0.012202																							19595	42364	13261	69453	81081	49374	48543	12127	86457	24141	54089	17423	3013.6	38222	73839	40064	30562	39371	11342	17126	42072	23167	34894
0.012281																							19275	41731	12829	69214	80098	49935	49547	13452	86796	24694	56080	17706	2442.7	38614	74276	38982	33052	39827	10606	17708	42236	24115	36096
0.012307	1483300	126960	342530	976250	230580	282840	521740	347600	557500	708120	632640	592740	338950	360900	304830	448330	154330	19109	22033	414000	66768
0.012401																							20186	41176	13890	68641	80558	48069	49929	13282	87220	23880	54278	17968	3770.5	37190	75448	38846	32796	39550	11848	16619	43936	26275	35509
0.012479																							20145	41214	15747	69419	80157	46659	50181	13186	86389	24037	55084	17137	6067.6	38519	76825	40508	31870	39697	10201	16778	46860	23646	36772
0.012513	1503100	137490	344130	983830	233250	283910	520320	347370	557930	714210	637040	598140	338850	369300	304730	448820	149890	25619	24206	412480	64847
0.012606																							19633	41018	17469	68744	78396	45055	49656	14905	87176	24583	56481	17295	5077.4	37701	77391	40591	31690	39729	9916.1	17432	46380	25056	35535
0.012643	1501400	134060	347570	985380	233740	286160	526930	347920	556370	724580	637090	608030	341790	387300	304430	451310	150430	25270	20853	424550	68720
0.012683																							20365	41939	15937	69578	79134	49878	49840	14459	86463	24367	56821	18640	6694.8	38829	79127	40549	31556	39747	9887.8	17914	48392	25059	35886
0.012767																							20715	40018	17748	70407	77976	47589	50587	14283	85645	25063	58900	17584	8734.8	39068	80505	39641	30723	39655	8871.6	17104	49032	25205	36973
0.01286	1519400	146310	347530	990430	232630	284910	524250	350170	558440	738150	646290	604960	344790	389810	306780	458750	151240	30495	24219	426710	64513
0.012896																							20296	41308	18059	70688	80024	49232	49335	14857	87360	24844	58983	18566	9417.8	38835	81338	38800	32684	40508	7409.9	16972	48637	26435	37799
0.012972																							19330	41168	18447	72065	79074	49901	48564	14789	87070	25552	61366	18405	8656.5	38059	82702	38997	31735	40207	6410.5	17642	51307	26023	36872
0.013012	1523500	142400	349660	996650	234350	288060	529030	355870	555030	748420	645380	611890	352960	371250	309410	459060	147660	27317	23453	434370	67386
0.013118																							19870	39791	20149	72589	78742	47167	48790	15197	87158	25697	64158	18931	10768	38463	82937	39908	30661	42412	6894	16218	53286	24948	38487
0.013143	1523600	139350	350530	1007700	234010	288700	527920	355090	558780	750440	650530	618600	347770	376200	310380	466870	142700	29361	23272	441320	67284
0.013194																							20835	39659	20775	71987	79383	45176	52516	15001	88430	24965	62936	18661	10935	39513	84772	40326	30760	41381	7773	17371	53919	26650	38927
0.01328																							21682	41143	21834	74106	78170	45836	51010	15338	90537	24155	64343	19391	11658	39096	86661	41141	31892	41007	7632.9	17197	54007	26780	39259
0.013353	1529200	143990	353080	1017200	238000	290770	525950	353040	559840	762010	651840	617620	354550	395320	311010	472480	139790	33287	24036	452060	68035
0.013416																							20782	41654	21895	73639	78030	46175	51851	16202	93374	24615	67614	19854	12907	39592	87489	39483	31376	41524	11898	17635	54099	26135	40626
0.013483	1531400	147490	346760	1016200	234460	293180	537480	357990	549950	766160	659690	620850	359920	406380	310620	478140	137630	33527	19507	461480	70699
0.01349																							19967	40248	21615	74152	78256	45425	52139	15545	94335	23169	68479	18588	11707	39312	88771	39797	32539	41824	9915.8	17939	53030	26194	39360
0.013624																							20169	42223	22300	75487	78332	47757	51716	15061	94341	23174	73096	19860	14006	38735	89544	38435	31683	42169	8381.7	17523	52558	25092	40059
0.0137	1545300	145970	352610	1024700	234850	298330	536950	356550	551440	771110	661630	631830	373090	420980	310930	479680	139250	35564	22237	470470	69819
0.013713																							20206	40452	22200	75848	79347	47558	52052	16327	93427	23921	74430	18909	13809	39655	91224	40934	32361	41897	10859	16701	52264	26658	40120
0.013789																							21630	40818	23508	75233	78107	47122	52978	15256	94753	23044	75756	20361	15108	38545	90331	39786	30886	41374	8907.4	18096	50614	27040	39967
0.013853	1534500	156250	355930	1030500	239420	298460	536810	360480	563570	773610	661630	636470	364230	433840	311590	481140	141240	37318	18219	476340	75198
0.013904																							20284	41484	23277	74710	78726	50332	52172	16290	99976	24884	78640	20908	14250	39277	93503	40707	31815	42706	9216.9	15777	49586	27071	40463
0.013975	1542000	155430	354830	1038900	240380	302530	544870	366060	565520	783100	666020	639240	371970	441720	315770	483100	147160	36081	21369	483260	77136
0.013991																							20932	38732	23465	74313	78158	49451	52276	15073	101240	23751	82624	20704	15196	39562	95857	40777	33414	42506	5985.8	15998	47001	26032	40509
0.014136																							19683	40194	25270	73573	78863	47851	52918	16501	101560	24580	83384	23186	15876	37855	97664	41917	31802	43273	8340.8	17239	45037	26248	41501
0.014215	1533700	147620	350590	1042700	231650	300380	547720	366510	570320	784680	669210	647530	372430	464920	313820	488630	144390	35105	21406	491050	76049
0.01422																							20854	40531	25077	74525	78742	45569	54011	16752	107210	24962	84375	23475	14363	39334	101180	43111	32368	42206	7321.4	16538	41209	26459	42922
0.014296																							21984	40407	25709	73825	78114	42429	52923	16567	109130	23681	91218	22613	15187	39527	101540	43243	32763	42328	6993.2	16596	40301	26507	42257
0.014362	1533000	158120	358070	1047300	238040	300890	544680	371070	567550	795270	668380	651020	383470	471300	317320	493300	140790	41080	23734	496410	76606
0.01444																							21281	40951	25985	74370	77100	44041	53396	15542	115190	23579	93912	22401	14492	38152	103840	43448	32929	42524	8791.8	17245	37638	27527	42688
0.014513																							20758	39837	24901	74005	76557	42231	53875	16447	117770	24609	91950	22452	15411	39772	103710	42848	32674	41967	10066	17676	34407	26785	43213
0.014597																							22114	40436	24547	74379	78403	40304	53680	16123	122160	24709	98829	24988	15805	40083	105410	44165	32450	40177	11883	17061	33115	27469	43982
0.014607	1531900	162790	352370	1055300	238850	301590	545330	371940	565730	797930	671130	653440	381630	491770	315890	496040	140680	38413	21161	502250	78338
0.01473																							22369	40880	25408	73044	76513	39565	53159	16860	125220	24099	99484	23867	16206	39214	109050	43111	32642	40585	11972	15597	26974	27497	43791
0.014747	1500000	157920	353460	1063000	240950	301940	548550	378170	573370	805650	678300	651230	378270	500470	319510	499220	131290	39119	23479	512810	84724
0.014815																							23561	39652	24182	72596	75791	41476	52489	16196	127660	23870	95671	24231	16037	39286	112320	42987	32959	41713	10464	17180	23501	26869	44472
0.014949																							22694	39503	24380	73916	76695	41670	53649	15539	133170	23985	101940	26153	16118	39749	114770	44131	32776	41638	11583	17273	19025	27659	44814
0.014994	1513200	159280	357330	1064600	241480	305760	551010	381680	573080	813390	681140	653570	384740	511110	317460	509530	127590	40654	22264	517970	84062
0.015042																							22644	39402	25206	72928	76475	36222	53355	15868	133680	23905	104170	22929	16448	40534	116000	43019	32191	42713	13227	16579	18171	27461	44259
0.015114																							22559	40490	23697	74765	76371	37650	54841	17704	136180	24615	111860	22279	15182	40318	117590	43913	32486	42549	14313	16629	11235	28325	45770
0.01514	1487600	160970	354330	1073800	239300	307870	561190	393970	569240	825280	685020	662410	395860	524890	319670	514760	128170	37921	22744	523690	88562
0.015243																							23101	39588	23312	75384	77765	37719	54132	16883	140350	23817	114520	22622	14445	39556	116300	42778	32088	43490	15471	16940	4494.2	27859	46127
0.015337																							23516	39355	25280	74366	75868	39261	53856	16665	141730	25049	118690	20755	14610	39354	118650	44395	32681	43263	15665	16877	-4714.7	27879	47043
0.01537	1484100	163890	358110	1075300	242130	307800	564190	397370	578570	827710	689720	663950	402770	539690	323150	515920	131450	48282	19201	524650	88841
0.015489																							23133	40355	22731	75036	76555	38343	53439	18033	146440	23683	117400	18970	14822	39975	121830	46652	32355	44507	15737	17697	-6539.7	28476	47372
0.015522	1493800	162140	364550	1088500	241110	315490	564530	400790	578250	835030	691210	671240	400730	545350	320900	520250	128580	46810	21154	538970	88529
0.015572																							24999	40228	24367	75580	75812	37844	54154	16604	148990	24293	119910	19578	14410	40136	125010	45218	32396	44629	17363	17000	-11197	27600	46604
0.015646																							24406	41418	23800	76188	76879	37633	53378	16726	153190	23875	130220	19354	14959	39033	126950	48261	32368	46531	18784	17809	-16650	27413	47312
0.01566	1504400	163900	359810	1091500	243590	312060	577010	401320	572290	843120	695850	671700	404980	555810	329390	523370	127640	46425	22811	543140	93806
0.015774																							24554	40463	24169	76733	74136	35360	52944	19273	155710	24219	134380	19835	14473	38614	126380	47098	32329	47295	19955	17798	-17902	26380	48674
0.015865																							24206	40731	24406	76163	74917	34466	52393	18329	158450	24206	133790	20671	15713	38728	128490	47550	32434	45999	24662	17758	-25929	28658	49556
0.015889	1505300	174810	359660	1100300	241840	313040	580010	406570	567060	853190	699930	674340	403720	566310	326820	526600	134080	47114	22364	548810	90735
0.015963																							24696	39845	24052	76676	75577	35593	51933	18004	161490	23759	136820	20909	15452	39242	130710	47295	32655	46880	25190	18220	-28007	28421	50126
0.016059	1505100	171920	361880	1113100	244880	315290	583860	407590	569350	859260	703290	676160	407130	580390	329620	529100	137300	46959	28234	553600	91109
0.016126																							25427	39597	24866	75998	74364	31188	52317	18660	163420	24968	141240	20883	14579	38594	132810	48548	33027	46092	27827	17666	-35412	28266	49940
0.016208																							25370	40811	23121	76672	75699	33817	52298	18231	162590	24309	141920	20258	15685	38596	134300	48594	32920	45489	30742	17404	-39041	28222	49869
0.016311	1525800	176740	360060	1117200	246600	316300	587480	407320	580610	864390	710020	676790	395650	596600	327140	533330	135660	46601	24621	567710	89998
0.016368																							25995	40338	24708	75426	74516	31760	52089	18759	165240	24882	142590	20821	15829	39210	135810	48663	32608	46407	31483	18039	-43099	27932	51208
0.016451																							26345	40511	24173	77723	74216	33499	50597	18548	165300	24781	141640	20168	15741	39443	135670	49111	33506	43190	32068	17921	-48965	28721	51081
0.016474	1517900	173470	363260	1126500	245310	320040	597780	409440	580180	870930	711330	683560	391120	603300	328800	541260	135930	50548	23828	571140	91085
0.016529																							25895	39784	25531	77267	73478	32869	51575	18950	166100	25242	141830	20112	16094	39780	136040	49589	32743	42824	34203	16008	-53836	28349	52165
0.016691																							26760	39249	25085	78420	74124	34814	52024	17571	165370	24915	142630	19156	15063	39874	136600	50418	32789	39397	35481	16414	-60746	29051	53263
0.016732	1528400	172310	361060	1131800	241990	318630	603260	411270	585820	874300	715560	681370	386750	620600	332110	546940	133950	48934	27901	579320	92064
0.016774																							26470	40709	24354	78399	73158	33284	52628	18263	163390	24153	143120	20364	15844	39450	137190	50795	33613	38306	40083	16608	-62094	28665	52776
0.016905	1539800	185130	367450	1133400	246580	320870	609900	413480	588570	886220	720000	691660	388450	630260	332450	552380	133650	49652	28091	588340	96258
0.016929																							26278	39761	25949	77252	72247	34589	52434	19124	163690	24636	145090	18816	16951	39238	139080	51102	34167	36140	42753	17470	-66777	28372	52777
0.017018																							27150	38864	26825	75911	73494	33101	53005	18977	163650	24191	144800	20160	15930	38481	139020	51482	33850	35447	44147	17438	-68338	28779	53397
0.017047	1524500	188820	363320	1144900	252540	321910	611890	416620	598300	896170	723550	693550	391350	650740	337920	554890	130400	49529	28766	594370	98208
0.017098																							26568	39663	26418	76251	73453	31522	53544	19491	161560	25197	145220	20838	15998	39808	139960	51588	34254	34228	47070	17892	-74623	27842	53713
0.01725																							27643	40565	27556	73510	73737	33138	50958	17349	160060	24541	144730	20841	17382	38625	141920	52279	33532	35658	48165	17742	-75690	28222	54938
0.017324	1548900	176190	368240	1152000	246460	326020	615080	415290	601850	901810	728640	695540	385470	660730	334460	559910	125020	48510	30329	597160	99687
0.017349																							27425	40311	29944	72729	74211	34081	50273	19612	156100	24534	145860	21818	16925	39164	141690	51937	33037	37408	49197	17599	-76225	28854	54740
0.017474	1554000	182620	370010	1159800	247600	326740	622440	414220	596260	909320	727130	697590	381230	672530	338620	565550	133260	47046	28038	608800	97338
0.01751																							27613	40521	31495	72918	72956	33221	50976	20050	147370	23567	146800	19634	17170	38934	144530	52876	34194	38022	50976	18639	-80685	28939	55878
0.017588																							28055	40788	31134	73515	73269	28656	49895	18941	146030	24670	147130	20369	16308	39399	146890	53624	33189	39378	54802	18456	-82002	29080	55498
0.017696																							28603	39976	32847	73529	73088	29516	51294	18655	144840	24376	147770	21747	16161	40068	141030	54341	35027	43921	52943	17707	-84439	28598	56755
0.017739	1556900	185890	367180	1164600	248710	328700	622100	416280	586850	914040	736520	702830	384330	685790	340150	570060	127030	48699	36340	615830	101710
0.017846																							28494	41126	32440	73972	72598	29438	49720	19827	137740	23772	147710	21405	17467	39840	141840	54865	33484	47392	55522	18240	-84898	29304	56583
0.017918	1579400	191790	374300	1173400	248100	329140	630640	417070	578000	919410	738860	703050	383910	695090	340290	573780	133930	45951	30058	622280	104680
0.01794																							29954	41690	33712	74377	71655	28592	49891	19830	132860	24548	148190	22147	15975	39109	144930	55988	34100	52750	57667	17224	-89127	29364	56769
0.018091																							28772	40191	35135	75341	72669	27181	50596	19674	129880	23431	146800	19999	17884	39952	143420	56993	34807	58188	59433	17460	-92702	28740	57940
0.018194	1587000	184060	371390	1179800	251330	333500	633550	419110	579430	922840	747510	701080	377240	706060	339890	577680	126810	41422	33201	623210	109270
0.018195																							28432	39805	37206	75039	72606	25864	50488	20122	121150	23386	141590	21640	16797	39590	141450	56324	34852	61285	60263	17511	-92245	28997	59666
0.018288																							28272	39062	38407	74464	72084	23031	50814	19596	117420	23014	140130	23122	16210	37884	140080	56486	33750	66823	60215	17551	-92949	29063	58798
0.018347	1602200	187420	371160	1186200	254440	332810	640210	419210	575670	932480	748930	704450	378360	714070	342430	578660	129070	43963	30813	628940	108690
0.01844																							28630	39888	39085	76403	71270	22875	50700	19944	112190	22662	140130	20203	16421	38558	138760	56123	34990	71374	63226	18437	-96608	29187	60344
0.018568																							28044	39391	39794	79101	72230	23045	49834	19033	101460	23539	135610	21052	16763	38989	142660	56161	34431	79025	63595	18609	-96390	29380	61011
0.01861	1592200	188960	375000	1199400	253230	338160	636260	422580	573570	941880	756160	708310	382310	713770	341460	584470	131090	44285	29898	637930	112340
0.018726																							28978	40165	39595	79129	71720	23144	48450	20902	96724	23880	133680	19595	15903	39998	143880	56051	35397	85513	65758	17424	-98160	28877	61530
0.018799	1590200	193670	378840	1200200	253510	338040	637150	430900	577190	943000	758050	708780	382300	717620	343690	584410	124210	40200	31059	645510	115240
0.018804																							29181	40219	41824	79896	72519	24043	50506	20013	91415	23399	130880	21713	17709	40125	147870	57062	35512	87755	66318	18256	-100480	29479	62516
0.01891																							28996	40426	39731	80627	71187	25107	49764	21334	84773	23622	133450	22021	17407	39665	148640	55708	34817	89700	67011	17076	-104550	29080	63522
0.019053	1591700	198180	377320	1210200	252580	340770	649750	428280	574730	953030	765560	714260	378610	716810	343820	594150	126050	41775	30775	647380	116990
0.019057																							29970	39997	41157	80085	71475	23733	51072	21826	78305	25338	128550	21770	17078	40332	148150	54871	35508	93447	66820	17825	-102940	29684	63230
0.01916																							30264	39744	41963	81090	70483	25406	49835	20192	75970	24579	120480	21658	18605	40395	147660	57096	35125	95609	66613	17973	-104080	28910	63541
0.019233	1559200	196670	377490	1218600	254740	343340	646830	433790	570940	959450	773690	716790	377510	640040	350480	595160	123830	41434	32847	656770	118140
0.01932																							30163	40448	41718	81165	70740	25987	50334	20815	69585	23231	116360	22067	17201	40141	148910	55656	34410	94555	66409	18695	-104390	30468	64755
0.019397	1543900	198690	375880	1221200	251470	341600	654430	434090	574220	969580	773710	716750	376020	507770	352100	603390	127350	41955	28807	660640	121950
0.019445																							29841	40865	43533	82780	71478	24276	49154	20932	66060	24294	114850	21904	17765	38520	148800	55354	35741	94048	65563	17424	-102080	29973	65604
0.019532																							31387	40647	44284	83659	71001	22078	48011	19672	65361	24317	112910	21276	16125	38557	149330	55530	35523	92369	64579	17407	-102180	29820	66668
0.019659	1540700	197100	380280	1239300	256020	344050	659380	434700	576530	976410	784940	721570	381840	253720	349400	603610	128240	40614	29205	666340	120020
0.019687																							30943	39502	43345	85038	70687	20841	48826	19900	62162	24266	109930	21190	17714	38742	149370	55637	36908	88702	64667	17885	-101890	29868	67402
0.019795																							31724	40192	42955	86254	69654	21252	48652	21117	61016	24612	111130	20107	17780	39930	153690	55902	36054	85624	64166	18022	-99416	28894	68789
0.019841	1510400	203130	384020	1244700	258880	345990	660970	437250	575630	985540	783720	721720	377850	269250	348230	612670	127540	40846	29782	669410	127430
0.019969																							29954	39855	43649	87425	71694	20192	48938	21184	58465	25142	108720	21331	17575	39701	152910	55874	36713	80438	63391	17643	-94479	29324	69282
0.020053																							31364	40054	44368	87669	71332	20601	48902	20856	57519	24913	101860	21818	17112	38125	151960	55580	36163	78393	63443	18153	-95969	29877	70126
0.020128	536460	197300	381000	1254800	256470	351370	670030	438350	575170	995400	788250	728390	380030	275690	355160	612670	129310	42766	31216	676900	125870
0.020168																							31669	39587	44492	87203	71424	22644	47501	20246	56582	25074	99485	21872	17816	39494	153990	55588	36867	76443	61212	17649	-93999	29815	70646
0.020302	551320	197050	382380	1255400	257680	352500	672960	438410	576060	999210	792040	733200	380020	282380	356550	618280	127010	42053	30895	684520	130360
0.020336																							32347	40794	44093	90012	71012	21905	49232	21444	56182	24390	98245	21598	18144	39894	156570	55670	36322	70119	61259	18032	-92298	31136	71619
0.02043																							31507	39420	42850	90143	71491	21829	48111	22456	54905	24227	95687	21717	18736	40038	156400	55316	36522	66279	59737	17861	-87432	30017	72287
0.020587	557200	206400	383240	1268600	256770	353150	677300	438810	575410	1012000	800710	732510	383470	290910	356070	619490	130170	44339	32299	691080	136580
0.020592																							31683	39614	44270	89950	69879	22662	48492	21380	54058	24497	95909	22333	18181	40158	156800	56294	36938	60586	58971	17968	-84136	30305	73058
0.02071																							31972	39787	44100	89428	70380	18221	48316	22467	53657	24602	92993	21963	18117	40588	154950	55975	36415	58643	57222	17679	-76035	29060	74225
0.020768	569050	199090	383870	1277800	257380	359430	677800	439170	576000	1015700	803490	735960	381440	291870	360730	627350	132690	43395	32711	698390	135600
0.020803																							32393	40569	43634	91421	69912	17451	48915	20514	53478	24674	90876	23153	19992	39538	154780	57064	36015	57010	56062	18294	-73860	30070	74922
0.020937	582950	202120	382960	1284000	261900	361430	682560	440820	577390	1031100	806990	739940	386280	297940	360920	626280	133880	42422	33363	705960	137780
0.020956																							31644	38303	43786	90943	69331	16232	47844	21630	53849	23008	87890	23754	18464	40351	152940	56947	37322	53577	55421	17180	-69074	30871	74943
0.02107																							33956	40028	44034	91111	69225	13045	49043	22095	56346	24425	89909	23319	18968	40293	153420	57286	38038	50679	54899	17785	-59433	30497	76897
0.02121	596040	208230	387280	1294200	261060	359000	689190	439230	584730	1035600	815660	747340	382220	299090	359680	629150	133150	46271	35481	714870	139320
0.021236																							32043	39833	43952	91486	68484	10581	48858	21967	54099	24143	89023	21116	18306	40996	154240	57245	39259	48283	52991	18664	-52356	29838	77909
0.02133																							32746	39768	44087	92274	69485	11337	49996	23559	55969	24334	87141	21186	17697	40565	154750	59085	38607	47380	52054	18372	-43346	30715	78514
0.02138	599630	210350	389550	1303200	262300	359100	685560	444460	579090	1040400	816770	746900	382700	315010	359960	634640	137780	44279	34058	725030	144140
0.021445																							32264	38956	44813	91797	70207	10436	49567	22169	55472	24295	87468	21540	18162	40398	156840	58727	38637	47013	48918	17501	-33486	30797	79264
0.021606																							33206	40187	43683	92529	69046	12003	48933	23193	56267	25191	87919	21736	17942	39874	156580	61315	38587	46327	46268	17664	-28256	30869	80279
0.021651	601200	214370	386770	1311100	262430	362950	694650	442890	582460	1053200	822730	753290	379170	322090	360900	638730	136450	49190	32413	725930	145890
0.021699																							31879	38691	45159	92644	69365	9179.2	48711	22170	57353	24965	88602	21019	18633	40169	158400	64563	39095	45920	44594	18107	-23789	31299	81764
0.02187	604580	204650	392280	1326000	264270	364540	697340	442590	581290	1059300	828470	756830	383460	335700	360620	643200	138130	46997	30898	737040	145790
0.021889																							32767	39238	45148	92419	67807	9287.3	49544	22229	59494	24755	87978	21771	18604	40552	161160	64920	39118	44398	43835	18235	-15466	31642	81924
0.021997																							32473	39628	44987	92076	68392	6398	49670	22125	59917	24956	85455	22320	18285	40131	160980	65592	38823	43816	40204	18295	-12127	30999	82598
0.022099																							32151	40655	44045	92252	68924	7137.4	49218	22387	60848	24139	84858	23477	18916	40765	160750	64467	39757	42275	38853	18563	-6117.3	31340	83683
0.022159	609960	211860	391090	1328000	261470	368400	702340	445260	584280	1068600	838500	758720	380210	344480	359850	644670	136840	49685	34365	742550	145460
0.022266																							32183	39288	44304	91666	68261	6562.6	50543	22792	62707	25203	86606	23091	19782	40877	160980	66963	41043	41233	37715	18459	698.57	31360	84788
0.022352	619160	217930	389110	1341400	264620	368480	702340	445260	582020	1076800	842480	763100	387750	353110	361670	644300	137840	48126	35912	748990	149610
0.022358																							31980	38727	46714	91321	67551	7074.2	50265	22412	63959	25257	83330	23022	19351	41278	158880	66983	40488	41789	34012	18873	9147.5	33242	84871
0.022552																							31588	39880	45177	92272	67822	8784.3	50375	22972	63620	25245	81131	22954	20598	39613	155430	66898	40259	42076	30994	19122	14781	31776	86217
0.022636	626200	220290	395250	1353000	269810	371440	710830	448000	581580	1088900	848200	767750	385800	362660	359740	649940	137650	51196	37598	755910	152520
0.022665																							33814	40524	45274	92465	67365	6270.1	50245	23136	64207	24938	80424	22026	18406	40419	154620	67587	40058	43314	31080	18386	21046	32176	87295
0.022768																							32351	39815	45132	93781	67224	3299.6	50820	23612	64930	24904	78981	22892	19176	40442	157090	68750	39675	43837	30525	18825	31571	32235	88942
0.022831	622910	215170	391710	1361000	267260	376910	711880	442240	585720	1094900	850880	766270	380560	368880	364210	641170	138640	45766	37451	762560	156450
0.022947																							33206	40199	44372	92594	67287	3768.1	50543	23191	65181	24690	69253	23183	20683	40578	156640	69362	40631	41634	31529	18734	38818	32180	89713
0.023008	637730	218600	395200	1369200	265450	375770	713070	443260	587420	1104000	854360	771900	380730	377270	365010	642410	138300	48850	39772	765960	157630
0.023071																							32800	39236	45005	93988	67460	4327.6	51843	22400	66106	24753	61804	22748	19437	40820	157810	70654	40818	39766	30550	18871	42868	32297	88783
0.023242																							33461	40058	46601	93421	67190	6948.2	51567	23056	67729	25135	60896	22064	19587	40437	157650	71582	42042	36122	29438	18484	46552	33467	90608
0.023308	639570	222330	399670	1375200	269140	377220	722080	444850	585800	1113600	862530	776450	373250	391770	368380	651280	137810	50707	35433	771110	164740
0.02334																							32377	39798	46013	93047	65506	8019.7	50398	23217	71153	25403	53219	24169	19912	40711	160020	73740	41740	32954	28481	18012	49074	33820	90585
0.023447																							32896	40523	47329	92571	67714	10105	51531	23294	72766	25813	46999	23880	20201	40564	161040	74869	41559	31038	26584	18514	57345	34026	92381
0.023519	638320	221460	398140	1382700	267640	382290	726260	449470	587240	1120800	866970	777040	375540	397800	370590	654750	140800	49382	39486	776620	169190
0.02364																							33311	40794	47201	89671	66886	11126	51023	23276	74328	26457	43290	24162	20130	40370	156500	75371	42562	28715	25195	18370	58636	34666	92302
0.023748																							33704	40510	47243	88656	67706	9478.7	52524	23448	74681	25603	40187	23343	19919	41619	156320	75718	43616	28930	21540	17952	70734	35402	93599
0.023806	642860	220690	403250	1388300	269100	382140	727560	448640	582490	1132700	872500	781160	376040	410920	369680	655940	144530	47213	40415	781120	171480
0.023923																							33534	40290	46060	87977	67545	7892	52111	23199	77377	24721	34026	24976	20933	41374	154230	76460	42748	29535	21116	18573	74919	35111	93962
0.024009	640030	222640	399880	1402900	271000	387480	731570	449520	584130	1138000	877770	786850	373180	422100	371130	658330	143870	49752	41982	785740	171430
0.024021																							33486	39971	47711	87840	68255	8966.2	51549	22744	77677	25144	32805	24418	19631	40846	152600	77862	44325	27348	17324	18690	80625	35461	95286
0.024135																							34135	40785	48331	89249	67046	13918	51707	22960	78504	26241	27208	24961	20005	40904	149660	77577	43649	28190	15929	19060	87051	35892	97343
0.024313																							34410	38700	47192	88866	66410	14503	53318	22967	81821	25895	24680	25029	19989	40650	152360	79299	43845	31342	15173	19628	93079	35748	97244
0.024318	653560	225460	402350	1410100	274390	388980	730050	448870	586680	1151200	885740	789270	368830	425840	372280	664630	146490	50542	38166	787970	172250
0.024426																							34830	40061	48452	89275	67323	10354	52404	23737	82662	25675	15645	24866	20234	40908	152840	79916	44403	32080	14150	18149	98532	36163	98125
0.024513	660870	229760	403930	1417400	277330	390620	739930	447570	588240	1160300	887590	795110	366770	439480	375590	665370	148910	48455	42897	792950	176130
0.024525																							34584	38950	48643	89724	67615	10398	53515	22933	84473	24665	15039	25031	20784	40840	149420	81052	45138	34559	13279	19559	101250	36916	99080
0.024723																							34761	39897	47842	92266	67050	6608.5	53300	24129	85962	25039	9969.9	25012	20831	40605	150850	84371	44882	36618	10382	18344	105240	36927	100150
0.024829																							34586	40211	47827	92248	66708	8052.2	52890	23483	86470	25162	5673.5	24450	20740	41611	151230	84326	44920	37621	3496.8	18016	107520	36573	100390
0.024835	670990	227050	405990	1429900	280620	394640	744600	450130	593990	1175300	897080	800700	365910	445520	375780	669070	149040	50694	49647	797450	178430
0.025028																							35080	39615	48589	94117	66006	10448	54259	24153	87389	26213	7020.3	25923	19707	41399	153150	86917	45949	40252	2892.3	19035	113130	36919	101660
0.025045	680870	229120	405710	1442700	278120	394240	747040	448230	589210	1182000	900180	801740	365470	464410	380560	674590	150440	50722	52172	802380	186750
0.025149																							34769	40535	48486	93623	66689	8574.3	54536	24953	86186	25908	1609	25280	19624	41387	154010	87960	46491	43146	-615.61	19781	115120	36969	103480
0.025231	685790	231300	406860	1449100	281510	397750	753370	450070	586630	1192900	901880	808760	359200	469380	378310	671240	148960	49915	59627	805780	190380
0.02524																							34647	39635	49028	93571	67298	7174.2	53885	25667	86723	26032	1242.2	26371	20674	41152	153590	88043	46987	45486	-591.64	18929	116870	36286	103500
0.025439																							34556	39957	48754	92546	66992	4426.5	55201	23889	87900	25556	-2415.4	25438	20860	41472	153790	90150	46155	48489	-1947.4	18750	119960	35870	102360
0.02555	694410	233380	410580	1460700	280200	400270	754650	451500	594690	1203700	914500	811660	361440	483450	381390	674000	150760	49616	60863	814050	196950
0.025554																							35528	39205	49590	92518	66625	1781.5	55153	23791	86532	26090	-3481.7	25317	21773	40425	149300	93692	46963	48793	-2372.2	18881	126850	36263	103260
0.025742	691940	238290	409640	1469500	283280	402020	764690	454030	595420	1210000	919740	813670	357020	491130	384060	678740	154520	50262	66962	816790	199600
0.025757																							36377	40394	48327	93527	66347	2080.6	55357	24511	86658	25667	-678.44	26053	20670	40942	150110	93320	46965	49307	-5788.4	20082	127780	35382	102910
0.025856																							36607	40400	48961	93721	65916	-2651.9	55424	25026	86542	26165	-4748.9	25285	21223	41485	147470	93733	48220	50330	-8263.6	19164	130240	35746	103910
0.025977																							35975	40147	48848	93600	65155	429.64	57136	24843	87763	25972	-7627.4	25609	19506	41104	148090	94001	48651	50757	-8540.3	19232	133370	35751	104750
0.026063	700820	236090	409720	1482000	281910	405050	767110	450570	603690	1222400	927220	822330	359280	499430	386670	679240	156700	47855	68783	821590	202120
0.026161																							36216	39652	48782	94335	65089	-1219.3	57987	25175	87479	26292	-11855	26619	20599	41482	148860	94831	50084	51040	-10621	20042	138600	35347	104960
0.026271																							36490	39971	49383	94565	65371	-1288.5	58818	24599	85485	27170	-14587	27603	20424	40661	149400	94583	50061	51004	-10245	19050	137870	36747	105440
0.026288	712300	234460	411100	1488400	284660	406720	775810	451560	605920	1232000	934580	824000	359910	505650	386320	682370	157470	48811	72290	830170	205900
0.02646																							37056	39923	49936	95010	66535	3505.3	58871	24910	86567	26921	-16338	26237	21268	41589	145270	95940	50474	51378	-11374	19766	136330	35666	105840
0.026566																							35755	40104	50225	93342	66457	394.8	60006	25099	87147	26553	-14710	27106	21495	40976	143030	95815	51163	52084	-12034	19834	134700	35534	107450
0.026591	728350	239490	414610	1506100	282050	411180	779960	449620	608210	1240300	941330	824560	361650	515210	392290	683370	159980	46968	71923	833150	212380
0.026701																							36354	39453	50743	93323	65794	327.36	60286	24418	86860	27252	-15359	26995	22019	41860	142530	98538	50639	51697	-12391	18844	131590	36146	107250
0.026774	731910	239910	416810	1511000	284320	410790	789610	454780	608280	1248900	950590	832330	366210	526840	392720	690880	163210	48480	72691	836310	218810
0.026901																							37121	39946	50733	93317	65475	-865.87	60455	24847	88761	27606	-17753	26576	21817	40695	142400	101760	50735	51491	-14251	18264	130980	36000	108160
0.02702																							35816	40866	51847	90845	65350	2298	60451	24783	86585	27009	-18501	26701	22461	41414	144190	106940	52164	52049	-13727	18821	130240	36318	107800
0.027111	746470	236320	421780	1515800	291450	416770	791750	455450	616570	1262300	955820	835770	370640	529910	388160	692370	163300	47849	72598	830400	219830
0.027198																							36681	40394	50558	91875	65740	1461.2	61175	25536	87614	26757	-20404	27198	22330	41229	146160	108090	51784	52585	-14447	18705	127420	35471	108890
0.02731																							36567	39451	50897	88180	65584	-2321.5	62322	24820	87351	27231	-24002	27243	22250	41756	145410	109040	51387	52356	-14837	19330	127320	36334	109310
0.027357	750270	237740	416800	1530100	291220	419170	798140	454970	617400	1271500	962730	844990	371950	546890	393440	696070	164350	47738	71651	836460	226150
0.027422																							37399	38918	52088	86814	64281	-1245.4	62421	25373	88022	27862	-23951	27571	23020	41202	147590	107710	51855	52164	-14549	18714	127110	36607	109990
0.027551	765530	241450	420750	1535400	290490	423150	810180	456570	618620	1283000	966290	844580	375860	557870	393380	699830	168320	47354	72503	836110	227650
0.027618																							36806	40063	51614	84277	65836	-3668	62301	25728	89553	28780	-22252	27298	22074	42515	147280	108060	52910	52502	-15727	19366	130010	35081	111070
0.02775																							37366	39307	52361	83726	64747	-7591.2	62441	25672	91177	28511	-20581	28282	21763	42361	148970	109640	52832	52198	-15173	19532	127710	36857	110230
0.027886	713710	246190	423650	1549100	293400	425710	812840	459180	621650	1289300	976430	854580	375040	569630	397090	699850	167880	52637	70005	841090	231580
0.02795																							37391	40481	52475	84727	63768	-11612	64160	25521	89543	29229	-20216	28010	23003	42264	148590	111830	53317	52117	-14748	19371	122100	36193	111080
0.028077																							36884	41058	53071	84085	64508	-13212	63522	25574	90233	28523	-19947	28302	22244	42604	151630	113010	54999	53224	-14829	19445	121020	35893	111490
0.028091	706580	247050	423100	1555400	294540	427190	816170	459700	623940	1302900	986460	855650	367830	568000	397330	702130	173400	50400	66459	849580	230780
0.028186																							38046	40650	53312	83231	64041	-11705	64004	24875	88768	28521	-20221	27940	22081	42550	151470	113620	54476	52876	-14277	19382	119350	37267	111170
0.028406	720440	254510	425470	1570000	298490	423930	824530	462460	631180	1310100	991670	860730	363540	585030	401670	704480	175320	51901	64659	851950	236430
0.028407																							38309	39931	53684	81508	63824	-13320	65751	26046	88975	29301	-22551	29000	23348	41501	154020	114220	53903	52255	-14079	19556	118130	37081	111520
0.02853																							38188	39314	53652	80134	64008	-15515	65082	26269	90300	30085	-22545	28376	22292	42824	152890	114960	53754	52368	-14268	19761	116080	36481	110610
0.028645	732410	253470	426950	1577600	298290	425460	832030	465160	636710	1316500	1000300	864440	363290	598280	400490	712590	178730	51713	63897	860480	239440
0.028723																							37878	40505	52790	80396	64000	-18582	65196	25534	91424	29740	-25264	28591	23341	43016	150440	117040	55184	52541	-12983	19038	116190	37379	112640
0.028838																							37373	40080	53726	79945	63300	-16103	65654	25529	91596	29586	-27577	29497	22522	43063	149110	117370	55268	53479	-10769	18750	113170	37310	113150
0.028977	756240	255380	423730	1587000	298290	430550	837600	470000	640610	1332800	1006000	869240	364610	614650	400610	713630	182910	55592	64049	865900	243010
0.029056																							37810	39438	53067	79552	63425	-16491	67830	26246	91684	29305	-24426	29232	23044	44123	150070	117830	55800	53398	-9755.9	18617	110850	37311	113460
0.029177																							39392	40675	54307	79790	63793	-16596	68308	25282	94458	29866	-26982	28931	24235	43650	150780	117630	55931	53112	-8232.3	18307	107670	37558	113000
0.029196	758470	250860	430050	1598000	298510	434600	840760	468960	645000	1335000	1008200	872670	355850	625310	404370	717370	183320	53555	60941	869860	245180
0.029299																							38914	39325	53894	79842	63953	-18841	69082	25855	95509	29613	-25395	29769	22233	43070	149820	117170	55621	52572	-8355.6	19206	103030	36816	112700
0.029493																							39168	40085	53784	79407	63387	-17709	69671	25681	95845	30123	-25176	29665	24573	43348	152060	118470	55925	52922	-7350.9	18044	100410	38248	114070
0.029529	760060	253950	430890	1604700	301780	436370	847750	478550	646460	1346300	1021500	876880	359520	640980	408190	720270	184750	52719	62790	870770	255310
0.029624																							38921	40055	54339	78897	63022	-13633	70823	25722	95832	29393	-25605	28545	24857	42722	153150	118690	56451	52448	-3366.8	19964	97221	37593	114330
0.029775	768220	252580	431370	1609300	302650	437110	852840	477080	648280	1358600	1028700	881300	359590	639390	407820	723400	188620	55539	61774	876690	255940
0.029814																							39023	39873	53665	77889	63265	-12031	72280	27568	96945	29387	-27669	29152	24052	42162	152050	120050	55876	52490	-3739.1	18397	96690	38567	115070
0.029937																							39880	40260	54313	76810	63732	-10797	73052	26706	97063	29559	-28263	30367	23731	43110	153180	118950	56622	53780	-623.05	19630	93117	38391	115610
0.02997	777540	250100	437370	1620900	302440	438200	865780	478810	642880	1367900	1036100	885940	357510	656290	412390	727600	187080	53662	60875	883490	261310
0.030045																							38588	39745	54407	79507	62807	-15045	72096	26043	96803	29671	-29048	30123	22720	42823	153240	118710	58176	53831	393.89	19683	91943	39226	115740
0.030264																							39900	39351	55110	79705	64328	-15126	73118	27865	97897	30565	-30811	30269	24348	43874	149890	117390	58406	53775	2989.7	19447	91936	38903	117150
0.030352	790470	256650	434900	1632800	306960	442630	872480	488840	637580	1378600	1052400	890890	358740	664070	414610	730490	188270	54319	67785	889550	262810
0.030371																							39599	39319	54538	76290	64504	-10627	74407	27114	97721	31117	-28861	29677	24467	43401	150910	117260	57786	54804	4692.1	19522	89568	37329	115880
0.030508																							38653	39511	55183	75852	65207	-11807	74639	27480	98652	30301	-28962	30503	23858	43663	149640	117870	57532	54706	5821.6	19215	86522	38568	116230
0.030563	789060	265960	440600	1639500	305650	442350	876090	488830	623920	1389700	1052800	897410	361950	666700	412660	734900	190860	57356	62815	896170	270880
0.030711																							39119	39269	54435	75206	63784	-11886	74807	27390	99596	30251	-28820	31145	24209	43629	147860	115260	57886	54451	10438	19406	82943	39364	117000
0.030833																							39924	39178	55375	75747	64145	-15504	75187	26761	99986	30615	-28849	31065	24060	43613	148220	115240	57503	54181	10402	19401	82753	38820	117340
0.030927	799920	263470	440820	1650100	308600	447040	887000	489390	620770	1393000	1064000	901420	359420	667770	417550	740560	196710	55879	62316	902910	271540
0.031046																							40121	39486	55707	76736	63721	-16257	76712	27860	101530	31358	-28454	30478	24448	43447	148840	115650	58408	54408	12528	19278	80542	39199	118010
0.031172	805390	264520	441730	1654200	311820	454970	891620	496000	616450	1398100	1066800	906380	350720	674320	416570	741100	196790	55462	63267	903100	279120
0.031179																							39740	39341	56625	74675	64408	-15954	77281	27915	102720	30346	-28789	30531	24254	43855	145070	114570	58883	54883	17012	20351	78906	39587	119190
0.031384																							39874	38223	55979	76406	63039	-19055	77143	28182	103130	31068	-29426	32346	24272	44227	147900	113330	59280	56147	17743	19361	75852	39731	119710
0.031495																							40170	40391	56079	76379	64149	-19484	77357	27647	102240	30921	-28852	31367	24285	44172	147530	112640	57156	55449	20482	19688	74921	39487	119610
0.031502	800750	266950	441490	1666100	311670	449420	902310	499010	622020	1409300	1077900	910310	351070	253470	421150	747050	199100	57093	60673	911950	284430
0.031653																							40073	39647	56560	75950	63022	-20952	77518	28056	101940	32011	-27991	31121	24699	43765	148820	111320	58693	55419	22036	19583	71731	39511	119990
0.031744	798300	261530	443540	1672900	314880	454720	907820	501640	618470	1410800	1088400	914600	350730	269920	420920	748750	199310	54623	60560	914010	287300
0.031859																							40030	39629	56916	76393	63313	-22619	78065	28341	100380	33137	-28582	32620	24843	42937	150510	110330	58778	55525	25688	18872	71039	39721	119850
0.03197																							39820	39070	56638	74892	62894	-25977	78409	28033	101210	32223	-28340	31606	24788	43787	151070	110090	59961	55945	25549	19718	69967	39918	119700
0.032093	794040	271500	446070	1682300	317130	459640	917260	509140	620270	1422300	1095400	921210	346340	281600	424810	749000	197170	56639	58391	920820	291940
0.032201																							40184	39144	56764	72703	64156	-30186	80047	28491	101090	32016	-27923	32039	24579	44258	152840	107270	59434	54368	25555	19755	66248	39082	120270
0.032304	812690	273060	446570	1686600	316070	459970	923160	505420	621370	1435200	1101100	923160	341500	287960	425940	751560	201390	55875	56534	920560	290750
0.032325																							40340	39372	56326	74095	63087	-31941	79086	28417	102010	32419	-25407	32431	25055	43414	152030	104430	60219	54771	26083	19381	64304	38940	120200
0.032451																							40914	40241	57593	72926	63516	-34811	80580	27804	101340	32499	-25777	32078	25118	42896	153360	101570	60476	55436	28539	19517	62504	40403	118310
0.032516	816550	272340	446480	1696900	318000	461150	935130	510120	623690	1443000	1109800	930060	341910	299190	427990	754890	199570	56875	54749	930690	298730
0.032669																							40556	40285	58511	73711	63543	-35359	79967	28101	100730	33009	-23729	32506	24772	44028	155060	100610	61361	54592	32071	19293	60843	39286	118430
0.032819																							40794	40284	57904	73472	64260	-33557	81385	28412	99895	33122	-22511	33556	25704	43194	152890	98449	61818	56268	33402	20495	61255	40219	118710
0.032896	821530	278850	451430	1704800	321510	466160	937570	509470	624850	1446000	1122900	934530	337860	302180	429740	759530	201330	57195	54178	934900	298850
0.033033																							41992	39904	58810	72098	63474	-35452	79959	28455	99878	33726	-22204	33182	26206	42904	153700	97157	61830	54468	35149	20100	57867	40010	118950
0.033112	832760	274140	453300	1713400	325160	468600	946230	512290	627220	1460500	1129900	936980	333120	312860	432850	765940	204430	59681	54728	936730	301480
0.033161																							42063	40740	59436	71788	63414	-33271	80129	28271	99677	33827	-18698	34020	25832	43308	153200	94201	60522	55325	34682	19483	57567	40337	119370
0.033284																							41729	40724	58715	72846	63702	-29091	79044	28309	101010	34249	-17329	33550	26221	43650	152360	90230	59138	55803	34814	19914	56136	40893	121040
0.033495																							41702	40583	58546	72985	63673	-28704	81393	28612	101120	33230	-16092	34094	25212	43998	151530	91344	59765	54438	36503	20478	53571	40210	119430
0.03353	836760	281600	453090	1723700	322320	474080	957800	517280	628150	1468400	1142200	945970	331620	312680	430910	771610	201990	58107	57218	938020	308550
0.033635																							42573	40651	57372	73106	63300	-29848	81067	28584	101010	33218	-14538	33840	26101	44844	151150	87629	60125	54764	38212	19742	52196	40537	119890
0.033769	836630	279650	455160	1727600	326620	476130	965120	513410	627480	1471500	1150600	948080	332730	317320	438500	776520	203430	61916	57975	931400	311540
0.033841																							42488	40732	58249	73927	64031	-29536	80494	27839	99308	34798	-15361	33021	25727	44194	153440	82740	59930	55192	40275	19765	49321	41246	119630
0.034002																							43127	40954	58265	74316	63641	-28669	80973	28482	99016	34667	-14398	34231	26062	44971	153790	81661	60711	54283	41683	19933	48529	40559	119660
0.03412	854910	283660	457910	1732100	327710	477460	972720	518340	628430	1481400	1160900	954230	334390	324890	439020	780350	201980	60198	56692	930030	311800
0.034123																							42940	40418	59344	74955	63403	-30407	79637	28826	99008	34469	-13728	34397	26287	44262	155310	77175	61678	54586	44186	20162	46305	41253	119870
0.034344																							42886	39783	59922	75459	63354	-32048	78866	28606	99534	34533	-13620	34800	25731	44122	154330	69798	61137	54393	44752	20074	44759	40860	120580
0.03438	855620	282010	458030	1739000	331850	481770	982180	520890	631780	1485400	1173500	961200	331980	332710	444030	782320	202510	59511	57155	940310	315560
0.03448																							42282	40964	59020	75054	64095	-33299	77656	28477	99872	34917	-14177	34789	26819	44494	147850	71314	61505	54852	46562	20489	43565	41285	121870
0.034698																							42157	39851	59911	75254	63361	-34459	78458	28505	94481	34647	-13335	35069	26747	44285	146010	68600	60034	53830	48953	20221	43317	41390	120910
0.034775	865440	283740	463460	1741300	332140	482840	995620	523260	633630	1492300	1185800	964230	331730	344710	442770	787320	202940	60423	58384	942060	316430
0.034826																							42291	41225	60133	74724	63922	-35967	76988	28429	94980	34380	-12484	34719	26382	44617	146580	69441	61020	54687	49425	20788	43241	41533	122520
0.03496																							41995	40387	60455	75652	63707	-37975	77344	29166	95161	34038	-13785	35610	27134	45123	149210	63376	60892	55198	49564	20002	43698	41332	123140
0.035014	868740	288070	462700	1749400	333710	487990	997150	525010	634150	1501600	1190300	970820	331870	353770	445640	794010	202150	63796	56821	943980	318610
0.035147																							42755	40891	60775	75566	64719	-37686	77520	29509	96695	35301	-13817	36107	26135	44418	149610	63210	61138	55109	50989	19790	41975	42144	122140
0.035268																							43531	41219	61322	75689	63360	-37969	76855	28879	96887	35545	-12933	36749	26361	44480	148790	59702	61550	54602	52834	20379	41576	41757	122810
0.035379	878880	284690	459140	1756100	334590	487280	1006400	529450	635740	1499600	1204800	974340	331380	362600	444430	796270	204010	63178	57564	945820	323260
0.035531																							43193	39860	61106	75617	64156	-38272	75805	28412	95633	34715	-14694	36558	27303	44610	148480	60166	60030	55410	52415	20493	39612	41868	123660
0.035636	892280	291880	463500	1755200	334460	491310	1014200	528690	637370	1503600	1209700	982490	331990	366450	448900	804150	203370	62689	57283	944860	328650
0.035676																							43424	40737	61197	75854	63710	-40511	74248	29549	96232	35801	-13583	36141	26464	44665	146860	58397	60092	55956	54671	20561	40280	41525	123400
0.035802																							42640	40602	62085	74616	63688	-43344	74048	28254	95404	35298	-12485	35524	27068	45029	147410	58080	59328	55659	54735	19861	38844	41635	123560
0.036015	896280	296570	464860	1761400	339030	493760	1018600	531580	636790	1504900	1220100	985110	331810	378820	450950	807800	203970	63013	62681	947620	328490
0.036018																							43534	39539	62159	74001	63602	-42761	74619	28811	96489	35234	-12203	36746	25710	44988	141820	59031	60677	56809	56409	20427	37956	41519	123370
0.036151																							43426	41538	62046	73610	64542	-41289	73859	29114	97656	35571	-11587	36634	27188	45673	142780	58248	60446	56694	56566	19570	37483	41809	123170
0.036257	914400	296960	467510	1763800	343060	498670	1030100	535250	645050	1511100	1231600	992990	335430	383630	455260	813160	201280	62972	64127	951210	331790
0.036383																							42730	40052	62420	66677	64904	-41837	73032	28621	97384	35837	-11426	37043	27603	45705	143740	58579	61379	56499	56570	20090	36920	41955	124150
0.036469	917080	296770	470090	1772600	343090	498650	1038300	535090	643540	1514800	1236700	998220	340300	394150	456470	816470	207060	63812	66050	955680	339030
0.036516																							43400	40578	61941	65708	63753	-41255	72410	29603	97174	35334	-8638.1	37122	27669	45584	143450	59620	60862	57122	58517	20563	35758	42540	123210
0.036641																							42667	40580	62669	64125	65005	-41661	73234	28716	99146	35180	-6923.4	37439	28452	45294	143470	56426	61351	57196	58428	20023	32573	43278	124580
0.036859	926440	302200	473720	1772300	345470	503060	1040800	541270	644090	1515100	1248500	1002000	340990	403120	459150	820860	205740	65167	67946	964360	339120
0.03687																							43539	40938	62769	64568	63596	-43309	73220	29039	98890	34891	-5719.3	36891	27957	45412	143710	56357	60852	57676	58078	20100	33378	42548	124330
0.037017																							42930	40549	61978	65265	63159	-41395	71986	28586	97779	35158	-6523.7	37718	26928	45115	144500	55829	62509	57469	58467	20023	31507	42839	125750
0.037115	921870	300750	471610	1785800	346190	504720	1057200	545370	643610	1516500	1257100	1006700	343280	415830	461340	821260	205350	67396	70230	967630	343940
0.037232																							43447	40203	62692	66568	63878	-42030	72840	29233	98379	35130	-6472.6	38394	27563	44896	139870	56570	62805	57088	59388	20313	31291	43299	127280
0.037381																							44039	41186	62780	66876	63898	-42065	72296	29836	99172	34967	-6564.3	37921	27234	45777	139580	55596	60500	57694	58739	20304	30115	43210	125280
0.037505	932010	306850	472170	1793200	351930	506810	1060600	547800	647530	1520600	1269000	1012400	347020	424260	460930	820610	204730	65769	72849	976820	344250
0.037516																							43699	40048	63925	67652	63056	-41980	71358	29867	98585	35878	-4883.4	37957	27413	45800	140240	55350	60087	57678	58531	18823	29111	42678	126610
0.037754	934450	302840	476920	1797800	353810	509300	1077200	550510	646050	1524800	1275400	1019000	348610	437100	465830	820740	203970	65487	73927	977450	342530
0.037755																							44087	41341	63795	67711	62971	-41681	71580	29554	96746	35939	-62.337	38222	27602	44982	140470	55037	59727	57591	58921	20300	29345	42508	126310
0.037891																							43465	40901	63996	68806	63138	-41187	71460	29746	95433	35940	1771.9	38451	27794	46273	141840	55278	60019	57698	58685	20125	28713	42822	126210
0.038133	945010	305510	478100	1803300	355600	514880	1080500	554010	650420	1532300	1288600	1025000	354030	442880	469350	825400	208160	63941	73730	968130	345100
0.038133																							43387	39791	64363	69148	63270	-40271	69840	29573	96781	35792	3412.1	38473	28241	45205	142400	55905	61306	57863	59618	19987	28629	42929	125700
0.038273																							43453	40440	64758	68899	62893	-39655	70012	29880	96131	35850	7073.4	38321	28029	45749	142180	57525	62025	58468	60469	19616	28519	44174	125870
0.038395	944340	305340	477170	1808400	356730	516800	1093900	553340	649970	1535000	1300200	1033700	356960	456480	469050	827000	207740	66359	78839	968660	346550
0.038402																							43700	40580	65900	70533	63230	-40308	68691	30486	96071	36404	6136.5	39759	27379	46096	142400	58169	61009	58166	61023	19823	28050	43136	126470
0.038628																							43381	40945	66609	70420	64030	-38704	67798	29196	95905	36074	9155.8	39165	27782	45148	143130	59914	60651	59281	60388	20274	28653	42817	126470
0.038762	951410	311540	479120	1814200	356760	521010	1101300	558050	651180	1538200	1313600	1037700	357210	462320	471410	820530	208470	66855	79290	962770	350010
0.038776																							42781	41443	65804	71809	64116	-38524	69670	29804	97010	36094	10678	39869	28892	45767	143950	62262	60106	56811	61010	19304	28167	43028	126530
0.03901	961350	310930	479820	1812100	360690	522960	1109200	558680	654520	1541600	1327000	1046200	354900	475770	475980	819210	209500	69316	81183	963540	352010
0.039035																							43970	40922	65589	72480	63527	-37933	67311	29462	96804	36404	13120	39386	28644	45931	143590	60656	59790	56664	60815	20007	27823	43079	127180
0.039163																							43355	40640	65740	72415	62942	-38014	67786	29854	96845	35442	12563	39812	29158	45327	141000	60676	60597	56404	59902	19520	28414	43823	126910
0.039232	968310	307920	481300	1816600	363650	527610	1120800	556570	657990	1545700	1334700	1051100	360610	485890	477920	827030	210520	68869	82073	974160	356360
0.039307																							43526	40763	66554	71705	64320	-38277	66587	29355	96928	35813	14524	40393	28249	46337	141120	60994	61325	56166	61916	19866	27371	43305	127690
0.039552																							43253	41208	66768	73203	63766	-37959	65222	29465	98212	36059	17520	40643	28685	45725	143650	61723	61862	56864	61360	19788	28379	44088	127490
0.039614	978890	318200	484480	1819200	365900	526190	1131500	562020	657700	1553900	1347300	1054200	361050	495920	481450	824920	212800	67387	86214	972190	349930
0.039709																							43955	40084	66682	73560	63232	-38118	63738	30553	99326	35295	19273	40287	28595	45957	143480	61187	62659	56333	60565	19303	27876	44038	128430
0.039853	993160	316610	488460	1828600	365340	532040	1143100	563000	658520	1559100	1355000	1063000	365340	505560	483890	820980	212750	69449	88415	974590	356370
0.039924																							43532	40702	66774	73452	63203	-38378	63830	29954	98398	35351	20231	39948	28693	46273	144320	64385	61936	57002	60729	19697	28344	43866	128530
0.040083																							44053	40513	67172	73663	64301	-37636	63687	29748	92140	35651	21711	41087	29236	46300	145510	64836	62900	56208	61107	19365	28448	43833	129500
0.040208																							43593	40925	67302	74273	63400	-38004	60436	29863	92869	35541	22813	41209	29162	46859	146890	70956	62931	56808	61434	19656	29285	44183	128870
0.040281	1000100	318960	486850	1837200	368480	536790	1153200	564050	663630	1563500	1364500	1068100	368360	520210	484960	823050	214040	69411	85110	976280	358760
0.040455																							43592	41326	67221	73323	62892	-36079	60048	30656	93106	35002	22862	40943	29195	46864	145380	70219	64436	56796	60966	20173	29619	44227	128200
0.040527	1008200	318630	489000	1840400	370990	539520	1155900	568520	660720	1572300	1374200	1074200	367150	528360	489890	827920	214240	70739	86517	970340	359910
0.040602																							43467	40463	67998	73811	62688	-35706	59768	30163	92928	35832	24510	41387	29126	46539	138600	74381	63541	57055	60890	20104	31066	43931	127290
0.040879																							43203	41128	67972	73367	63515	-37192	60093	30920	93583	35689	24948	40766	28336	46839	139240	74966	64195	57914	61574	19398	31335	43883	126850
0.040918	1013400	322360	489810	1848700	372780	541420	1171700	568610	663250	1572200	1386400	1081200	368780	536550	489410	835450	215830	72394	87256	969430	363740
0.041024																							43147	41760	67945	73318	62998	-36838	59912	31308	93459	35872	25178	41273	29512	46844	139380	77726	63111	57294	61495	19977	32215	44365	126820
0.041167	1016100	324580	495280	1850400	377770	544820	1177400	572970	669780	1575700	1399200	1091900	366020	542980	494070	840450	218610	73775	88945	977860	363930
0.04118																							43675	41507	68287	74213	62756	-36801	57751	31322	94631	35477	27375	41358	28985	46052	139770	78515	62612	57595	60656	20298	32482	42975	127390
0.04141																							44110	41436	68459	73563	63476	-35177	57164	32714	93968	36258	28403	41338	29026	46362	140170	79177	62918	57255	60909	20271	33282	43676	128340
0.041443	1016100	321760	495150	1855600	379500	547830	1183300	575730	670640	1574700	1402700	1094600	366120	544530	496470	846910	217960	74952	86322	982200	359780
0.041563																							44416	41140	68447	73291	63874	-32988	57809	32059	93990	36550	29720	42197	29465	46268	140810	85791	60572	57181	60708	19799	33705	42800	126800
0.041827																							44429	40997	68750	71779	63263	-33838	58364	31982	93803	36918	28516	42699	30118	46567	141350	85350	62154	57569	59917	20276	32956	43233	126880
0.04184	1033200	323990	495910	1862400	380700	548860	1194600	578520	669160	1578900	1417400	1105400	365790	562710	497740	854820	217790	73642	85429	978040	357870
0.041968																							44343	41677	69034	73686	64144	-34369	56848	32021	94289	37082	29945	42680	29333	47423	143210	85610	61391	57648	60023	19946	35241	42725	127250
0.042111	1044500	326380	497740	1862000	380540	549560	1207700	580360	677130	1582900	1426800	1108700	366310	572000	501020	858800	220730	75146	88285	984410	354420
0.042198																							44981	42398	69925	73027	63193	-33542	55572	33038	94646	36083	31107	43329	29312	47833	143780	85232	62128	57356	60100	19918	35401	43085	127840
0.042379																							45023	41277	69122	73272	62505	-32323	55397	33021	94554	36014	31880	42611	30016	47975	144630	87207	62129	57547	59184	20491	36712	42829	127110
0.042511	1048000	330840	498380	1865200	382760	556270	1213100	582330	680760	1587300	1438300	1116000	367960	585230	503190	865400	226000	77872	86045	984360	353510
0.042521																							45043	41571	69965	74429	63500	-30991	54697	33606	94203	35996	32924	42908	30418	48076	145870	88122	61483	57121	59231	20340	38151	42814	126670
0.042744																							45101	40891	70186	74496	63582	-30666	53238	33777	95179	37103	32837	43759	30283	47399	146090	90704	61783	57336	59050	21063	38264	42794	125760
0.04277	1047500	332650	502950	1867600	386830	556550	1226700	583190	681140	1593900	1445300	1122300	370880	592060	509430	875410	230620	75809	86534	997000	361520
0.042894																							45030	42457	70458	75412	64218	-30814	52631	34153	95873	36665	34441	43990	30678	47193	143820	92670	61984	56973	59291	20293	38283	42869	126270
0.043168																							45558	41920	69916	70568	63775	-30355	52435	33460	95245	37036	34253	44432	29998	47537	141890	94545	60949	57235	59563	20150	38869	42742	127220
0.043239	1053400	332590	505260	1874300	391080	559580	1232900	584740	687690	1594600	1463500	1126400	368890	604870	512280	881070	229910	73052	88629	995700	352260
0.043324																							45780	41523	71293	68104	64081	-30513	51445	33983	95558	37088	34876	43872	30052	47029	141380	95599	61581	57760	59146	20412	39298	42507	126930
0.043474																							46221	40731	71157	66888	63582	-28558	52249	34672	95685	37800	35212	44256	30696	47799	143910	99864	61559	57805	60422	20598	39830	42852	127210
0.0435	1064900	336090	507170	1881500	390700	562740	1243200	588690	689210	1579600	1467700	1135000	367170	612660	512960	884120	232720	76165	87504	1000500	349980
0.043707																							46276	42212	70738	65325	62883	-29207	52076	34567	94754	38090	35268	44956	30316	47481	145480	100720	60851	57649	59969	20528	40657	42382	126820
0.04386																							45981	41490	70410	65597	64069	-29662	52089	35281	95333	37325	36099	44478	30826	47884	144600	100540	61163	58117	59268	20538	41467	42324	127470
0.04392	1071700	341130	511010	1886300	391230	566040	1253600	589920	693100	1585600	1479600	1140500	367100	619220	516200	890690	232740	77130	87146	1000900	348310
0.044095																							46358	41773	71556	65905	63691	-28766	51308	34765	95040	38227	36316	45708	30988	48182	145080	101410	60632	57597	58576	21313	41695	42593	123880
0.0442	1081200	336470	509610	1893200	394020	574260	1260500	588990	696780	1584400	1486200	1148300	371720	623830	519270	901030	232000	78846	86687	1007800	348680
0.044253																							46912	41433	71826	65745	63621	-28270	51921	33717	95420	38476	37363	45474	31071	48349	146710	102230	61109	58473	58649	21187	41928	42362	123870
0.044414																							46922	41797	72011	66376	62043	-26600	51254	34440	95289	37662	35483	44571	30368	48563	147140	103550	62016	58164	58959	21749	42614	43356	125370
0.044477	1085900	340740	514280	1899300	399400	575990	1268800	595300	701340	1588800	1494800	1156100	370030	637310	521530	908910	233430	80380	86169	1014100	347490
0.044648																							47796	41864	72312	65804	63361	-26726	52701	34888	94946	38464	35853	45315	30586	48467	147670	102770	62037	58960	58850	20728	43137	42905	125220
0.044796																							47968	42076	72508	65962	62831	-26564	52299	34835	94462	38446	37466	45537	31182	48540	148700	103240	62322	57234	58953	21141	43704	42107	126120
0.04494	1081300	343080	514470	1901400	398810	579130	1273500	598820	698750	1589700	1504100	1160900	369810	633420	526010	918660	231880	80374	87534	1011200	346440
0.045074																							48953	41960	72653	66704	62911	-27204	52697	34658	95063	37222	37378	45945	31069	48026	148880	104240	61698	57691	60023	20790	43456	42505	127250
0.045198	1084900	344910	518890	1905900	400520	582780	1282500	600260	704290	1589300	1511500	1168000	373610	627920	527770	924270	229860	81703	90941	1014800	353260
0.045223																							48336	41346	72967	67243	62539	-27360	50193	34934	95824	39089	36491	46090	30857	48205	147670	105200	62685	57021	59310	21515	43786	42674	128020
0.045383																							49207	41006	72867	66700	62816	-23948	50981	34707	95610	39113	38206	46202	31385	48458	147800	106200	63587	57622	59880	21380	44157	43065	128610
0.045609	1089800	353000	517810	1909200	402280	583850	1290300	606340	712110	1593600	1519200	1171200	377170	638630	530840	928910	233020	79755	87838	1016400	353120
0.045647																							49810	41685	72803	67507	63594	-23328	49730	34301	96818	38668	38096	46525	30534	48714	146970	105180	62947	58639	59735	21290	44528	43859	127970
0.04579																							51028	41890	74184	68569	62837	-23569	49019	34712	96371	39775	37340	46529	30799	48170	146580	106620	58804	59000	60422	21825	45541	43777	128920
0.045905	1085800	349900	520290	1916800	408670	587380	1297400	609660	710170	1595000	1525900	1181000	375880	650660	535260	934040	233510	82326	92448	1017200	346880
0.04604																							50419	41667	74439	68416	63478	-22642	48969	34965	96499	40170	37490	46266	32163	49575	147010	108160	59193	59053	58669	21802	46255	43842	125840
0.04619																							50978	41925	74950	68518	63236	-20953	48609	33721	97364	39649	38781	47095	31060	49099	148030	109310	60000	60336	59536	21882	46439	44575	125780
0.046325	1097000	349870	524020	1913800	409060	589880	1303100	615380	719640	1591300	1532500	1187000	374980	655480	536960	941080	233250	80570	92802	1018200	346340
0.046341																							50291	42071	74508	69308	62882	-17471	48829	32800	97523	39994	40157	47329	31134	48933	147250	111150	60857	60375	60510	21413	46420	45387	126170
0.046586																							50970	42016	73884	69580	62275	-18102	48148	33823	97510	40459	40165	47893	32679	49011	146810	111600	58719	60908	60028	21734	47075	45411	126060
0.046593	1100600	348610	525900	1913800	411580	593350	1308700	616160	721240	1594700	1538300	1194500	379170	655270	541760	943210	234170	83802	95130	1018500	342280
0.04673																							51649	42000	74643	68885	62314	-17941	48655	33636	96124	39828	41212	47307	32079	49093	145540	112600	58081	60362	60241	22424	47332	45696	125810
0.047024																							51236	41138	74584	67202	62660	-18103	49221	33113	96126	39737	42373	47734	31138	49043	144570	113000	58448	60888	60494	21832	47102	45957	126360
0.047026	1110200	357420	525810	1918900	413380	595810	1316400	620530	730250	1595900	1546900	1198600	381620	661170	543890	948820	237250	84367	95501	1015300	339910
0.047167																							51607	41110	75377	66772	62310	-17868	48419	34269	96610	40772	43363	48043	31646	49546	142900	112830	57154	62038	60259	22310	46908	47523	126950
0.047322	1115000	356330	528030	1923100	414070	600860	1323600	624600	727370	1595000	1553800	1206200	381090	665610	546140	953710	237630	85419	93320	1012300	344990
0.047322																							52457	41896	76153	67028	62943	-17073	47439	32705	97048	40357	44501	48218	31358	49194	144530	112840	54691	60811	61088	22389	46891	46458	128010
0.047581																							52218	41781	76338	67515	63040	-16125	47843	33671	96619	40554	43152	48261	32927	49158	141070	113800	53711	61152	61469	22047	45919	47526	129020
0.047591	1117100	362640	530650	1930600	416290	598920	1332900	626060	719400	1598400	1566000	1210300	383100	682480	553400	957980	237380	85730	95875	1018800	347130
0.047751																							51567	41849	76531	67742	62918	-15713	47461	33415	97572	41069	44067	48723	32382	48970	140240	113490	53667	62424	60799	22450	46140	47338	128840
0.04802	1117700	356340	533040	1930100	419440	602980	1339700	627680	717960	1605000	1576200	1217600	387290	681300	555340	969400	237190	86754	95083	1017300	347140
0.048035																							52109	42214	76994	67556	62964	-15398	47108	33410	98417	40886	45304	49317	33033	48726	140950	113580	53774	62231	61356	22571	45109	47978	127570
0.048212																							51477	41469	77666	67694	62376	-13170	47675	33531	98629	40631	44783	48656	32416	48791	140230	114260	53822	62846	60658	23293	44313	47709	128220
0.048321	1121600	363980	534260	1933000	424130	609220	1345200	632200	716410	1609100	1582500	1227400	390200	677600	558560	974530	236670	85905	94898	1026500	351620
0.04848																							51864	42076	77321	68476	62396	-12376	47821	33967	96305	41107	45768	49757	32873	48814	142300	114320	53731	62936	61574	23305	43912	47815	126200
0.048626																							52051	41996	77576	69070	62270	-11284	47689	33991	96493	41209	45690	49335	31809	48718	141770	115550	53238	62510	63209	23550	42776	47872	126990
0.048761	1129900	360810	537940	1938100	423670	608670	1352000	632800	722290	1614000	1592800	1234600	391380	664430	561670	983000	233810	88001	96076	1022100	357720
0.048811																							51161	42671	77730	69839	62923	-10299	48671	33560	97280	41172	45343	50158	31987	48847	143800	113600	52664	62776	63080	24103	42648	47750	128010
0.04907	1137900	367080	539620	1942000	427130	617100	1355200	633940	718710	1617800	1596800	1244200	395750	649350	564740	987920	230650	88906	96354	1025700	362600
0.049073																							52399	42759	78314	70321	62983	-10964	49035	33647	96040	40679	45366	50533	32656	49566	144900	112110	53720	62959	63159	24486	42006	49472	128340
0.049242																							52299	42551	79264	70620	62665	-9209	49051	33343	96590	41219	46117	50742	32600	49074	145880	112690	54304	62933	63740	24991	41421	49116	128210
0.049501																							52218	42289	80059	70713	62492	-7864.9	48863	34288	96056	42120	46287	51118	33083	49249	144930	114700	54213	63033	64184	24025	41284	49451	129610
0.049544	1143000	362590	543320	1948700	429830	619270	1367100	638960	720950	1620600	1606500	1254700	398060	294710	568360	999400	231010	88821	96646	1027900	366640
0.049676																							52348	42874	79909	71523	62020	-8104.9	48546	34006	95874	41926	46466	50633	33181	48593	145430	116410	54724	63529	63890	24446	41420	50288	131090
0.049812	1153100	365790	543110	1952600	433010	623300	1372000	640400	725050	1622700	1609800	1265100	400610	312850	571580	1005500	231200	90444	96465	1033900	365280
0.049826																							52838	43428	80002	71200	62132	-8639.5	49081	33725	96246	42419	46420	51076	32824	48829	140650	118200	54922	63449	64422	24995	40711	51150	131440
0.050068																							52441	42724	80980	70589	62037	-8001.2	49219	33579	95422	42043	46096	51106	33808	49423	140780	122570	55497	64569	64341	24869	41199	51744	132130
0.050104	1157600	368270	547550	1955000	434780	628680	1383300	643360	728750	1625200	1614200	1275600	399560	317020	575250	1017900	224400	93394	96223	1029700	364230
0.050281																							52141	41782	80440	70931	61555	-10481	49656	33402	97349	42951	48232	51069	33436	49811	140500	123030	55115	63995	65529	25211	40776	51361	131930
0.050529																							53783	43224	80847	71669	61553	-10679	50290	33417	97739	42714	48033	51897	33137	49441	142190	122980	53338	64271	65988	25483	40881	51639	131920
0.050545	1167100	369820	551750	1952800	437520	630310	1386800	642890	727280	1627500	1623200	1286900	403650	327660	580550	1020600	227310	91206	96362	1032300	363020
0.050696																							52631	42270	80899	71634	61714	-11467	49532	33612	97702	42287	48982	51943	33537	49188	141460	128160	53516	64289	66335	25514	40720	51504	133070
0.050828	1169200	375570	552460	1954300	441160	634460	1389400	647710	730270	1633600	1629400	1297300	405970	330330	582280	1024200	225050	90897	99348	1035400	363190
0.050842																							52979	41965	81749	72561	61849	-9121	50338	33743	98483	43051	49023	52982	33583	49470	142060	129180	52449	64632	67295	24860	40617	52491	132640
0.051132																							52651	42764	81488	72710	61635	-8487.8	50805	33630	97605	43739	49690	52688	32883	49488	142500	128060	51619	64496	67269	24435	40648	52729	133550
0.051283	1178600	372870	553080	1957200	442500	639190	1397100	650490	731960	1634200	1635400	1303000	408790	332840	585140	1030300	228010	91223	105160	1038500	366510
0.051344																							53437	42400	82045	72326	60698	-7861.2	50172	33650	96074	43307	49895	52468	33884	49674	143030	130350	51856	64242	66383	24996	40041	52460	132820
0.051606	1189200	375030	556900	1955800	445300	643220	1400100	654680	732710	1628400	1641200	1314900	410630	334490	591380	1035800	226990	93079	106890	1036900	366800
0.051624																							54061	42620	82931	71250	61775	-9017.7	51101	34000	96544	42969	49549	52849	34078	50082	143840	134800	51207	64462	66284	24938	40514	52765	134330
0.05179																							53953	42291	83764	71436	61470	-8163.8	51140	33683	96617	43753	50748	53260	33418	50338	145150	137010	52138	63437	66151	25398	40134	51906	134450
0.052041																							54049	42587	83446	71859	61879	-7807.6	51163	34596	97139	44209	52255	52612	33420	49881	146370	138110	52585	63463	66816	25585	41380	51760	133570
0.052054	1193400	385580	557730	1959400	450390	645860	1411700	656220	738590	1636200	1651900	1321200	413450	338190	594070	1036600	230350	95021	106870	1036200	368970
0.052205																							53427	42566	83453	71957	62174	-7323.5	50808	34968	96967	44032	51925	53432	34019	49755	145380	140460	53003	63407	66328	25018	41137	50220	133030
0.052338	1180600	381700	561560	1962200	452270	650890	1420500	661180	740320	1637200	1659400	1328100	415270	344290	597210	1033800	231730	96306	112870	1036100	366380
0.052375																							53782	42516	84227	71128	62333	-7631.2	51245	36261	97190	43507	52479	54195	34121	49657	145510	141690	53587	63254	65555	25981	40827	49722	133390
0.052648																							54034	43074	84863	71509	62009	-6443.3	52143	36834	97616	44779	53037	53656	33905	49941	144460	141560	54135	62859	66386	25080	41976	49265	133720
0.052808																							54052	43482	84972	71624	61717	-5140.9	51474	37001	96546	44989	53502	53711	33990	49974	142240	141880	53476	62803	67895	25611	41122	49365	133290
0.05287	1183400	381510	564330	1960800	453440	652480	1424200	662790	742230	1642300	1666400	1335500	415550	338210	601060	1036200	233330	95386	115350	1041800	366490
0.053093																							55500	42524	85625	71804	61992	-4562.9	51913	37183	95172	44359	54072	54258	33611	50016	142510	142110	53548	63744	66900	25901	41116	48810	134090
0.053192	1173100	386130	566140	1941400	454330	656960	1430800	669870	746660	1644600	1669000	1344600	416110	338190	605020	1037100	234470	97527	113140	1051700	366960
0.053254																							54513	43029	85759	71784	61937	-5192.3	52380	37322	96104	45105	54123	55234	33985	50243	142850	143330	54371	63043	68163	25825	41404	48549	133380
0.053429																							54779	43150	85767	71150	62048	-4103.8	52843	36577	96539	45160	53668	54995	34282	50382	142300	145640	48319	63516	67765	25320	41151	48413	133820
0.053516	1142200	387950	568140	1941700	456690	659000	1430100	677310	750500	1643700	1668300	1350100	421600	343760	609030	1034200	240560	98097	114420	1054200	368440
0.053699																							54856	42778	86886	71301	62728	-3483	53636	37986	96581	44956	53682	54920	34775	50293	142890	149030	48118	62674	68216	25351	40682	48717	132780
0.053882																							54648	43144	86758	71834	62995	-2143.9	53656	37919	97461	45227	54326	55584	34047	49963	144620	148950	48429	63909	68399	25277	40862	48850	132480
0.054016	660460	392920	569880	1929800	459000	662030	1433900	677370	749380	1644500	1677000	1356100	421260	353230	614720	1035000	241850	99662	114960	1056400	366040
0.054138																							55269	43665	86983	72090	62619	-1488.9	52904	37173	97058	44372	53588	56096	35280	49973	144370	148410	48289	63259	69379	25784	40361	48713	132590
0.054313	676900	390150	573620	1923100	462780	666830	1437200	678370	753340	1647700	1680700	1368700	424330	354490	616430	1035400	247990	101330	111420	1060600	367700
0.054314																							55026	42621	88111	72285	62650	-464.75	54232	38934	98152	45061	54197	55871	35301	50182	143970	149630	48257	62194	69823	25376	39995	48572	133170
0.05448																							54883	43156	87526	72599	63038	568.19	54971	39065	97620	45014	54037	55914	35198	50706	143410	151610	48545	61768	70715	24730	39471	47420	133740
0.05474																							55250	43762	87726	73338	62341	1298	56158	40027	97934	44740	54795	55897	34917	51451	143820	155400	48761	61790	71494	24698	40304	47752	135090
0.054794	675190	394970	576310	1928000	465860	670590	1447100	683910	751610	1647200	1689100	1372400	425040	363820	621880	1039900	253210	102390	112840	1062800	369550
0.054931																							55741	43838	89092	72891	62686	-486.05	56639	40879	98488	44816	54896	56870	35575	50978	144060	158510	47999	61539	70756	24917	40272	47301	134640
0.055092	677860	393890	580980	1911300	471120	674200	1449400	686690	754030	1647100	1695400	1384100	426110	370450	624560	1046900	252210	101780	114070	1075300	374260
0.055193																							55547	44601	89611	73720	62259	-271.48	57517	41567	98323	44055	55719	57008	35073	50788	144920	159950	49185	62032	70834	24827	41238	46741	134950
0.055365																							56215	43137	90334	74365	63174	-590.96	57364	42119	98268	45075	54426	57151	35191	51138	145500	158790	49611	61861	71342	24719	41728	46733	135500
0.055547																							55740	43571	90515	74296	62236	1504.8	59073	42584	99199	44842	55554	58176	35636	50866	145440	163280	49124	61577	72521	24700	41924	46405	133710
0.055597	692580	399160	579840	1901000	471810	679310	1454000	688480	756440	1650300	1699300	1386600	426860	382740	628380	1047100	261800	101220	112450	1075300	374420
0.055839																							56352	43625	90648	74650	62809	2509.9	58984	44010	99398	44943	56410	57630	35867	50548	145670	163910	48748	61532	71741	24433	42493	46055	134060
0.055875	699880	396980	584380	1897900	472490	679940	1460000	691460	758550	1650300	1701200	1400500	427350	390610	633770	1054500	268490	103620	112930	1083900	375430
0.056014																							56759	43507	91421	75949	62609	4794.6	60197	43936	98794	44601	55575	58054	34972	50862	146480	166220	47507	61935	72270	24187	43036	45925	134750
0.056178	712560	397250	586370	1895800	477340	685350	1465600	693220	763070	1652600	1700800	1409000	429910	399600	636680	1060100	277960	104120	115340	1088600	374970
0.056278																							56286	44141	92232	75653	62782	2939.9	61651	44517	99700	45048	56194	58996	35972	51444	145370	166680	48005	61587	71836	24655	43283	46013	134630
0.056489																							56392	43916	92153	73892	62678	2943.7	60752	45798	99756	45521	57461	58844	36098	51319	146460	166020	48394	61481	73057	23993	42743	45074	135150
0.056641																							56672	44030	93212	73920	63049	3497.1	62319	46443	99948	45557	58013	59216	35677	52111	145610	166870	49010	62033	73438	24210	43502	45129	133350
0.056672	708960	395500	590800	1897600	478670	687370	1471200	697910	765600	1652900	1699700	1423400	430260	404930	641330	1061000	284890	106270	117680	1089900	379950
0.056922																							56503	43907	91671	75203	62679	3412.9	62918	46501	100090	44920	56353	58669	36169	52394	146820	167650	48829	61316	73862	24019	43425	44484	134230
0.057043	705550	401860	590750	1895900	481880	689340	1475700	700950	772930	1656000	1703900	1432700	433590	416910	648510	1063300	295800	106800	121570	1098100	381520
0.057119																							57353	43714	92885	75208	63508	5370.4	62917	47101	100030	45319	55859	59031	35664	51485	147670	168280	47691	60858	74100	24237	43303	44598	133300
0.057409																							57374	44279	93637	78239	63506	5543.3	64455	47693	100550	44542	55444	59754	36001	51681	148730	168450	47650	61489	73766	23823	43840	44531	132860
0.057525	715600	404740	594900	1859000	485220	696020	1476300	703500	779530	1659100	1706000	1441100	435590	423800	650820	1066900	297190	108570	128470	1102100	384500
0.057599																							57604	44197	93977	79039	62413	2364.2	65223	48440	100730	44303	55987	60998	36503	50996	148510	168380	47348	61189	74476	23938	44746	44460	132800
0.057827	724360	405490	595930	1854900	485490	700360	1483400	705790	778250	1662100	1709900	1458100	439170	425970	657330	1072000	306060	107730	131810	1103200	385750
0.057904																							58005	44363	93951	79249	63361	4132.5	65738	49107	100510	44836	54878	59701	36173	51606	149400	168560	47663	61203	75524	23749	45225	43190	132820
0.058084																							57591	44288	94130	79677	63758	5165	66204	49198	101800	44418	53634	60241	36038	51603	145610	167700	46792	61220	74050	24271	45339	44308	134010
0.05827																							57722	44057	94733	80106	63065	5081.6	66985	50302	100710	45354	53113	60299	36746	52411	144890	165980	46264	61031	75152	23132	46237	43817	133770
0.058385	722230	410010	597870	1857200	489050	703910	1484800	710160	783460	1666600	1714500	1467100	438200	439910	659340	1075000	308530	110500	138430	1089100	390990
0.058553																							57968	43934	94246	80050	63341	4549.5	67154	50301	99809	45074	53965	61298	35841	52245	146510	165130	46410	60818	75560	22941	46551	43452	133560
0.058746																							57878	43813	95898	81767	62966	6288	67617	50520	99462	45033	54360	61068	36085	52204	147440	163990	47002	60611	75674	22551	46291	41600	133660
0.058751	721980	410070	602060	1860500	490810	707730	1490700	712950	789920	1668900	1715100	1492800	440170	448940	660900	1079300	315670	112260	143110	1091600	394050
0.05904																							58084	44436	95941	82599	63225	6126.6	67606	50612	99925	45233	54328	61436	37109	52900	147970	160650	46965	60109	76164	22542	46602	41086	134120
0.059218																							59011	44100	96159	83713	63544	5112.2	67422	51238	100770	44455	52610	62614	37323	52760	149900	159990	47126	61043	76019	22390	45591	40757	132130
0.059358	722300	413440	605310	1861800	494310	710800	1495700	715760	790350	1669700	1725500	1508900	440130	459310	666920	1081100	313940	112660	147550	1096500	393490
0.059509																							58605	44901	96778	83722	64137	4150.1	66751	51856	101120	45272	53039	62105	37346	53073	151100	161960	46041	60213	76092	22422	45630	40694	130660
0.059703																							59431	44251	96073	85089	63542	6258.1	67880	52203	101720	44966	53864	62428	37327	52699	151760	159680	46169	61360	76766	22913	44980	39826	130890
0.059759	735590	412310	608560	1869400	496640	718940	1501600	718290	791130	1673800	1732700	1528800	444250	462030	671720	1085000	316040	112810	149310	1099500	394780
0.059885																							59442	43955	97087	84970	63959	5518.9	69045	51916	102470	45211	53115	63042	37588	53122	151690	157660	46256	62838	76508	22626	45108	38864	131630
0.060161																							59300	44925	97181	84228	63358	4357.1	69891	53396	102060	45956	54754	62465	37453	53403	151890	155290	47053	62590	77944	22379	45801	39307	131860
0.060265	733520	419590	611710	1867100	499230	721340	1503600	724320	787290	1673400	1737100	1539800	444630	475570	675580	1090200	313880	115300	147140	1106000	399150
0.060357																							59500	43597	97836	84864	63499	4080.9	69898	53263	100960	45848	54935	62951	37579	53157	153180	156160	46479	63452	77650	22281	44824	37747	130930
0.060577	748510	420380	614140	1867600	500270	726000	1501400	724840	790970	1678000	1745600	1563100	444800	483840	680330	1095500	316750	114320	146640	1109300	401780
0.060669																							59686	44457	99148	85597	64526	3158.8	70441	54072	101380	45953	54699	62622	38139	53014	152910	155830	46878	63978	78179	22102	44647	36915	130540
0.060841																							59556	44078	99421	86320	64155	1827.7	70497	53951	101530	46772	57008	63204	37493	52891	152420	155930	41036	64497	79414	22234	44728	36655	130560
0.061018																							59488	45186	99645	85394	63470	2010.9	70332	53502	102460	47582	57028	63578	37538	53459	152980	154950	41059	64725	78817	22086	44730	35139	129680
0.061179	751090	419160	616670	1862400	505410	730820	1507800	728230	791240	1679700	1752900	1576900	448590	496790	689130	1099300	314760	118230	149820	1116300	400630
0.061324																							60406	44839	98873	85181	62990	2657.9	70181	53442	103310	47775	57852	64146	37987	53974	153870	153330	40859	65751	79555	22119	45298	33728	129910
0.061498																							60284	44093	100310	85897	64865	3664.6	71537	54186	103810	48459	58607	63791	38130	53623	153860	153400	41282	67560	79582	21806	45082	33909	130160
0.061511	753670	425160	620510	1867900	506300	733400	1511800	732550	796200	1683700	1758000	1586800	448920	504630	691160	1103400	309870	117920	153400	1124200	401320
0.061803																							60692	44482	100040	86201	63561	3336.4	71676	53073	105380	49148	59128	64990	38762	53905	155490	152440	41416	66304	79916	21846	44833	35360	130450
0.06201	763450	425120	621150	1875800	509790	737250	1512500	735040	797780	1685900	1759000	1595400	451710	516000	697850	1110500	306050	117020	155480	1120400	400830
0.062019																							60594	44781	101000	86116	63883	2601.4	71955	53414	104900	49642	59122	64622	38880	53711	155780	146130	40805	68812	80899	22379	45394	33909	130810
0.062334																							61485	44764	101620	87608	63967	2551.6	71688	53156	104910	50192	59865	65205	37942	53476	157110	145750	41267	68704	81320	22851	45382	34967	129970
0.062351	767370	425500	624340	1876100	512560	744010	1512000	739200	802670	1693100	1762800	1599300	453050	525090	700920	1108000	308380	118780	157220	1128200	403450
0.062525																							61629	44769	101570	87534	63333	3199.1	71417	52625	105790	49800	60538	65653	37740	54144	158130	143420	41359	70235	80001	21783	44999	35295	130010
0.062683	771430	425890	627010	1876300	513340	748510	1514200	739920	806750	1697600	1766000	1608400	455800	533870	708470	1114300	308020	120350	159550	1131100	404250
0.062706																							61370	44700	102300	87875	63708	2024.9	72163	52234	106090	49899	60840	66056	37806	54577	157930	139050	40747	72115	80101	21527	44863	35723	129920
0.062978																							61988	44732	103120	88769	64133	2051.1	73322	51288	107560	50564	61567	65680	38261	54324	157230	136390	40481	72973	79542	22232	44935	35908	129530
0.0632	769420	428190	631130	1872800	516520	753480	1517900	744260	809970	1699400	1771400	1619000	455250	540480	712990	1118200	308110	120770	166020	1138100	407090
0.063228																							62432	45249	102910	88390	64200	1488.9	72882	51139	108270	50988	61053	66997	38846	53881	157930	134730	41706	73699	79928	21603	44833	36872	130590
0.063529																							62999	44951	103870	89046	64300	2962.4	73465	50782	108060	51304	62281	66654	38199	54227	158500	135250	41626	75354	79938	21720	45351	37646	131220
0.063579	774800	432460	633220	1876100	517670	756100	1526300	747780	813510	1703700	1770000	1636700	458160	554660	717240	1124400	305720	122950	169160	1141500	410210
0.063736																							62673	44444	104640	87947	64752	2777	73243	50584	107640	52276	63391	67060	38559	54563	158540	136180	41588	75495	79426	21611	45247	38152	130930
0.063999																							63093	44550	105270	87710	63996	1504.2	73375	50358	107310	52762	63136	67519	38527	54538	159390	131900	41167	75400	79131	21852	45417	38641	132000
0.06411	782930	428230	635670	1869300	520520	761150	1528300	752120	815910	1702700	1760300	1649400	460690	558560	720310	1128200	300790	121920	171240	1146400	410610
0.064188																							63324	45004	106040	87421	64894	1829.7	72799	49184	108140	53327	63301	67793	38172	54200	158530	127000	41179	76205	79753	21489	44637	38824	131420
0.064366																							63617	44750	108150	85615	64019	1327.8	73175	49545	107700	53372	63933	68622	38925	54884	159340	126080	42379	78982	80343	21706	44834	39791	132420
0.064425	792280	433430	637390	1871600	523480	766970	1529300	754760	821070	1705700	1762500	1662100	460910	564890	722930	1124800	302200	125500	173000	1146300	413000
0.064673																							63663	44516	108020	86082	64457	2743.5	72313	47852	108220	54778	63808	68363	38984	54907	160100	128820	41829	79456	81369	21502	45163	39500	132210
0.064865																							64396	45154	109110	84070	64728	3471.6	72439	46986	107910	54963	64634	68076	39001	54773	160300	126420	41714	82647	81748	21123	44586	40101	131840
0.064982	802320	438870	642380	1853700	526190	769000	1530800	757980	823170	1708600	1770900	1668300	463110	574780	734550	1127600	300960	125830	176270	1153400	415240
0.065172																							64119	44626	109190	84189	64367	6238.6	72512	47562	107350	54917	64699	68701	38535	54698	159900	126940	42246	82930	82617	21531	45139	40607	133190
0.065352	806960	439600	644420	1854100	529130	771410	1535100	760880	824340	1714000	1774200	1679500	465330	586340	737640	1129400	301380	126240	177620	1150200	419310
0.065387																							65171	45613	110590	83411	65225	5858.1	72786	47707	107840	55823	66455	69883	39633	54429	159650	128490	42507	85219	79843	21017	45087	41561	133390
0.065571																							65409	45382	111090	83421	65147	3536.5	73114	46412	108170	56189	66735	69509	38738	54974	160180	127500	42044	86670	79936	21721	45233	41473	134180
0.065715	813910	439500	645570	1849100	530310	778370	1535200	763980	825020	1715800	1773600	1696400	465090	598380	741500	1136400	300050	127420	174790	1161100	422540
0.065917																							64826	44757	112840	84158	64667	5574.5	72277	45583	107740	56282	67628	70093	39008	55068	161020	124030	42005	87224	79765	20683	45366	41993	134750
0.066108																							65402	45706	113170	84862	64912	5107.6	71933	44922	107780	56151	69165	70413	39454	55438	161090	124150	41994	88556	80572	21602	45639	42712	135220
0.066258	820650	440080	652320	1846900	533440	780740	1538600	766860	828290	1720000	1780500	1703300	467300	596530	745890	1138700	304030	128470	171100	1163300	422960
0.066416																							65027	45417	113040	84866	65573	6028.4	72045	45101	108330	57671	69678	70902	39120	55077	161260	124230	42261	88780	80942	21266	46031	42962	135570
0.0666																							65849	45984	113010	85002	65420	5462.2	70778	44435	107810	57870	70233	70922	39720	55274	161160	123040	42166	91959	81757	21505	47062	43771	134740
0.066606	827650	444620	651550	1851600	537000	787360	1541600	771370	830380	1720600	1784500	1713900	467790	606020	756930	1148400	305230	127850	161490	1171000	419690
0.066924																							66487	45777	112940	83603	65133	5697.2	70661	43443	107420	58928	71257	70775	39912	55546	161100	119920	42340	91396	80872	21143	46470	44211	134920
0.067143																							65700	44742	113130	84353	65276	7686.9	70537	43172	107990	58986	70347	71593	40294	55896	158610	117950	42557	92779	80985	20602	47382	44338	135130
0.067177	838310	442180	658650	1858800	539200	793280	1539600	772800	832900	1728600	1787600	1724600	469470	606280	758080	1147800	307010	132480	154300	1177400	420670
0.067331																							67170	45194	112840	84359	64492	7738.4	69689	42959	106960	59600	68705	71951	40505	55676	154150	115390	42846	92955	81460	21144	47490	44242	136910
0.06754	843810	446840	658970	1860900	543590	800180	1541300	778490	838900	1732700	1787700	1737200	471370	621310	767010	1154000	309610	131260	139790	1180600	420740
0.067648																							67295	45672	113480	81254	65071	7521.9	70384	41441	106430	59790	69844	72866	39615	55432	153350	115530	42773	93830	79756	21275	48587	46156	136860
0.067832																							68334	45286	114230	81243	65230	6717.3	70339	41435	106170	59567	70107	72278	39467	55578	154720	115710	43572	94467	77327	20683	48233	45875	137740
0.068101	850740	447020	662010	1862000	542610	805250	1539500	780940	842040	1733400	1798100	1745700	473230	628400	769320	1159700	308850	133810	136120	1186700	421660
0.068145																							68944	46108	114980	81767	65934	4122.8	69388	41459	106140	59344	70438	72651	40528	55645	154170	113590	43051	96107	77588	21267	48198	46350	138060
0.068334																							69323	46235	115130	81741	65619	2657.6	70316	41284	106000	58753	70465	73122	39970	56597	151950	115710	42470	97074	76785	20654	48408	46212	138800
0.068455	860740	449310	665490	1853800	549460	806130	1544700	782300	844390	1742900	1803300	1759600	475100	635140	776470	1164400	311730	134050	123870	1192500	424440
0.068518																							69911	46123	116660	82772	65086	782.4	69557	41051	105440	58799	71745	74021	40789	55824	150560	115920	42711	98843	77391	20882	48653	47058	139250
0.068838																							70358	45382	117030	81293	66608	1603.7	68880	40993	105860	58312	72246	74942	40352	56164	151120	113410	42774	100070	77180	20410	48248	47716	137970
0.069051	865410	451870	665950	1846500	548650	812950	1549400	789140	846640	1744200	1812500	1765800	476160	640410	784510	1169300	312560	133980	118430	1196000	423920
0.069063																							70113	46478	117450	82070	65698	2872.3	69249	41428	104440	58588	73146	74634	40336	55987	152220	112460	43368	101830	76695	20493	48352	47623	136930
0.069399																							70712	46277	117810	83130	66290	3543.6	67974	40864	104420	57762	73351	75210	41220	55891	152580	113700	42735	100830	76955	20367	48705	48101	137820
0.069464	874800	450440	672350	1846400	552470	818110	1555600	790260	852880	1743800	1819600	1775100	479710	640580	787400	1174900	315460	135320	107140	1192800	426320
0.069569																							70415	45941	118560	82520	66347	2337.7	68431	41102	104000	58482	74798	75451	40421	56042	153340	111980	42609	101590	77256	20150	48029	47773	138400
0.069921																							71443	46254	119710	83738	65770	3455.2	68514	40512	103070	57798	77913	75915	41100	56194	153460	111970	43131	100930	78079	20823	47838	47623	136890
0.070037	877580	455630	674140	1850600	554280	825400	1556900	794140	853980	1744400	1828000	1789900	480070	634180	796590	1177300	316810	136190	104950	1196700	431410
0.070138																							72021	46604	119970	82749	65855	3612.2	68108	40197	103090	58264	76441	75567	40557	55853	154130	111430	42647	99769	78572	21087	47453	49528	137670
0.070316																							71806	46666	121080	82157	66448	5937.3	68390	40534	104120	57861	75609	75910	40157	55784	155520	109940	42882	99975	78838	20965	47169	50566	138590
0.070395	885520	455030	675250	1846500	558450	827440	1566000	793790	855750	1740100	1832400	1799300	484040	604160	801560	1180600	318580	135460	99972	1204100	435330
0.070637																							71949	46784	120900	84104	66487	6429.1	68528	40340	103390	56930	75718	76962	40919	55798	155080	110530	43140	97469	79131	21286	46630	50707	138540
0.070732	894380	456680	681880	1849100	560670	831350	1569900	800080	862990	1741100	1836700	1813700	484240	588960	809330	1184700	322140	137210	95395	1209100	438900
0.070883																							72612	46951	121370	84287	66361	7834.9	68648	40193	103900	56579	74206	77064	41017	56468	153060	110320	43045	98894	78570	21194	46182	51566	138580
0.071225																							73984	46768	123190	85320	66435	9330.8	68615	41157	103500	56481	74897	76800	40953	55945	152750	110550	42303	98041	79171	21560	45627	51666	138450
0.071325	901710	456100	680710	1851400	563550	837660	1573500	802980	863220	1738000	1841400	1824000	485470	346540	814670	1190600	323880	138410	94305	1214700	444230
0.071389																							74601	46786	123280	85395	66022	8308.4	67898	40621	103320	56227	75641	78037	41660	56697	151500	111110	42499	99655	80160	21222	45111	52765	138060
0.07171	910570	460350	688220	1854900	565330	842860	1579000	803170	868780	1743500	1843700	1836300	488040	362370	822960	1192900	326170	141360	90032	1220100	447810
0.071721																							74552	45821	123370	85902	66263	10355	68591	41235	103680	56286	76449	78065	41545	56297	152790	112560	41741	98656	80257	22129	44730	54191	138860
0.071901																							74487	46598	124200	86155	66031	9085	68271	40759	102350	55274	77200	78796	42004	56954	153550	112150	42556	97707	80419	21677	43614	55261	135930
0.072146																							75368	46364	124170	86531	66288	8275.7	67744	39819	103220	56192	76848	78842	41426	57202	149380	110830	42624	98194	80905	21774	43435	55933	136270
0.072264	914290	459340	689830	1855800	569350	851220	1579200	807700	870310	1725400	1850100	1843800	490140	370180	826920	1196500	328520	139230	90641	1222800	448780
0.072448																							76275	46162	124770	83668	65975	7742.3	68574	39211	102840	56001	76961	79536	41795	57021	149100	111710	42853	98335	81383	22181	42413	59495	135060
0.072649	923670	460540	694020	1860200	570760	853730	1583300	812720	872120	1703300	1853600	1850800	495450	375780	834790	1198800	330240	143420	93937	1226300	446680
0.072685																							76986	46818	124310	84217	66990	8499.9	67976	38280	102270	55504	78251	79978	41862	56825	149330	110350	42962	97834	81961	22425	41914	60575	135200
0.072996																							77156	46933	124900	83376	67088	9614.1	67135	38177	103210	56007	78882	80763	42281	56800	149050	110920	42992	97404	82277	23112	41621	61145	136070
0.07322																							77528	46930	124950	83922	66676	9960.9	67868	37760	102780	55320	78927	80793	41905	56856	149660	112020	43315	98357	82401	23191	40901	62482	136260
0.073238	937650	464410	695790	1861400	574790	860960	1585700	815950	875310	1698800	1862800	1867800	494810	382140	839920	1199400	329790	143270	99654	1223400	450040
0.073547																							78021	46840	125730	82723	66934	10020	68738	37507	102830	56389	78385	81242	42015	57084	151300	112550	43753	97359	83214	23140	41247	64591	136620
0.073594	948390	466290	698970	1863500	575010	864680	1589300	818680	877070	1703000	1866600	1877100	497530	384350	849610	1202600	330640	145560	108840	1224500	450280
0.073762																							77578	46991	125830	81200	66126	10591	68602	37897	103130	56537	78757	81703	43203	57450	150480	111860	43785	97406	83330	23618	40475	66466	137110
0.073914																							78050	46303	126760	79598	66904	9777.7	67712	37437	103370	57240	79258	81848	41904	57606	151880	111890	44199	95746	83790	23814	40018	66519	137000
0.074215	957500	471130	701810	1867400	579330	869140	1592200	821690	881160	1704300	1875900	1890000	498210	387600	855230	1206100	329830	144760	112930	1221600	452610
0.074248																							78395	46990	126930	79288	67345	10170	68158	36182	103760	58197	78773	82720	43100	56914	152620	112510	43588	95227	84098	24161	39505	67869	137520
0.074421																							79490	46408	127750	79817	67234	9895.8	68802	36884	103990	58772	79298	82582	42566	56950	152840	113570	44415	95809	84741	24328	37910	69564	138040
0.074575	967220	474670	703710	1872200	581300	875890	1599100	825210	882390	1705100	1877900	1892300	502090	395230	859040	1213900	335730	146140	123420	1222600	455790
0.074785																							79925	47231	129000	78477	66996	10930	68970	36214	104140	59382	79812	83469	43062	57719	153080	115210	44305	96556	84994	24701	38342	70759	139100
0.07501																							79667	47276	128060	77276	66616	10835	69043	36877	104250	59820	79918	83260	42796	57148	154410	115210	43727	97009	84842	24708	38490	72774	138990
0.075146	971860	475880	708610	1876100	585010	880010	1600100	827330	888240	1704300	1881700	1904000	504290	396330	868370	1215800	334570	146540	132390	1222900	459320
0.075163																							80360	47250	127680	77029	66962	11708	69472	36851	104220	60063	80918	83576	42626	57346	153480	118340	44253	96685	85612	25417	37888	75154	140280
0.075513	979480	477190	711190	1879700	586510	887570	1603400	833120	892030	1708800	1886400	1910500	506440	406630	873580	1223500	334710	149060	147850	1226400	461420
0.075518																							81549	46986	130050	77673	67520	10502	70255	36162	104360	60026	81803	83359	43316	57819	153110	121460	43994	94053	85769	25144	37751	76198	141400
0.075723																							81678	46580	130980	77753	67079	11933	70481	36725	104730	60358	82338	84231	42453	57643	154610	124190	43914	94116	85796	25275	37858	79262	141910
0.07587	982200	478290	714230	1881000	590990	889870	1602900	835890	895460	1708400	1889300	1922500	507870	412820	882900	1227300	338920	149920	156370	1229600	463810
0.076033																							81420	46877	130900	77603	67746	13183	69968	36860	103850	60605	82801	83663	43810	57614	155270	126720	44133	92977	85910	25236	37970	80830	140620
0.076256																							81550	47392	132370	77735	67058	13488	70361	37247	105180	60060	83313	85570	43616	57363	155000	128190	44806	92451	85214	25563	37697	82158	140860
0.076453	992770	476610	716440	1884200	593540	897430	1605100	842180	896370	1710500	1897600	1925200	510250	416720	890060	1231200	338420	151100	161710	1233700	466020
0.076572																							81634	47520	133760	76051	68124	14409	70816	37179	105430	60324	83296	85840	42967	57977	155240	128830	44837	91179	86168	25526	37503	81880	140830
0.076782																							81615	47514	134960	75420	67501	17062	71662	37512	106570	60235	83219	86399	43763	57513	156460	129140	45038	89801	86686	25389	37900	83775	141700
0.076858	1006000	484340	718480	1890100	596080	902770	1608300	844450	900810	1706300	1902600	1932700	513770	422840	897990	1234300	340730	151170	162050	1236800	468220
0.076982																							82280	47388	135360	74434	68006	18558	70963	37899	105140	60613	83351	85937	43283	57850	156960	132700	45271	90237	86771	25686	37208	85498	138950
0.077344																							82893	47459	136770	73554	68251	19155	72911	37492	105080	60162	83251	86412	43273	58215	156360	134070	44806	89292	87441	25073	37232	86310	138890
0.077482	1007700	483010	723730	1893600	598210	909540	1610800	848350	906030	1706900	1907200	1945700	513500	428570	905170	1240900	342210	153830	164370	1240400	473430
0.077549																							82658	47182	137490	74445	67675	18419	75066	37899	104720	61340	82656	87000	43745	57819	155790	134040	44463	87388	87789	25473	37688	86854	138410
0.077861	1016100	486700	724650	1896900	600180	914680	1614600	853300	909370	1709400	1910600	1952600	517480	430370	909780	1242500	345230	154690	164030	1244500	476200
0.077898																							83369	47020	136770	73736	68136	19006	74230	38414	105810	62166	83212	87554	43958	58218	155350	134340	45135	86805	87897	24475	38280	85932	138940
0.078113																							83631	47881	136210	74252	68918	18651	75472	38879	105960	62943	83664	88258	44241	58538	153460	134670	45406	87070	87688	25506	38421	85314	139250
0.078466																							83029	47757	135100	74071	68394	17861	74912	38052	106420	64330	83770	88427	44355	58522	153370	136080	45275	85657	88585	25013	38514	84719	139900
0.078486	1016500	487900	728310	1896600	604130	917050	1617500	854840	915840	1710700	1916900	1969400	520640	435660	917250	1248400	346480	154200	157660	1241600	474830
0.078694																							84080	48404	135860	73583	68640	19743	74895	38554	105880	65481	83774	89342	43799	58659	153240	135510	45300	82524	88470	25242	39460	84270	138740
0.078888	1017600	490890	732400	1898000	605620	925190	1617200	862180	916230	1712600	1921500	1981400	522220	438760	923860	1252400	348260	154220	157360	1247300	480820
0.078901																							84559	48078	133650	75448	67985	19319	74577	38999	106240	68222	83429	89734	44675	58030	154170	138250	45286	80621	88660	25122	39468	84287	136550
0.079243																							84920	47295	133280	77058	68019	20021	75616	39260	106630	69453	84043	90201	44243	58974	154340	138320	45833	78452	89788	24966	39871	84690	136120
0.079254	1023300	489820	735720	1900400	609080	930010	1616400	864080	920420	1712400	1925600	1995400	523270	440820	932820	1255000	349900	159310	153530	1251800	480920
0.07945																							85553	47766	133240	75430	68115	18262	76832	39720	107490	70641	84032	90689	45053	58943	154030	138680	45590	75930	89855	25507	39662	84463	134330
0.079802																							85788	47942	132810	77898	68979	18738	76799	39509	106680	72399	84504	90372	44712	58915	154390	139480	45152	73023	90153	24907	40069	83374	133020
0.079857	1021700	491150	739600	1903400	612010	936930	1622200	870750	924200	1715700	1931100	2003100	525140	448390	939820	1258700	353060	158470	153300	1254900	485810
0.08004																							87274	48055	132770	77811	67604	20469	76918	40137	107270	72104	83863	91495	44394	59565	153930	140030	45649	72549	90742	25240	39844	83204	131140
0.080279	1023600	494760	740720	1904100	617880	941610	1621700	873910	930600	1714400	1933900	2008600	527360	454010	948530	1263600	353400	158830	156510	1257400	483840
0.080371																							87740	48252	132810	77609	67811	21152	78245	41037	107430	72772	85137	91242	44767	59594	154530	140870	45837	70675	90337	25663	39840	83832	130490
0.080573																							87764	47910	134300	75987	67710	20151	77865	41806	106190	73276	84762	90267	45533	60247	154490	140920	46595	69874	90815	25680	40722	84445	131170
0.080775																							87459	48486	134630	76298	68632	20204	77857	41589	106670	73618	85776	91323	45382	60061	153850	140750	46378	69412	91060	25459	40266	84000	131830
0.080936	1034400	496820	745700	1909700	620850	945880	1613700	878170	932760	1717600	1940100	2026300	532310	465110	954070	1267600	355280	158470	158680	1261300	485220
0.081113																							88171	47911	134130	76451	68625	21853	78198	43224	106570	73512	85106	92236	45268	59882	153340	141170	46641	69843	91043	25595	40309	83078	131230
0.081309	1040200	497850	748630	1911700	620230	954780	1614700	880710	937580	1712100	1944200	2034200	533850	469310	964570	1271500	356790	162080	163730	1252700	482630
0.081328																							88372	48252	134940	76153	68781	23059	77273	42797	106810	72760	84800	92713	45537	60247	153470	141520	46643	69281	90991	25660	39954	83515	130840
0.081681																							88387	48672	134050	74478	68252	23035	77247	44523	107550	72969	84572	93643	45406	60963	154330	142200	46722	66662	91552	26008	39262	83199	130450
0.081903	1044300	498980	750520	1911700	625370	957540	1615600	884350	940610	1713000	1950300	2049500	535450	479130	972330	1277200	359870	162930	163980	1256300	465800
0.081915																							88253	48404	134850	74501	68160	24044	76327	44639	107530	73330	83823	93985	45495	60818	152710	143640	46367	66803	92377	26013	39514	83116	131660
0.082139																							88807	48227	136300	71527	67382	25623	76162	44449	107270	72118	84450	94732	44922	60343	152090	145580	47108	66068	92343	25880	39005	83129	131900
0.082272	1053700	502450	755100	1921200	628960	965180	1616100	889300	943670	1714400	1953500	2056700	537730	489510	981840	1280500	360320	164350	167330	1260900	465230
0.0825																							89263	47999	135460	69054	67386	25359	76717	46587	107590	71564	83701	94916	45589	60623	152870	147610	47632	64894	92431	26320	38823	83170	131960
0.082712																							88572	48040	136230	69648	68031	26123	77267	46323	108160	71823	82521	95776	46089	60560	153170	149270	47064	63410	93322	26051	38924	82076	131370
0.082913	1066000	503470	760710	1926400	629570	972560	1616800	891960	946710	1715800	1957900	2070900	542330	499630	986630	1287300	361920	165160	165820	1269300	466860
0.083102																							89671	48614	135950	67886	68718	24531	76942	47411	108780	71722	82347	96248	46267	60572	154630	150090	47030	62964	93280	26852	38729	81845	132200
0.083328	1072800	509360	763650	1927400	633700	980210	1621300	894350	950610	1723200	1964100	2046500	542260	505330	998890	1292300	364680	167620	167470	1267300	469800
0.083331																							89838	48918	137120	68614	67856	25475	77487	47750	108890	71391	80228	96600	46301	60839	153430	150450	46624	62298	93473	26535	39200	79278	132010
0.083674																							90161	48467	134530	68595	68157	24602	77779	49017	108220	71634	81140	97618	45755	61177	150310	151670	46410	63030	93968	26768	39241	78178	131670
0.08391																							90500	48374	133480	68772	68674	24168	77759	49713	108420	71935	79594	98232	46527	60925	150150	152730	46363	62768	92767	26707	38331	77888	132480
0.083915	1077600	506390	765840	1927000	633760	985540	1619400	899810	960410	1726400	1969600	2052700	544170	518330	1004200	1296600	365630	167550	164220	1269800	466250
0.084236																							90395	48252	133010	68695	68349	23204	78571	49033	109040	71511	78900	98260	46662	61224	150240	153100	46873	62129	93388	27236	37540	76408	133000
0.084281	1081600	507390	771220	1932000	640760	990420	1623500	903160	963720	1729900	1974900	2060700	546680	525860	1011500	1299400	365820	168800	164190	1273200	466200
0.084479																							90921	48401	132100	69346	69279	25320	78254	49077	109240	71751	77000	99542	46790	62065	148300	154040	46523	60720	93194	26871	35856	74831	133220
0.08466	1083900	509590	772100	1934600	640530	997840	1627700	906570	965200	1735200	1976400	2065300	547300	537710	1024000	1304300	368090	169640	166540	1281400	469780
0.084724																							90686	48928	131280	68248	68624	25399	78651	49556	109560	71879	77337	99706	47338	61853	147920	154690	46606	60489	94417	27613	34902	73854	132760
0.085073																							91149	48549	132680	69271	69403	27618	78013	49820	109730	71826	77292	100740	46791	61876	147890	154930	46750	60525	94622	27455	33850	73089	134080
0.085242	1096500	515010	773890	1932800	643280	1003500	1624800	908780	969330	1736200	1985700	2075900	551870	544570	1031300	1309100	369560	171140	167400	1284000	473090
0.085301																							91249	48986	131040	68628	69493	26595	78392	50400	109670	71193	77208	101100	47168	61725	147190	154680	46388	59839	95271	27118	34752	72367	134820
0.085671																							91974	48941	129640	68355	69043	26488	78221	50745	110160	70917	77800	102070	47116	62286	147930	155870	46943	60178	96033	27073	34643	71809	135990
0.085672	1098900	515020	777610	1934800	647750	1009400	1627000	911990	971860	1739600	1985200	2081600	551770	552450	1040900	1314900	372800	171200	171730	1285700	469550
0.085914																							92439	49278	130910	68902	69352	27549	77735	50960	110590	69506	75011	102700	48145	61921	148990	156590	46135	59868	96041	27431	33313	71202	136230
0.086278																							92121	49485	130270	70192	68905	27414	78158	51449	110900	67948	75521	103080	47144	62556	148150	156410	46860	60094	95003	27438	32786	70992	136950
0.086342	1106500	520070	781870	1937700	649250	1014200	1633600	915970	976860	1743400	1988100	2095300	554480	558410	1046600	1317500	373970	174170	172610	1291500	471810
0.086503																							91982	48822	133480	70367	69338	26082	77738	51827	111600	66876	75318	103220	47826	62457	148960	157890	47040	59901	94926	27570	30654	69178	136860
0.086718																							91353	49663	134660	71002	70141	27007	78597	51682	112070	63212	73981	103630	47229	62361	149570	157760	47361	60058	95023	27145	29785	69142	137530
0.086764	1111000	519320	787290	1937400	654160	1023400	1629000	919450	978100	1746500	1990900	2098500	557050	561210	1058800	1324400	375410	175910	175730	1295500	473780
0.087059																							91461	49169	133930	70792	70033	29445	79250	51411	111590	63159	74562	105010	47732	62609	150030	158190	47373	60217	95495	27876	28142	68122	138100
0.087302																							92309	49263	135500	71422	69927	30285	79470	52015	111820	60658	72910	105690	48042	62105	150120	158140	46921	61206	96028	28007	26669	67689	138930
0.087409	1119900	517460	788540	1944300	655330	1026500	1633400	923520	983250	1745800	1999600	2111100	559260	573400	1066700	1328200	376540	175820	177370	1299900	471920
0.087651																							92342	49427	136080	71362	70536	31214	79814	52134	112560	59167	73145	106430	48454	61720	150660	158650	47244	62289	96225	28150	23035	66088	139010
0.087855	1128900	522380	794310	1945300	659660	1032700	1632600	927560	986560	1745700	2002800	2117100	561380	580790	1077800	1331700	377080	177340	179340	1302100	467750
0.087894																							91993	49165	138160	71600	69830	32881	79621	52122	112530	56979	72792	107460	48496	62491	149910	159060	47256	62716	97158	27473	18873	64781	137800
0.088291																							92343	49265	135650	72801	70579	32826	79424	51678	113260	55947	72620	107640	48326	62532	149650	158890	47132	62940	97356	27566	15659	64990	138080
0.088443	1133400	522800	794760	1947300	663470	1039800	1630800	931540	989170	1744100	2012400	2131400	565740	589890	1085900	1337300	380070	178960	179530	1307300	464050
0.0885																							92150	48788	137460	71693	69610	33009	80052	52363	112550	53797	74268	108840	48597	63486	149530	158840	47159	63596	97805	27810	14072	64279	138580
0.088746																							92140	49358	137900	72719	66764	33519	80511	52385	112900	49834	72067	108990	48842	63505	151040	158110	46301	64179	97972	27910	10126	64076	138420
0.088853	1147600	525820	798230	1950700	666650	1047000	1633600	935130	991200	1748600	2014600	2140400	567960	600370	1096100	1341900	381690	178770	181240	1312000	465800
0.089082																							91497	49735	136990	73172	66260	33832	82166	53861	113630	50005	72995	110310	48966	63941	150940	158130	46534	64715	98175	27913	10129	64179	139160
0.089253	1155500	529070	803660	1953500	668350	1056700	1639800	936920	993610	1749700	2019400	2146800	570170	609360	1106300	1346900	383020	180970	181970	1318800	471910
0.089331																							91731	50029	136170	73806	66592	36062	82703	53472	113740	48791	72563	111020	48953	63336	151430	158640	47598	66826	97895	28268	9249	63447	140040
0.089656																							91754	49896	132810	74353	66404	38610	83941	53162	114120	48344	72376	111450	49348	63564	150500	158450	47446	66586	98718	27703	3244.9	64248	139310
0.089836	1156600	529630	804720	1956200	671300	1060600	1645300	939670	998860	1750000	2023900	2160600	573200	614540	1116900	1349700	384390	181220	182670	1320300	475590
0.089904																							91602	49832	131490	74006	66709	39428	86573	53733	114070	47508	73257	112730	49347	63592	150930	158800	47189	67329	98662	28136	4823.1	63369	139060
0.09028	1162200	535060	809350	1961000	673270	1065900	1643400	944950	1001500	1747200	2029400	2168700	576170	629510	1125600	1356100	386410	181720	183200	1324600	479480
0.090307																							90297	49629	131560	74218	66871	40464	88875	54449	114050	46381	73213	112970	48930	63476	150290	159190	48193	68010	98733	28276	926.98	63616	138480
0.090508																							88911	49325	130960	75105	66444	41827	90325	54527	114540	46325	73434	113190	50164	63577	150810	159840	47973	69198	99528	28259	-220.99	63403	139090
0.090752																							89012	49761	131120	74756	67185	44070	91766	54166	114270	46340	72982	114070	49249	63736	151120	159820	48142	69210	99538	28462	-6444.5	63417	138400
0.090937	1159200	533910	812920	1966600	673490	1075400	1641800	948000	1004500	1747700	2036100	2180600	579830	635100	1135100	1358300	387690	184210	184730	1327800	483060
0.091125																							88637	49323	131030	75398	67369	47030	92202	55346	113980	46298	71145	114990	49227	63573	151670	160130	47510	70612	100190	28166	-8879	63992	138200
0.091329	1156300	536370	816130	1967200	678840	1080200	1642600	953220	1006500	1754900	2040600	2184400	581060	644060	1145200	1364400	390400	185410	186180	1328900	484820
0.091341																							88438	49990	130200	76753	66943	49850	93210	55283	114420	46345	71199	115770	49591	64233	150670	160240	48104	72209	100130	28277	-12294	63238	138500
0.091705																							89181	49619	133000	77337	67284	50197	93294	55959	113730	45886	70553	115620	49031	63632	150710	160900	48514	73078	100300	28887	-15027	64012	137900
0.091939																							90475	50094	132780	77737	67523	53293	93502	55982	114150	45943	70866	117580	49043	64222	150240	161890	48448	73829	100860	28539	-20668	64365	138710
0.091975	1146800	534320	819580	1967400	681250	1090100	1648700	954720	1008000	1756000	2047500	2193200	585160	648530	1151900	1367400	392630	185380	187840	1334600	484740
0.092375																							89885	49478	132770	78082	67882	53530	94646	56407	112650	46080	68468	117610	49068	64328	150890	160730	48942	74885	101760	28769	-21337	64615	139030
0.092393	1146500	535230	820990	1972400	683400	1093500	1649900	957580	1013000	1757200	2041000	2196400	586580	659630	1164900	1371400	393080	187960	188730	1334500	487420
0.092597																							89223	50114	133740	77182	67855	54105	95348	56559	113510	47047	67672	118550	49819	63938	150880	160840	49247	75894	100840	28705	-21572	66065	138980
0.092771	768160	541210	824630	1973300	686380	1106600	1651000	964640	1017500	1760100	2048300	2202000	591560	666920	1174900	1374700	394580	189070	192720	1338400	491570
0.09296																							89546	49977	134220	77475	67347	55558	95905	56212	113060	47093	68481	119590	49714	64041	151280	161600	48771	76050	101750	28428	-23041	66122	139690
0.093212																							89047	50338	134640	78064	67662	56272	96129	56084	113470	47769	65779	119690	49724	64015	151510	161570	48853	76136	101660	28972	-25428	67200	139800
0.093424																							89513	50341	135970	77330	68206	57389	97451	56357	113840	48078	66837	119890	50355	64188	152120	162420	49151	77521	101410	29164	-26510	66795	140060
0.093454	779030	539580	827850	1968200	690490	1110400	1649600	965210	1021900	1764000	2053200	2213700	591710	672480	1184600	1378100	397150	189250	191360	1342000	493940
0.093774																							89257	50246	136740	78513	68291	56115	97527	56531	114060	48802	65900	120730	49698	64467	151360	162800	50093	78446	102020	28938	-28503	67782	139930
0.093823	783570	542900	834410	1972300	694530	1116700	1649600	970600	1025500	1766400	2058500	2221000	595510	625560	1192400	1382300	399840	192930	193510	1340400	497460
0.094025																							89583	50790	139190	77537	67972	60252	98302	57126	113790	49092	66347	121090	50187	64068	151710	162330	50216	79187	102470	28809	-30211	67978	140940
0.094405																							89735	50470	139610	77560	67981	64343	98109	57016	114590	49779	65018	122190	50306	64820	151370	162870	50011	79403	103310	29065	-31604	68720	141350
0.094493	788640	546190	837450	1973800	696530	1127300	1648800	973620	1028800	1770100	2065200	2228200	599670	617030	1208000	1387300	400140	193400	193290	1346000	498380
0.094665																							88806	50515	141430	78309	68807	61353	98978	57568	113670	50893	65671	122450	50128	64893	148870	163070	50519	79675	103030	29400	-35160	69193	141920
0.094981	787750	545250	839610	1975400	697250	1134200	1631300	975420	1034400	1778500	2068700	2233600	603050	615970	1215400	1391200	402060	194670	195950	1353400	504180
0.095019																							88096	50738	142810	76854	69508	60643	98552	58375	111660	52073	63034	123640	50489	64915	148810	162390	51015	79503	103620	29835	-34166	69374	141700
0.095255																							89725	51233	143430	79596	68544	61098	97538	59569	109500	53065	62638	124080	50651	64579	149770	163050	50911	79978	103830	29296	-33494	69786	141010
0.095489																							88080	50794	145870	80618	69358	62046	97837	58683	109310	54015	61037	125700	51069	65239	149280	162110	50488	79914	103660	29620	-33257	69384	139880
0.095699	798310	550610	844660	1972900	700210	1144500	1637500	980450	1034700	1782900	2072500	2240200	607470	621030	1227400	1392700	402520	195380	197640	1342000	505380
0.095907																							88931	50473	145930	81705	69334	61868	94966	59477	110480	55097	60876	126900	51085	65497	148810	162910	50925	79749	103540	29110	-30567	70301	140590
0.096076	805990	549550	846410	1974100	703390	1151700	1638100	984190	1040800	1790800	2075300	2241300	608610	596350	1234600	1398300	407470	197020	199380	1348200	507970
0.096161																							88150	50544	146640	81508	69235	64105	93926	59533	110980	56578	62898	127760	51127	64852	149630	163470	50693	79729	103550	29307	-29648	70752	140630
0.09652																							87727	50399	148030	81325	69548	66809	92759	61680	111310	57641	60543	128410	51423	65128	150610	164710	50770	80199	103940	29689	-29396	71320	141510
0.096737																							87478	50968	149210	83755	69620	71727	90751	62175	110940	58335	57866	128840	51410	65695	151000	165530	50835	80677	104290	29565	-27485	71609	141610
0.09674	810930	554150	852060	1972300	707230	1162500	1641200	986940	1045000	1794900	2079600	2241200	612600	567290	1247400	1400600	407970	198190	199740	1351600	510680
0.097097																							87557	50831	149810	84826	69507	69810	86960	63310	111160	59820	53847	129870	51952	65677	149740	165360	51374	79521	104470	29381	-24404	72041	142210
0.097141	810340	552390	855760	1973300	709980	1167800	1644200	989910	1049800	1803800	2083600	2245600	614610	459950	1258200	1406900	410750	198080	200610	1354500	513900
0.09735																							87589	50977	151410	86880	70019	72058	86426	64430	111280	60607	53800	131130	52562	65275	146680	165910	51008	79038	104700	29225	-23584	72518	142640
0.097552	815200	556060	857060	1972900	714190	1174000	1647200	995200	1051400	1810500	2088300	2242900	618320	465480	1266400	1409300	411030	201850	202160	1357800	515470
0.097583																							87044	51463	152590	87405	68943	71377	86239	65203	107680	60814	53655	131790	52561	65534	146200	167040	51055	78335	104970	29425	-24708	72872	143430
0.097936																							88016	51590	153050	88954	69090	71731	84619	65874	107390	61739	52938	132720	53509	64920	144860	167500	51507	78375	105010	29375	-24390	72956	142800
0.098179																							87007	51383	152880	88758	69238	71021	84664	66496	107410	62472	52724	133660	53428	65869	145330	168230	51235	78171	105430	29781	-25228	73356	143500
0.09821	820500	559370	862800	1976100	714740	1181900	1651300	996880	1054300	1810900	2092700	2250000	619350	473300	1278700	1414600	412930	202270	203850	1362600	516330
0.098604																							86644	51201	154630	89585	69887	70478	83196	66464	107660	64495	53968	134040	54321	65801	145600	169840	50852	78731	106460	30002	-21926	73640	142260
0.098678	827700	563040	865280	1975100	718620	1190400	1655400	998810	1058500	1815000	2095300	2254100	624470	478780	1287400	1417100	415130	203620	203860	1367200	516590
0.098834																							85417	51331	155660	90443	69919	72331	82462	66962	108400	65891	52685	135820	54667	65868	146460	170720	50834	78771	106580	29975	-19127	73675	142870
0.099078																							84965	51873	157150	90884	70031	72549	79991	66942	108140	66765	52998	136630	54590	66238	146220	171310	51757	79023	107010	29909	-17898	73758	143080
0.09933	842060	565690	868760	1977500	721530	1199900	1656000	1006300	1060800	1819500	2102200	2262800	626750	487470	1301000	1422800	415610	204010	205730	1371900	520360
0.09946																							84519	51812	158650	91432	69468	73072	80950	67558	108710	67908	51921	137110	55268	66143	146510	168520	51002	78927	107080	29567	-18265	73837	143070
0.099735																							84182	51761	160360	92487	70398	70833	79643	68083	109790	68420	52566	137780	55897	66232	145500	169130	51698	79418	107470	30021	-15196	73864	143370
0.099784	842400	566640	873290	1976900	722440	1205600	1658300	1007800	1060900	1824600	2106900	2269800	630790	491260	1309400	1421200	417160	206710	208830	1374800	518620
0.10013																							83844	51808	160440	92505	70844	72616	80184	68403	109640	69460	51235	138010	56462	66278	145000	170440	51746	79571	107640	29921	-16884	72852	142900
0.10041																							82882	51827	161720	92658	70248	70851	77231	68721	109200	70376	51390	138530	56752	65926	145450	171560	51828	80103	107840	30049	-12643	72640	143070
0.10047	849030	567910	876130	1982700	724930	1212000	1661700	1010400	1063500	1826500	2115000	2278400	632160	498420	1324300	1426000	419600	207190	209400	1377000	522860
0.1008																							82884	52128	162440	92981	70636	71592	75779	69224	109520	71137	50076	138900	57044	66633	146260	173340	52317	80481	108360	29980	-12743	72429	142720
0.10086	859660	569320	882730	1982700	727410	1221800	1663200	1014700	1067000	1835400	2118900	2280900	636130	500650	1334000	1428500	421460	207460	211010	1381500	522750
0.10102																							82576	51783	162640	93922	70079	72043	73364	69436	109980	70740	49591	140130	56791	66913	145690	173520	52132	81602	108490	30273	-9093.1	72565	142480
0.10142																							82255	51778	165590	94630	70638	71936	73287	69993	110380	71367	49127	140970	58268	66481	145380	174450	51175	82318	108910	30067	-90.837	71879	143060
0.10152	855060	570580	880730	1980500	731250	1228000	1667200	1019000	1068700	1841000	2118500	2277700	638670	509520	1346000	1433600	422000	208300	212490	1382600	525330
0.10164																							82429	51442	166890	94518	69845	71421	70122	69714	110280	71152	48893	141800	58525	66985	144240	175230	51518	83864	109200	30181	4731.3	72132	142760
0.1019																							82092	52031	166750	94852	68957	69503	70053	69470	110510	71693	48744	143090	59335	66769	144690	176420	51769	83734	109530	30585	7954.7	72539	143120
0.10198	864520	568650	886450	1984200	734190	1237300	1673300	1023000	1072400	1846200	2122400	2284100	643860	512740	1356800	1435600	423340	209820	213290	1386800	528490
0.10229																							82448	51847	167830	95023	69192	73215	70232	70131	108930	72227	48959	143640	60043	67062	143280	176750	51857	83564	109800	30211	11293	71943	143330
0.10241	870490	575670	889190	1987800	735920	1243600	1675900	1025500	1075800	1851700	2128100	2287200	645490	516150	1370900	1440500	425180	211700	214880	1391800	527680
0.10255																							82207	52043	169030	94475	69515	72835	69033	69858	109280	72199	48988	144690	61352	67077	141180	178550	52092	85239	109640	30283	12413	72329	144150
0.10293																							82893	52191	170550	94604	69321	71022	67122	70506	107960	72466	49317	145240	62015	67722	141150	180110	51734	85710	108900	30668	15726	72378	144210
0.1031	870530	574730	894420	1989100	738130	1252600	1679300	1030600	1081200	1855200	2132800	2294100	646160	524160	1380700	1445700	428760	212480	216290	1396300	532610
0.10317																							83140	52566	171240	94962	69499	71269	66251	70914	107950	71040	48933	147330	63099	67405	138970	179960	52091	86286	109740	30929	23855	72297	143660
0.10353	877650	574580	897000	1994600	740830	1257200	1684300	1031800	1084800	1858300	2134300	2295700	648550	527930	1396000	1448200	429960	214410	215930	1395900	534980
0.10358																							83768	52302	171740	94331	68798	71348	65723	71122	108890	70989	48880	147480	63285	67220	139280	181500	51971	86253	110400	30406	30989	72379	143780
0.10376																							83808	52389	172290	93405	69136	69851	66383	71230	107870	71326	49167	148080	64324	67012	139520	182280	51764	86846	108800	30369	34987	72461	144590
0.10402																							84062	52240	174270	94884	68786	68648	65202	70622	107920	70914	49517	149200	65287	67780	139850	182460	52041	86209	109420	30945	42374	72964	144440
0.10428	881240	576050	899380	1994000	745020	1263000	1686100	1036600	1087000	1862600	2139900	2301500	651220	531160	1403000	1453500	432740	217350	216560	1401000	537970
0.10441																							84407	52597	175210	94486	69069	65451	65316	70339	107790	70893	49965	149820	66881	67398	141190	182440	51742	86505	110370	30844	51040	73466	144600
0.10467																							84606	52787	174860	94215	65864	69600	66443	71319	108130	71117	50193	150870	68075	67660	141290	182060	52833	85953	110440	30794	59304	73873	144440
0.10468	886970	581070	904240	1996000	747720	1270000	1690600	1041200	1091600	1866400	2145300	2306500	653990	539590	1413800	1459800	434210	217270	218580	1405800	540840
0.10508																							85650	52714	176080	93389	66171	72788	66887	70088	107970	70991	49384	151250	68933	67783	140120	182720	51877	85928	109680	31219	75826	74465	143960
0.10537																							85490	52795	177250	93124	66824	68364	65967	70483	108070	70716	50354	151920	69886	67913	139390	183610	52635	85714	109560	31437	78339	74550	144700
0.1054	891820	579800	905960	1995200	748670	1275700	1694000	1046000	1096300	1869000	2150300	2315700	654780	546030	1426800	1464000	435640	218970	219380	1411900	540910
0.10578																							85456	53123	177660	93121	67120	69800	66949	70415	108410	66453	50182	153110	70295	67843	139780	183720	52478	86219	110020	31070	87926	75258	145050
0.10585	898790	584570	911950	1996100	752730	1283900	1700500	1050100	1100200	1874500	2156000	2319100	658520	551090	1436900	1466900	437470	220340	220490	1408400	542700
0.10605																							85657	53241	179000	93542	66463	71949	67317	70362	108380	65903	50325	154270	71259	67634	139500	183220	52650	84897	110560	30824	96833	75593	144450
0.10644																							85821	53296	179400	92635	66721	74313	67865	69455	108410	66140	51374	154980	71133	67901	140230	183770	51953	85615	110700	31555	103610	75408	144880
0.10651	907530	586790	916590	1993500	754350	1292100	1702100	1052600	1104300	1878800	2161400	2321700	662600	562330	1451200	1470400	439500	221670	223820	1411100	546500
0.1067																							86033	52811	179870	93203	66835	73232	67704	68661	109130	66484	51756	155870	72105	68099	140290	185000	51977	85660	112140	31316	108090	76202	145650
0.10696																							86320	52902	180530	93118	66984	72689	68352	68361	108250	66145	51544	157020	72422	67724	140800	184600	52726	85706	111510	31238	113070	76232	145990
0.10702	909370	589620	918200	1996300	760710	1303300	1703500	1056200	1108500	1882800	2165600	2325900	663350	568780	1462600	1476100	440360	224590	223510	1414700	548350
0.10737																							86449	53195	181630	92078	66982	73634	69035	67951	108230	66070	53140	157500	72676	68296	140720	185600	53125	85671	111780	31426	119270	76956	145990
0.10742	920240	588190	922370	1999400	760470	1309700	1709900	1060400	1114800	1886300	2170000	2328400	666160	578540	1475000	1479000	440960	224760	225950	1422500	550590
0.1076																							87221	53483	181990	92116	66859	68949	70762	67113	108630	66077	53946	158090	72958	68829	139760	185020	52635	85237	112190	31488	124740	77378	145840
0.108																							87124	53742	182460	92144	66481	66161	72809	66142	106610	66117	54009	158910	73769	68798	139760	186430	52734	85998	112320	31801	130100	77723	146770
0.10817	923720	591500	924240	1999000	765410	1317400	1708400	1065200	1119300	1891000	2178200	2334400	669070	579450	1484900	1483200	444130	225480	225300	1431000	554450
0.10823																							88327	54036	182610	90816	67285	70448	74568	65620	104160	66299	53553	159010	74678	69128	139860	186580	52488	86145	112330	31662	133310	77961	146500
0.10863	931600	593910	930780	2001300	767130	1325100	1713800	1068100	1122900	1893700	2182100	2333400	672040	590330	1500200	1489300	445710	227160	228450	1439900	558830
0.10863																							87796	53566	183220	90667	67120	69839	75711	64255	104480	66067	54876	159910	74801	68812	140740	186740	53164	85925	113180	31721	136630	78536	147140
0.10889																							87977	53371	184270	91539	67083	68265	76015	64269	104390	66172	54757	159570	75045	69085	139540	186490	52214	85785	112780	31812	138240	78336	147110
0.10911																							88784	54033	184340	90591	67666	68965	75877	62211	104570	66212	57303	160360	75114	69015	139180	185980	52616	86955	111580	31995	143270	79251	147650
0.1093	941310	595900	931780	2007400	770720	1330500	1712600	1073500	1129400	1896800	2189400	2335800	674330	597710	1509000	1492800	447190	229050	230170	1445300	556480
0.10952																							89091	53621	185160	90597	67022	71676	77230	60765	104460	66166	59114	161610	75577	69073	139210	187280	52231	86985	111670	31930	148800	79347	147010
0.10977	939750	597520	936430	2008800	773080	1342500	1714800	1076300	1131200	1902000	2190500	2339700	676770	605400	1522600	1495500	448270	230930	231630	1454500	557690
0.10978																							89476	53828	185360	89917	67460	75105	78727	59806	103730	66099	57947	161490	76110	69268	138530	186980	52455	87697	111930	32288	151610	79796	147940
0.11019																							90034	53354	186320	90149	67103	78852	79306	59388	103760	66635	59012	161610	75954	69680	138680	183490	52306	87497	111940	31426	155060	79791	147700
0.11046																							90292	54105	186490	90018	67503	75150	80607	58845	104010	66238	58805	161780	77066	69398	138960	182910	53299	88233	112010	32131	158860	80181	147100
0.11049	953200	600080	940920	2012900	778190	1349200	1712300	1079600	1135200	1906400	2198000	2343800	679380	609830	1532400	1499900	449960	230860	233290	1462000	561750
0.11085																							90803	54020	187700	90047	66933	75999	82891	56732	104440	66805	58785	162580	76493	69578	138380	183580	52679	88258	112310	32362	160780	80074	147430
0.11092	961820	599440	941870	2014800	780210	1361800	1714400	1084400	1141000	1911300	2202400	2347800	683120	617830	1546500	1502300	452630	233240	232710	1466800	563460
0.11117																							91164	53651	187770	90489	67196	79273	84950	57093	105100	66723	59155	163770	76876	69606	139900	183240	52968	88905	111690	32308	162200	80062	148030
0.1116																							92205	53884	188390	91632	67077	77638	85213	55198	105160	66748	58620	164400	76165	69090	140730	182260	53709	88970	111610	31935	163020	80365	147200
0.11174	960250	603490	949680	2019000	781080	1366000	1718100	1086500	1145000	1913300	2205800	2352000	686560	630300	1554800	1506900	454830	234360	234140	1467000	565090
0.11188																							93365	54237	188290	92026	66800	79900	86231	54114	105610	66840	58330	164560	75986	69256	142250	181960	53592	89326	111140	32347	164560	80703	146800
0.11213																							93634	54385	189340	92137	66361	81425	87163	53589	105550	67248	60363	165580	75881	69975	142370	181540	53397	89873	110910	32434	163980	80890	145900
0.11219	975530	606960	951760	2022600	785650	1374300	1719500	1092900	1148600	1916400	2210000	2358900	690360	633660	1565200	1511900	456120	235210	235760	1472900	565690
0.11259																							95268	54356	189670	90445	67473	82894	88982	54138	106300	66826	60669	166230	76571	69413	143570	181390	53357	90233	110930	32496	163210	80859	147170
0.11283																							96141	54112	190650	90805	67273	81109	89622	53924	106950	67086	61488	167320	76168	69851	143820	180110	53703	90238	111690	32926	161930	81123	147770
0.11292	982000	607710	955560	2024400	788340	1384700	1723200	1094900	1152900	1922100	2214600	2363200	695290	643510	1579700	1514900	458670	237150	237580	1473100	570670
0.11327																							96896	54266	190850	91965	66830	81022	89533	52852	106730	67507	61679	168260	75475	70221	144790	179510	52324	90658	111460	33057	160870	80465	147740
0.11338	985670	608300	961780	2029100	791820	1392000	1726300	1100500	1156500	1925400	2216700	2368500	697440	650350	1589500	1519500	458440	239370	238930	1473700	568760
0.11354																							97722	54185	191520	91603	66336	82672	90745	53448	107870	66716	62104	169070	76016	70203	144440	178610	52287	90697	111870	32281	160660	80943	148080
0.11377	992040	610180	962020	2031800	794890	1403400	1728900	1103300	1160100	1931700	2222300	2373400	702250	660870	1603500	1522600	460210	241060	241690	1469700	570510
0.11396																							98448	54123	191800	91826	65901	84376	91421	51876	107730	67902	63546	169040	74385	70699	144840	177400	52342	90985	112090	32627	159290	81344	147520
0.1142																							98941	54329	193130	91617	66381	88201	91206	52202	106800	67807	63488	169820	74146	70441	144430	177070	52252	91060	113280	32638	158210	81323	146330
0.11447	996720	611530	969660	2037800	797790	1410900	1731600	1107200	1168400	1932200	2227600	2371900	706130	666350	1613200	1527700	463100	243010	240750	1462500	570910
0.11459																							99463	54575	193320	91862	66658	89646	91941	52573	107840	67656	65661	170820	73648	70824	144120	177350	52819	91194	113250	33136	154840	81484	145570
0.11488																							100720	54925	194260	91694	66245	89552	91863	52862	107920	68487	66025	171010	73866	70640	144190	178510	51948	91557	113270	33219	151620	81500	145660
0.11494	1009500	613450	972210	2041100	801410	1424700	1735900	1111400	1170900	1932700	2228900	2376200	713260	679270	1628300	1533000	463830	243240	242370	1463300	574110
0.11515																							101180	54625	194510	92000	66696	92551	92363	52256	108290	68073	68739	172180	73345	70948	144510	177850	52617	91661	113920	32942	149580	81363	145560
0.11558																							101440	55039	195480	92004	66449	94967	92053	52257	109100	68771	68578	173100	72327	70828	145200	178660	52228	92100	113110	33701	148050	81640	145370
0.11565	1014900	616940	975460	2046900	805790	1430500	1738300	1113800	1173600	1932600	2233800	2378800	715420	683940	1636600	1536300	464540	245120	244200	1459700	572870
0.11585																							101950	55429	196210	91585	67206	93794	92157	53421	108840	68762	69073	173870	70996	70656	146270	179330	52516	92628	112340	32795	145520	81948	144350
0.11611	1021200	619880	980000	2052600	807920	1438800	1734500	1121100	1180200	1934500	2239600	2384400	719470	695550	1651300	1539600	466960	246440	245410	1458800	573150
0.11628																							101630	55340	196830	92277	67382	94524	91933	54052	109450	68663	70461	175270	69937	70963	146290	179430	52018	93152	113140	33391	141060	81651	144450
0.11654																							102390	55696	196860	92521	67069	95986	92233	54135	108740	69009	71025	174870	69629	71516	147290	180040	51732	92982	109220	33604	139260	81624	145350
0.11682	1032400	620320	983510	2055500	810690	1450400	1658300	1122600	1185700	1938600	2246300	2389400	722810	701800	1660000	1541700	468770	248550	247250	1456000	573960
0.11695																							102740	55320	197750	93306	67027	96979	91710	54513	109040	68954	71176	175610	69698	71342	147690	180730	52391	93374	109290	33715	136560	81748	144570
0.11721																							102090	55351	197890	93157	67095	96976	91595	55119	108970	69585	71853	176510	69014	71649	148250	181830	52937	93563	109880	33429	134200	82477	144890
0.11732	1034600	622280	987670	2059100	814250	1458300	1654800	1128800	1192600	1936700	2249200	2392300	726440	708370	1671500	1544000	470790	249210	249160	1454900	572820
0.11746																							103390	55513	198820	93144	67732	97978	92139	55614	109700	69202	73105	177260	68383	71126	148210	182310	52651	93738	108790	33540	130520	82464	144040
0.11782	1038700	623450	991410	2063200	817300	1471300	1657900	1131100	1195100	1936400	2251000	2394300	729680	716990	1681200	1548300	472560	249790	249830	1451000	574510
0.11793																							103120	54997	199920	93233	67186	96561	91967	56006	109550	69627	73644	177110	68057	71450	147780	183110	53686	94001	108690	33204	129780	82276	144570
0.1182																							103340	55975	200340	92786	67899	97541	91151	55859	109970	69863	74154	177560	67692	71649	148720	182850	52605	94207	108430	33723	126300	82672	144660
0.11861																							103500	55800	200820	92065	67768	97322	91572	56540	109770	70057	73768	177980	67710	71733	148930	182690	53298	93981	108660	33815	122960	83241	145610
0.11867	1045200	627980	995550	2067300	820440	1477600	1663300	1134500	1198400	1932800	2255900	2392100	734760	729950	1697000	1551600	475450	251960	251190	1446300	575980
0.11887																							103660	55745	201090	92186	67990	101040	91330	57479	110120	69859	74480	178130	67659	72531	147940	183760	53627	95164	109470	33740	120900	83398	144740
0.11911	1050300	626730	998160	2067100	823450	1491700	1663000	1137900	1202400	1920700	2258800	2392400	739590	736840	1704600	1557000	476680	254790	252700	1450600	574610
0.11932																							103800	55555	202500	91806	67904	103190	92125	57951	109850	70237	74897	178720	66010	72474	147400	184810	54081	95443	108610	33983	119600	83293	144880
0.11959																							103980	55982	203450	92705	67881	102180	91592	58233	110450	70779	76155	178420	66326	71889	147790	185180	54056	95830	108960	33981	115710	83110	144600
0.11987	1064300	629540	1001900	2067300	826930	1497800	1655500	1141900	1210600	1920600	2264600	2375700	741890	749060	1718600	1561700	478650	254990	253820	1453400	576990
0.12																							104860	56386	203600	92356	67837	102150	91747	58766	110700	70555	76294	177940	64756	72600	146590	187320	54546	96070	108520	33867	112010	83470	145250
0.1203																							105080	55936	204820	92982	67673	100360	92219	59433	110860	71148	76287	179130	63132	72419	146520	188320	54555	96398	107920	33803	110900	83860	144100
0.12033	1070000	633110	1007500	2070200	831640	1505200	1650000	1146700	1211700	1921900	2266500	2372400	747910	755600	1729000	1566000	479050	257720	255800	1453100	578230
0.12056																							105020	56538	205210	93073	68204	102570	91298	59873	110890	71539	76864	180620	63419	73130	147580	188070	55164	96514	106820	33625	109450	84359	144720
0.12099																							106390	55723	206570	93509	68459	105400	91349	61992	111610	71750	77542	180800	62799	73097	147570	189200	55244	96802	104720	34411	109320	83881	145350
0.121	1087200	632850	1009700	2068700	833620	1518000	1654900	1148600	1213700	1923400	2272000	2371400	751860	762890	1739800	1569600	481080	259060	255840	1456000	582060
0.12125																							106300	56479	206950	92822	67808	106400	92119	61169	111750	71360	77508	181070	62404	72992	147620	190500	54563	96874	104640	34587	105680	84489	145440
0.12154	1091800	637810	1014200	2074100	837230	1527900	1658100	1152700	1219600	1929200	2276300	2366700	755840	559560	1748900	1572900	482710	258490	257920	1460900	584280
0.12169																							106900	56215	207340	91661	68489	104770	91554	61949	112320	71299	76741	180860	62358	73110	147860	191290	54685	97363	104640	34544	105350	84558	145350
0.12198																							107380	56256	208730	90379	68507	108950	91883	63169	112200	71583	77603	181390	61661	72990	148510	192730	55123	97002	104150	34297	102500	84622	145130
0.12235	1097900	641360	1018200	2078400	841790	1538700	1664900	1159100	1224200	1931000	2285000	2365900	759870	572170	1757700	1579100	484680	260050	258500	1463500	586630
0.12243																							107590	56152	208590	90913	68834	108740	92165	64315	113170	71368	77809	181730	59368	73283	148990	192700	55300	97441	103350	34183	101540	85064	146040
0.12268																							108030	56522	209950	90859	68085	110530	91924	64176	113270	71395	78449	181700	59008	74315	149950	193450	55410	97691	104300	34621	97619	85542	146440
0.12279	1106500	642410	1020500	2078900	843150	1546700	1667800	1158300	1229400	1935900	2287900	2364700	765380	584850	1771800	1582300	486620	261600	259450	1468100	583760
0.12315																							108430	56463	210070	91526	68677	110280	92604	64824	113870	72055	78615	183320	57290	73886	150000	195210	55645	97849	104470	34442	96678	85939	146600
0.12348																							109310	56226	210910	91121	69407	110170	91759	65626	113790	72071	79003	183100	56545	73907	150280	196010	55602	97849	105630	34628	93877	85738	146660
0.12358	1110000	646000	1024500	2081700	846640	1558800	1669600	1165400	1231000	1938400	2296600	2362000	768870	591170	1781200	1586000	487090	263160	261870	1469200	584400
0.12373																							109570	56833	211840	91096	69126	109220	92874	65955	114060	71498	78829	183360	55253	74390	149500	197510	55919	98390	105840	34758	89932	86230	144240
0.12408	1115600	649220	1027200	2087400	850430	1567900	1677900	1168500	1238700	1941200	2298600	2364200	772670	596690	1793400	1586200	490470	267010	263230	1472800	586400
0.1242																							110040	56514	212230	91335	69164	108270	93229	66287	114050	71932	79278	183540	52729	74489	149530	199110	55906	98002	106580	34720	89228	85746	144040
0.12447																							110440	57142	213420	91679	69457	111230	93414	66413	114960	71995	80254	182220	52576	75074	149490	200210	55325	98552	107220	34746	86431	86131	144000
0.12459	1119600	652110	1033000	2088400	853230	1576700	1679600	1173800	1241300	1946000	2301200	2360900	777190	602430	1801400	1591000	490590	265800	264250	1476600	589500
0.12489																							110520	56972	213760	91068	68446	111270	93502	66292	114680	72552	81384	180710	49786	75294	150000	200860	55635	98503	108210	34832	86277	86379	143920
0.12517																							111160	56965	214380	90850	68367	113360	94117	66679	114680	72930	81213	180410	49094	75121	151020	201710	55850	98439	108220	35025	82170	86481	143450
0.1254	1126300	654120	1034700	2090800	858560	1589300	1687300	1177500	1243200	1948600	2302800	2356700	783110	609490	1813000	1591800	493740	269670	265310	1479500	591770
0.12559																							111860	56796	215380	90785	69173	117460	94369	66841	115750	73611	82078	180130	47176	75872	150860	201370	55106	98817	108910	34863	81952	86795	142570
0.12585																							112250	57150	215280	91144	68509	116410	94390	67137	116080	73277	81839	180330	46949	76193	152590	201320	54997	98817	109230	34547	80012	86707	141950
0.12614																							112780	57342	216210	91751	67944	118150	94842	66608	116270	73525	82883	181000	45334	76574	152210	201240	55254	99164	109650	34893	78858	87008	142130
0.12624	1133200	655540	1040700	2089100	861020	1596400	1691700	1181200	1248900	1951500	2307700	2361800	788520	616010	1821900	1596300	493840	270810	266820	1481700	595590
0.12657																							113230	57463	216780	91828	67937	119060	95160	66554	117080	74000	83392	182380	44984	76906	153440	202330	55296	99812	108570	34873	78107	87139	142630
0.12667	1139200	653030	1044200	2090900	865890	1609500	1694600	1187300	1252900	1953500	2314200	2349000	792130	625840	1834000	1597700	494780	271630	268090	1485900	598620
0.12684																							113230	57630	217810	91379	68413	121930	95992	65843	116910	73607	83569	183010	44475	76729	154330	202940	55880	98788	106750	34744	76180	87672	143120
0.12712	1145700	656750	1048000	2091200	867960	1617300	1697800	1189600	1258400	1956800	2316500	2273000	797110	628610	1842000	1605100	497580	272150	269190	1491600	597920
0.12726																							114510	57575	218590	91240	68263	125030	95830	66239	117310	74143	83352	183380	44387	76427	154110	202700	55446	99816	106290	34457	75441	87763	142280
0.12759																							114150	57921	218840	91319	68957	125440	96092	65820	116860	74286	83308	184370	44425	76673	154120	203160	55807	99294	105600	35103	74405	87966	142610
0.12787	1144900	654780	1053200	2095100	870100	1631600	1702800	1194700	1262600	1959900	2324100	2267200	799790	642400	1853500	1608100	499540	274850	269900	1489100	599800
0.12806																							114340	57762	219550	90853	68965	125340	96803	65063	117890	74223	84673	184710	43439	76680	152020	203500	55643	99063	103440	34994	74485	88251	143130
0.12833	1145800	658110	1057600	2097900	874300	1638500	1705500	1197300	1266800	1962300	2326600	2261700	806360	647300	1862200	1612300	502850	276480	271050	1495700	602050
0.12834																							115300	57740	220480	91667	68643	126840	97584	65663	118440	74215	84320	184600	43022	76867	151970	203820	55966	99354	103770	34815	73502	88412	143750
0.12879																							115610	57942	220810	91835	68882	127070	97330	65896	118350	74776	84596	185000	42911	77463	151270	205220	56186	99423	97423	34938	73093	88755	143670
0.12905																							116450	57597	221440	91648	69014	130240	97869	65500	117890	74878	84762	185550	42079	77232	150190	203460	56270	100050	97445	35154	72991	88798	144850
0.12913	1155300	659810	1058500	2098600	876710	1646500	1710100	1203100	1270900	1968800	2333500	2258200	807700	655860	1873200	1614700	502890	277880	273190	1500900	607330
0.12935																							117510	58159	222340	92342	69267	130970	97652	66274	119060	74900	85865	186360	42496	77341	150510	204330	57040	99863	97799	35115	73455	89021	145450
0.12963	1155700	661430	1065500	2099700	881390	1659800	1716200	1205500	1276500	1974200	2336000	2263400	815180	666760	1879600	1624000	503100	279020	273780	1509100	606040
0.1298																							117240	57576	223140	92948	69323	130790	97935	65790	118750	75236	85918	186480	42395	77468	150800	203720	56522	99713	97490	34957	73697	89135	145970
0.13006																							117530	58137	223260	92781	69155	134550	98249	65886	118750	75036	86272	187340	42139	77688	151850	203940	56614	99544	97573	35204	74203	89167	146400
0.13039	1162400	657620	1067900	2102200	883990	1667600	1721100	1211800	1277800	1978900	2340300	2264200	818860	677450	1891700	1626500	505830	281220	275800	1514600	609520
0.13059																							118530	58413	224110	91958	69411	134650	98265	65614	118640	75049	86196	188370	42209	77783	152710	204040	57245	98919	97477	35398	72636	89368	146610
0.13085	1167700	664640	1073600	2104300	888160	1679600	1725400	1213900	1280500	1980600	2344100	2265800	824970	685200	1897000	1632000	508030	282360	276640	1518000	611130
0.13089																							119140	57889	224200	92771	69594	135330	98190	65869	118860	75481	87169	188750	43136	77848	153360	204480	57054	99803	97703	35513	72408	89510	146420
0.13132	1172900	665760	1075400	2106500	891350	1686200	1729400	1217400	1288700	1982200	2344700	2269000	827620	691380	1905800	1634100	508540	283240	277860	1524600	612270
0.13132																							119310	57806	224360	92391	69672	135260	98933	66300	119260	75108	87638	189920	43868	77925	153090	203380	56728	99883	98058	35244	72330	89779	146200
0.13162																							119550	58052	224450	91377	69783	134690	98467	67004	119170	75932	87751	189670	45697	78410	153100	202240	56665	99952	98765	35488	71673	90192	146030
0.13209																							119320	58188	224950	91601	69701	135050	98907	66712	118510	76347	88796	189480	45944	78388	152850	201910	56924	100310	98680	35584	71513	90370	144590
0.13213	1182300	660450	1078300	2105800	894670	1698400	1733000	1222400	1291100	1982400	2351400	2274100	833890	703210	1916900	1633900	509570	284610	278570	1531300	614770
0.13237																							120640	58708	225750	91822	69595	135550	99193	66964	118470	76392	89640	189230	45141	78889	153130	201460	57272	100550	97189	35864	71702	90635	142620
0.13261	1180500	662630	1084000	2110000	899020	1706900	1740400	1225700	1296600	1984600	2355800	2276400	838020	709830	1924600	1636100	511590	284950	280490	1535500	618430
0.13283																							121320	59007	225820	90493	69649	136120	99302	67421	119060	76011	89535	189290	46084	79042	153070	200710	57431	101190	94402	35380	71227	90799	141800
0.13313																							122080	58787	226500	89844	70188	137430	99580	67723	119070	76267	90118	189880	47934	79660	153570	201480	57273	101040	94111	35920	70765	90808	142040
0.13338	1179800	665470	1087100	2114200	899800	1719700	1740900	1230800	1298200	1980900	2362300	2279400	842500	722380	1936100	1639900	513210	288440	281450	1536500	621730
0.1334																							122980	58850	227380	89437	70116	136640	99617	67797	119320	76621	89669	189630	47753	80113	154790	201320	57282	99952	94027	35727	70597	90855	141840
0.13384	1176600	665960	1092900	2113100	905700	1726700	1724400	1233600	1304800	1979600	2366600	2277400	847790	730430	1942500	1642600	515680	289640	282280	1539200	618870
0.13387																							123510	59002	227740	89030	70290	137470	99483	68288	119940	76727	90798	189590	48030	80516	154820	201460	57015	100080	94672	35513	71153	91534	142210
0.13418																							124070	58861	228370	90068	70450	137120	99961	68527	119850	76920	91072	190180	50701	81390	155690	200990	57445	99858	94715	36125	71602	91708	142750
0.13462	1133800	670900	1096900	2117500	907980	1735900	1726600	1238800	1308100	1982100	2374300	2275500	849730	743090	1950200	1643800	518840	292040	284810	1529500	620710
0.13466																							124730	59083	229240	90262	70156	137800	100220	68645	119670	77136	91750	188740	52214	81829	155020	200660	56783	99673	95362	36109	71561	91579	142580
0.13493																							125130	58801	229730	90206	70206	140580	100590	69369	120760	77232	91213	188850	54170	81510	155640	200280	57447	99979	93571	36192	71693	91545	142470
0.13512	832330	673930	1102200	2121200	909900	1746600	1733200	1241300	1311400	1982500	2378800	2274500	856760	750590	1956900	1646600	518880	291100	285470	1530100	621510
0.13538																							126360	59273	230830	90907	70431	141640	100510	69456	120180	77272	91382	189620	54928	81792	155330	199680	57389	100390	93091	36055	72320	91499	143450
0.13569																							126600	59374	231440	90913	70782	141320	100740	69516	120190	77336	91999	190050	57975	81924	155280	199100	57316	100330	93166	36384	72940	91715	142270
0.13593	837560	673360	1105900	2128100	915320	1753700	1734500	1246000	1314400	1979600	2384400	2278600	859780	761500	1966000	1647300	520920	293960	287240	1533600	624890
0.13597																							127340	59094	231410	92281	70897	143220	100680	69922	120700	77732	92059	190790	58896	82216	156020	199060	57362	100690	94129	36053	73750	91999	142720
0.13636	842320	676180	1108200	2132200	918030	1765300	1734700	1252300	1319900	1983900	2389700	2272500	865360	768490	1973600	1647400	522250	294360	287860	1536100	626320
0.13642																							127670	59783	232780	92238	70452	144220	100900	70198	121110	78186	92417	189320	59726	82423	156550	197470	57376	100820	93487	36025	73813	92752	142430
0.1367																							129070	59659	232900	93164	70895	143250	100860	70642	121670	77942	92748	189300	61313	83013	156010	196990	57713	100740	93376	36021	73850	92504	142330
0.13686	842680	679100	1114400	2134100	922370	1772700	1738400	1254000	1325600	1986800	2391000	2267400	871850	778450	1983500	1649200	524780	296520	289530	1538600	628730
0.13717																							129320	59557	233400	93353	70655	142880	101370	71695	121980	78436	92697	189540	62352	82670	153760	196440	57670	101070	94209	36335	74347	92706	141540
0.13745																							129790	59692	233870	94037	70900	144210	101290	71599	121830	78342	92718	189990	62897	82727	154400	195500	57667	101200	94231	37065	74476	92675	142000
0.1376	844450	680390	1117900	2137400	923680	1781900	1739100	1259700	1328500	1986300	2393700	2266400	875970	785020	1990800	1654000	526470	298680	290960	1538100	629490
0.13794																							130630	59748	234250	94649	70931	143110	101250	71878	122450	78519	94074	190230	64036	83290	154770	195660	57785	101700	94954	36409	74831	93365	142010
0.13807	847560	681950	1123400	2138200	925040	1785900	1745300	1264000	1332700	1988700	2395900	2265800	880160	795630	1999400	1659000	526640	301440	292830	1532000	629750
0.13825																							130730	59985	235000	94320	71131	143240	101650	72019	122550	78467	94000	189450	64535	82928	154150	195880	58558	101620	95294	36826	74635	93591	140930
0.13872																							132120	60030	235020	95081	71740	144250	101860	72094	122820	78701	95167	188900	65720	83362	155130	195190	58540	102130	95832	36615	75038	93705	141060
0.13898	850430	688000	1125500	2143600	932190	1797000	1748900	1269200	1338600	1994800	2402500	2269500	885690	805210	2004700	1662300	530300	301470	293530	1532700	631540
0.13902																							132030	59948	235420	94530	71698	145450	101840	71694	122960	79023	95181	188980	66164	83362	155380	193650	58532	102370	94864	36545	75280	93302	141130
0.13931																							132930	60141	236660	95078	71758	145260	102360	72031	122980	79295	95745	188830	66033	84604	153980	193970	58384	102320	95160	36487	75085	93850	140520
0.13946	850460	693080	1127200	2143800	933890	1807000	1753100	1272900	1342200	1998700	2404500	2272600	888380	814770	2016100	1667700	530850	304720	295190	1524400	634640
0.13975																							133560	60056	237350	95219	72265	148380	102020	72535	123180	79487	96062	188250	66290	85479	154550	193670	58445	102330	95184	36998	75473	93801	139510
0.14005																							134400	60525	237250	93110	72129	146630	102510	72389	122860	79392	96748	188500	67030	86796	155170	193900	58362	102620	95299	36911	75440	94134	140090
0.14028	857370	691020	1132800	2148900	938600	1812900	1758400	1275400	1346300	2005500	2410700	2277400	896040	824110	2021000	1672300	531880	304920	296590	1488300	634500
0.14055																							135010	60590	237310	93416	72161	147890	102910	71968	122820	79875	96389	189390	67417	86726	154580	192950	58017	103060	95735	36561	76279	94302	139770
0.14079	862080	690940	1135600	2149900	941210	1823800	1761400	1280800	1349700	2006900	2415700	2277900	899890	839620	2032300	1673500	535010	306740	297040	1488200	635660
0.14087																							134890	60240	238180	93544	72617	145790	102770	72906	123240	79712	97249	189620	67924	87524	154840	193360	58294	102910	96056	36637	76050	94651	140490
0.14131	861390	697650	1143100	2149400	946590	1830200	1767600	1284900	1357300	2012800	2419100	2280200	906430	846400	2036700	1679200	535810	307310	297780	1489800	639780
0.14131																							135290	60557	238780	93624	72462	146270	103550	72412	123150	80181	96862	189850	68281	87911	155710	193290	58710	103100	96746	36969	76452	95061	139850
0.1416																							136310	60576	239500	93330	72438	148630	103860	72598	123880	79977	97247	189450	68528	89034	154780	193950	58792	103500	97123	37136	76497	95097	140440
0.14189																							136730	60604	240260	93040	72833	149440	103990	72664	123690	80011	98104	190250	68679	89723	154660	193120	58331	103720	97619	37432	76578	95529	137920
0.14208	856750	700930	1143600	2151500	948290	1837300	1771300	1290300	1357900	2014000	2421600	2279200	910460	853080	2041900	1680800	538370	309280	298650	1495400	641430
0.14235																							137410	61032	240820	93168	72700	149790	104200	72833	124490	80712	97204	190540	69123	90830	155140	192960	58941	103960	96776	36652	76561	95705	137650
0.14258	857010	703180	1150000	2155800	950570	1847300	1775000	1292100	1363700	2014800	2426000	2280800	917060	865070	2050400	1683300	538420	310450	301590	1497400	642690
0.14267																							137790	61202	241500	93384	73039	150110	104590	72247	124050	80666	97944	190760	69407	91889	155430	193870	58915	103610	96516	37387	76714	95755	137880
0.14316																							138270	61712	241770	93261	72981	151350	104300	72780	124600	80935	98439	191630	69343	93039	153680	193620	59315	104220	94629	37227	76482	95575	137690
0.14334	863070	702270	1153900	2159000	955490	1854500	1774800	1298900	1368800	2022600	2429400	2283500	921820	869720	2055000	1686400	539680	313040	303160	1499600	644650
0.14346																							138940	61342	242060	93823	73134	152890	104430	73102	124390	80981	98187	192000	69458	93439	153670	193630	60028	103820	95402	37051	76739	96114	136920
0.14384	860810	705080	1157000	2162300	956720	1865000	1775100	1303000	1373200	2020500	2429200	2287100	924050	876600	2061900	1688900	542000	314330	304690	1499600	644450
0.14396																							138960	61506	242480	94087	73248	150040	104980	73023	124720	81245	98581	193000	69519	95298	154070	193270	59872	104810	95347	37022	76379	95896	137120
0.14434																							139590	61810	242810	94729	73180	150340	104880	73169	125390	81156	98031	193120	69195	95407	153590	193930	60463	104640	95530	37356	76651	96173	137710
0.14469	859940	706100	1162600	2165200	962470	1871900	1778100	1305900	1379000	2028200	2434900	2293400	930530	883290	2066500	1691200	542900	316370	304630	1501200	645830
0.14481																							140460	61752	244140	94542	73122	150850	104990	73505	125280	81341	98305	193710	69547	96797	153900	194560	60346	104630	94326	37153	76213	96120	137040
0.14512																							140790	61323	244840	95773	73489	153300	105550	73006	125580	81959	97556	194670	68570	98168	154460	195200	60309	104980	94811	37088	76296	96586	136670
0.14518	866790	708100	1163200	2164500	964090	1879100	1780800	1311200	1383400	2032300	2436100	2296400	936440	890400	2074500	1693000	545470	317060	306890	1504500	647980
0.14542																							141340	61517	244920	96345	73045	154260	105380	73491	125890	82028	98501	195010	68534	99631	154200	196020	59905	105020	92810	37018	76245	96771	137440
0.14592																							141850	61746	244950	95439	73148	154220	106020	73568	125860	81983	98976	196360	68249	99654	155490	196730	59534	105190	92329	37228	76111	97229	138290
0.14603	866710	707150	1169300	2165600	967680	1888300	1784500	1316700	1385800	2032800	2440500	2298500	942420	700700	2081100	1650200	546840	319740	307010	1511900	648300
0.14626																							141620	61657	244640	95548	73589	155630	105940	73399	125730	82064	99148	196770	67077	99920	155690	197230	59891	105500	92868	37007	75626	97101	138910
0.14653	864340	710600	1171000	2170300	968700	1895400	1785400	1320700	1392000	2034200	2442900	2292200	947090	718870	2090900	1651500	548650	322340	310440	1515600	649310
0.14672																							142910	62324	245210	95004	73371	155870	105810	73611	126110	82066	98957	196910	67408	100270	156630	197070	60238	105830	92225	37368	75753	97712	139440
0.14697	869920	711930	1174500	2173400	973740	1905300	1788600	1325900	1396700	2041300	2446800	2292800	954870	727810	2095300	1658900	550600	321750	311070	1514100	652490
0.14703																							143210	61498	245970	94821	73390	155430	106090	73960	126910	82211	99408	197290	67649	100970	156600	197440	59943	105710	92800	37592	75579	97948	140060
0.1476																							144130	61765	244830	94059	73726	156430	106720	74761	126560	82258	99548	197610	67356	102200	156420	195910	60099	105910	93143	37942	75349	98359	140540
0.14778	873090	714040	1181600	2177800	976710	1909800	1790700	1328800	1401200	2044400	2451100	2295000	956650	739500	2104800	1661600	552390	323870	311760	1512900	655930
0.14795																							144090	62075	244790	94425	73897	157070	106690	75026	126620	82351	99739	198100	67078	102810	156970	196070	60424	106190	92196	37531	74539	98255	141130
0.14838	877180	713690	1182400	2180600	978560	1922900	1793500	1332700	1406600	2048000	2454000	2300200	965810	742820	2108800	1669900	553290	324870	314270	1516600	657850
0.14842																							144440	61373	245310	94786	74147	159160	107080	75289	126130	82718	100130	198720	66480	103370	155680	196340	60582	106210	92558	37743	74734	98661	141170
0.14869																							144830	61796	246080	94460	73592	158350	107220	75398	126210	83105	100000	199010	66848	103680	154030	196500	59872	106450	90948	37892	74107	98534	141720
0.14902																							145360	62152	246210	94495	73447	156730	107410	75249	125890	83357	99847	198890	66667	104430	153930	196910	59173	106300	91850	38190	73939	98762	141980
0.1492	880280	715260	1186800	2183200	981870	1929000	1795900	1335100	1409600	2054400	2460100	2303400	969050	750590	2115200	1675800	557390	328540	314590	1519900	661300
0.14957																							146310	61929	245230	94743	73915	158820	107990	75420	125920	83430	99742	198730	66737	104330	154770	197970	59634	106580	92008	37410	73749	98832	142540
0.14971	877950	717510	1190700	2188700	983480	1937000	1796800	1343800	1415500	2056500	2462100	2304600	975890	753300	2120900	1682800	556830	328380	317820	1522100	662510
0.14988																							146390	62113	243720	94657	74069	157960	107660	75452	126160	83608	99759	200090	66393	104540	154990	198820	60224	106820	90359	37913	73283	99328	142050
0.15033																							146970	62397	244390	94933	73679	158910	108210	76129	126560	83769	99711	200350	66633	104600	154930	199480	60169	107190	91466	37887	73824	99590	142420
0.15056	883740	722820	1192600	2190800	988490	1947100	1791700	1347400	1419800	2064000	2466600	2311700	980080	766430	2126500	1686900	558870	330550	317800	1524500	664120
0.15064																							147980	62322	244700	95358	74342	157720	108520	76226	126900	84115	99820	199450	67252	105030	155600	200360	60622	107170	91234	37814	73240	99866	142460
0.15108	888190	727000	1197000	2196200	991340	1954900	1777500	1353000	1424400	2069700	2463200	2314200	986280	772370	2130100	1694700	560110	331900	319460	1530200	662020
0.15116																							148060	62265	245530	95599	74254	157690	108760	76479	127210	84058	100170	200470	66865	105720	156120	201230	60333	107180	91725	37787	73102	100130	141110
0.15148																							148890	62522	245250	95338	74503	158330	108750	77084	128210	84197	99889	199930	67334	105700	155410	201690	60023	107300	91663	37685	73880	100130	140410
0.15192	889090	733880	1199100	2198000	994610	1964400	1747900	1357600	1429700	2072800	2468700	2317100	993070	778330	2135200	1699000	561040	334260	320210	1533200	665080
0.15197																							148830	63104	246570	95925	74239	159310	109160	77548	128390	84755	99885	201440	67043	105990	154060	203680	61130	107700	91303	37671	73403	100290	139750
0.15227																							149490	62603	246430	95095	74452	160280	109520	77696	129270	84636	99740	202060	67772	105180	150900	204100	60712	107720	91281	37930	73537	100850	139260
0.15252	886190	732900	1203800	2201700	998210	1966200	1746300	1363500	1430800	2077200	2467100	2322100	998610	786160	2139300	1698500	563220	334150	321110	1537400	666350
0.15253																							150020	62774	247610	94669	74563	161030	109430	77596	128860	85066	99380	203450	69140	105350	150490	204730	60818	107900	92272	38339	73311	100510	138420
0.15303																							150190	62850	247400	94587	74447	161430	109340	77808	129040	84893	99790	203900	69444	105010	148780	206130	60499	108680	91729	37911	73323	101000	137810
0.15306	892850	740380	1208400	2206400	1001600	1976900	1747300	1366200	1436300	2080200	2471000	2325000	1004100	793690	2143600	1703900	565170	336980	323010	1531800	669930
0.1534																							150550	62778	247990	94127	75021	163420	109540	77473	129640	85257	99982	204930	69723	105270	148180	206420	60434	108620	91995	38181	73445	101100	137820
0.15392																							151270	62780	248930	94831	75032	163400	110100	77459	128940	85605	100410	205980	69424	106170	148390	207990	61069	108790	91812	38657	73807	101430	138160
0.15393	889760	741680	1210000	2210100	1003400	1980500	1716500	1371800	1440600	2086700	2480300	2331700	1007400	802980	2149700	1702500	566870	338510	324930	1537300	670190
0.15425																							151280	62856	249310	94148	74796	165200	110410	77774	129410	85589	100300	205980	69807	105030	148740	208310	60437	109410	91869	38000	73868	101140	139320
0.15445	897070	748890	1215500	2213300	1007000	1982800	1716200	1376200	1446800	2088000	2482900	2325600	1016300	812480	2153900	1707300	568620	339900	326440	1541200	674090
0.15479																							151830	62948	250610	93498	74696	166360	111100	78076	129940	85320	100410	206240	70013	102950	148810	209700	59928	109430	92572	38606	73697	101800	138880
0.15515																							152210	63239	249690	92874	75596	165990	111050	78138	130820	85258	100830	205710	69483	102400	148810	210960	60103	109780	92303	38193	73676	102350	139320
0.15528	898780	750590	1217300	2215900	1010000	1990300	1713100	1380100	1449100	2092600	2482800	2325300	1020600	826830	2163100	1710300	569360	341390	327670	1547900	681130
0.15565																							152570	63199	250590	92855	75461	167370	111110	77895	130400	85907	101430	206050	69872	102090	149190	211490	58348	109580	92811	38301	73862	102360	138820
0.15596																							153040	63371	250900	92764	75282	167650	110850	78194	130870	86180	102280	206460	69793	100350	149620	213520	58096	109810	93175	38395	73944	102470	138040
0.15597	899880	754020	1223200	2219100	1014300	1994300	1715200	1384200	1455800	2093600	2488500	2324900	1027800	834610	2166200	1713600	571740	343260	330840	1554300	683900
0.15624																							153240	63449	251510	92678	75268	166970	110850	78342	131210	86179	102690	206470	70114	97485	148880	214880	57769	110440	93548	38214	74097	102750	137110
0.15676	901820	755800	1227200	2220900	1015500	2003100	1718200	1388400	1459700	2099900	2493600	2328500	1032600	847000	2170800	1710800	573200	343490	330000	1557500	688710
0.1568																							153460	63659	252470	92544	75774	167350	111780	78109	131870	86457	102270	207290	70726	98400	148420	216380	57718	110930	93392	38249	74538	103020	137890
0.15718																							153890	63778	252700	93275	75514	168630	111520	78699	132110	86811	103160	207930	70207	97987	148940	217120	57589	111000	93343	38541	74051	103010	138550
0.1573	906590	757420	1231100	2224900	1020600	2008300	1718500	1393000	1465900	2104100	2494600	2331400	1040900	855860	2174900	1716300	573160	344900	330580	1564200	692280
0.15768																							154120	64311	253050	92651	76072	169890	112200	78498	129950	87287	103040	208650	70394	99823	149030	217940	57366	111140	93488	38710	74520	103340	136920
0.158																							154870	64333	253860	91353	76402	170290	112190	79145	128030	86860	102840	209480	70457	97511	149230	219160	57463	111360	91741	38882	74936	103480	136600
0.15817	915310	765280	1235000	2229300	1022000	2015900	1722400	1398300	1468700	2109600	2492800	2336300	1046600	866600	2184100	1717500	575960	347330	332870	1567800	698120
0.15852																							155110	64491	254340	91314	76086	171100	112090	78911	128100	87058	103000	210030	69749	95474	149830	219230	56991	111110	91683	38727	75302	103740	136600
0.15872	921130	766790	1239500	2230800	1026400	2020600	1726700	1404900	1471400	2112500	2496000	2339300	1054300	875170	2189000	1720000	577140	347930	334960	1572200	701120
0.15885																							156260	64851	255270	92290	76258	169400	112970	79512	128810	87477	102720	210530	69743	93572	150780	219470	57048	111480	92104	38848	75220	103970	136560
0.15918																							156210	64528	255830	92497	76139	168190	113120	79534	129150	87866	102990	210960	69384	93638	150920	220040	57533	111930	92511	38657	74903	104170	136580
0.15959	918560	773150	1244500	2230800	1029200	2030500	1733300	1409400	1476500	2115700	2498900	2339200	1058000	886130	2195100	1722000	580630	349810	336610	1573800	704480
0.15971																							156620	64610	256210	92051	76068	168800	113030	80077	129230	88012	103030	210250	69423	93632	150970	217030	57329	111660	93277	38873	75020	104170	135950
0.16001																							157170	64875	257450	91453	76544	170120	113530	80156	130260	87829	104010	211210	70060	89552	151460	217080	57291	112300	93481	38534	75101	104300	136930
0.16015	920270	780160	1246600	2232400	1032200	2036300	1735500	1411900	1481300	2117900	2502900	2342300	1065500	893880	2197300	1727000	582430	350760	336820	1578300	703870
0.1606																							157860	65171	257460	90600	76140	170090	113370	80132	129600	88067	104220	211340	70440	88245	151450	216650	56936	112380	93182	38539	75580	104340	137950
0.16093																							158330	65655	257810	90841	76577	170640	113600	80240	130270	88675	104790	212120	70607	86319	149980	216080	57012	112750	93368	38880	75487	104390	137270
0.16096	923610	781590	1251800	2238300	1035700	2042300	1738200	1418600	1485500	2120500	2505000	2344600	1072800	903150	2202400	1729200	583940	353500	339060	1581700	707360
0.16145																							158850	65627	258460	90585	76847	171690	113710	80625	130530	88578	105050	211760	71153	84059	149270	216750	57464	113310	93416	38904	75637	104570	138460
0.16146	927070	787420	1255600	2238500	1037700	2051400	1744900	1424200	1490100	2124300	2507500	2347700	1075400	909800	2205100	1732800	584680	354570	340190	1586900	708960
0.16175																							159360	65669	258890	90528	77342	174780	114530	80979	130510	88713	105370	211980	71241	84015	149790	216940	57443	113420	93720	39647	75781	104490	139500
0.16197	928110	792170	1258800	2147100	1042300	2055400	1749400	1427800	1495400	2130800	2509000	2343900	1085100	919360	2209000	1736700	586300	357090	341880	1591700	710020
0.16232																							160300	65446	260120	90963	76929	174900	114310	81058	130850	88879	105760	211680	71281	86263	149940	217260	56925	113490	93758	39580	76386	104860	139880
0.16266																							160460	65793	260100	91154	77332	172830	114950	81001	129270	88887	105650	207980	71689	83342	150110	217650	57275	113750	94318	39703	76635	105020	139850
0.16282	926570	801360	1264200	2149300	1045100	2064500	1756600	1431400	1497500	2134300	2510100	2346200	1090700	929080	2213400	1741700	588250	358220	343260	1596300	710020
0.16297																							161960	66137	260660	91459	77393	173900	115210	81519	129770	89498	105740	207680	71469	80690	150650	217890	57377	114070	94166	39945	76689	105110	141810
0.16342	935330	806900	1267100	2149900	1048100	2069700	1759800	1435800	1501500	2138200	2514100	2348500	1099900	938810	2215200	1746600	589540	361030	344420	1599200	712280
0.16353																							161470	66397	261830	91379	77425	173570	115170	81494	129230	89121	105750	202760	71831	80675	151070	217110	57523	114140	94705	39965	76953	105400	141480
0.16383																							161990	66409	261440	91568	78197	175360	115340	81400	130090	90105	106170	200440	72838	79317	151190	217550	58656	114340	94329	40086	77012	105430	142310
0.1643	941300	803550	1272600	2152800	1051700	2075200	1765000	1440500	1507800	2143600	2521800	2348700	1103600	942860	2218800	1751400	593500	361500	347140	1604200	710550
0.16439																							161520	67104	262430	91555	77513	175710	115640	81981	130070	89968	105890	201100	73126	76318	151590	217560	58846	114730	93689	39978	77010	105570	141950
0.16474																							161890	67051	263070	91884	77649	175440	115580	81574	130260	90397	106370	200930	72650	73078	151010	218550	58487	115490	93373	40024	77168	105320	142180
0.16485	945330	815460	1275200	2153800	1053700	2079300	1767400	1448300	1512800	2148900	2524400	2352600	1114100	950610	2221200	1754200	593930	363450	346690	1607100	709820
0.16527																							163080	67999	262960	91887	77439	175660	115840	82056	130670	90572	106200	201000	73393	71747	151380	218570	58089	115310	93863	40068	77449	105640	144200
0.16564																							163190	68549	263210	92161	77758	175330	116430	82143	130600	90622	106850	201520	73104	71854	151920	218410	58849	115730	94320	40249	77581	105680	145410
0.16574	953190	826070	1277800	2157800	1057800	2085600	1771500	1451500	1518600	2152400	2531600	2355600	1119900	965150	2225300	1760500	597240	364050	349280	1593700	710080
0.16611																							163840	68089	263800	92121	78270	175360	116870	82492	130980	90946	107130	201060	73083	70688	151870	218370	58931	115550	94616	40735	77754	106210	146100
0.16628	958500	830560	1283000	2162600	1060300	2092600	1777700	1453800	1522300	2158800	2535700	2359700	1128000	973480	2230000	1764200	598050	367640	350470	1597300	710490
0.16646																							164390	68275	263990	92515	77908	174390	116950	82839	131070	90613	107330	200060	73843	69635	152010	218480	59638	116180	94881	40236	77445	106440	149890
0.16682																							165140	68479	264660	50316	78265	173520	116920	83052	131480	91216	107720	200550	73671	68456	151470	218970	60618	116040	95311	40121	77806	106190	149370
0.16714	960600	835700	1286700	2164900	1063800	2097900	1779000	1462400	1526800	2160600	2542100	2362500	1134700	988540	2234900	1767600	600010	369340	351740	1602800	711310
0.16741																							165860	68916	264930	49891	78072	173320	117310	83061	131750	91202	107940	200640	74136	69344	152570	218910	60948	116580	95070	40574	77624	106520	153210
0.16768	966750	840340	1292100	2167000	1067400	2102400	1785800	1465900	1530100	2162600	2547100	2369300	1141900	996410	2238100	1770300	600540	371850	352600	1606600	711550
0.16772																							166110	69226	265420	48977	78700	173650	117990	83209	131580	91620	108170	201110	73573	68787	152830	218130	62094	116350	95379	40878	77897	106990	155090
0.16816	970250	843950	1296800	2170200	1070100	2105600	1788700	1473000	1533600	2168700	2550000	2371200	1148200	1007700	2244100	1773900	603230	371250	354300	1612800	714220
0.16827																							166930	68944	265400	48104	78357	174620	117920	83582	131850	91321	107900	201390	74389	68590	153460	218000	62576	117070	95943	40766	78209	107080	157400
0.1686																							167640	69905	266340	45239	78504	174710	117970	83439	132240	91747	108560	202010	74155	67268	154150	218390	63535	117200	96002	40960	78282	107540	159120
0.16898	975700	845400	1297300	2174300	1074400	2114400	1794500	1477600	1538500	2170300	2554900	2375200	1156300	1016700	2247900	1775500	604360	375020	355920	1617300	716630
0.1691																							168240	69579	266300	45150	78859	172340	118310	83574	132780	91918	109320	201850	74418	67007	154160	218010	63464	117690	96361	41070	78889	107280	159860
0.16945																							168440	69604	267250	44992	79272	170310	118790	84020	133020	92224	109260	199960	74521	65850	154000	218480	63026	117600	96342	40715	78645	107740	159350
0.16953	976370	852220	1303200	2178100	1077300	2116500	1800100	1482300	1542500	2174100	2558400	2376600	1161500	1021600	2253800	1780400	605630	376720	358130	1622700	717580
0.17002																							168320	70097	267220	45417	79736	172080	118940	84388	133750	92287	109880	201240	74706	66024	155040	218200	63086	118410	96419	41296	78666	107830	159950
0.17038																							168740	70332	268620	44822	79067	171890	119310	84809	133560	92345	109690	202000	73967	66971	155860	217850	63804	118520	96595	41174	79257	108180	162850
0.17047	984200	855160	1306000	2179900	1080500	2117800	1806700	1487800	1549100	2177600	2568700	2378100	1169500	1033500	2256200	1782500	608910	377660	359210	1626500	717940
0.17072																							169560	70411	268220	45667	79576	170700	119490	84760	132470	92644	109470	200250	74463	67650	156100	217450	65565	118640	96508	41315	79325	108310	165160
0.17101	988540	857440	1311900	2185600	1082200	2124000	1811900	1489600	1551500	2179300	2572600	2376000	1177100	1040600	2259700	1788100	608730	378500	361090	1631100	720060
0.17129																							170020	70142	268310	45298	79030	172120	119910	84860	132860	92923	109520	200500	73493	67673	155940	216800	66781	119040	96659	41537	79250	108540	165640
0.17161																							171070	70251	269280	45797	79801	171170	119770	85144	132520	93035	109860	200010	73485	68007	155280	217150	66488	119030	97094	41535	79625	108540	165160
0.17207	991750	863630	1315900	2187500	1084900	2129700	1815400	1496800	1558100	2182200	2580300	2374500	1184100	1047500	2261900	1793200	611730	382510	360500	1634600	724530
0.17215																							171420	69960	268970	44538	79812	170980	120090	84705	132770	93482	110390	199930	73939	69032	156260	217100	67223	118960	97053	41776	79409	108640	165830
0.17248																							171330	70265	269560	45505	79835	173080	120400	84880	133170	93513	110600	199260	73865	70418	156010	217920	68522	119100	97373	41740	79590	109120	164670
0.17257	1004000	865400	1317000	2189600	1088400	2136700	1823000	1499600	1561200	2186300	2584400	2376100	1193200	1062000	2263600	1795000	613730	383250	361570	1639200	726230
0.17302																							172210	70226	269710	45493	80257	172600	120610	85853	133330	93315	111650	183090	73711	73061	156400	217800	68894	119410	97927	41679	79812	109220	163160
0.17339																							172380	70337	270650	45547	80616	174410	120930	85147	133860	93574	111490	183190	74035	74199	156010	218460	70375	119350	98335	41867	79857	109420	162340
0.1734	1004300	867640	1324800	2192100	1089600	2139500	1827200	1506700	1569800	2188900	2590800	2370800	1200400	1070900	2263300	1798600	615700	384530	364310	1642400	728190
0.17398																							172950	70513	270800	45361	79720	174670	121470	86074	133930	93701	111860	183480	74082	74949	155480	219430	71266	119500	98516	42068	80080	109830	152210
0.174	1007100	872630	1326700	2193400	1096000	2139200	1833400	1509100	1573100	2194000	2596800	2375000	1208800	1084300	2264000	1801500	616710	387150	366790	1647900	727750
0.17429																							173170	70714	271220	45764	80374	172990	121250	85696	134410	93806	112120	183480	74156	75861	155070	219500	72131	120020	99107	41933	80179	109940	148790
0.17448	1014700	870110	1333900	2195400	1098800	2143600	1839200	1516300	1576700	2194600	2599900	2375100	1215500	1093100	2266600	1805300	618990	388340	368390	1652200	728050
0.17464																							173580	70494	272010	45990	80428	174200	121760	85882	134960	94507	112480	183430	74271	77563	155180	220670	73233	119830	98949	42369	80134	109850	148320
0.17522																							174470	70387	272510	45766	80809	174810	122110	86448	134970	94684	112540	183650	74716	79626	155560	222170	74840	120520	99928	41778	80780	110110	146190
0.17533	1019600	872510	1335700	2198100	1101900	2144900	1846000	1520300	1581000	2201400	2602600	2381900	1223900	1109000	2267300	1808800	620940	389920	369470	1657100	729860
0.17557																							174880	71131	272750	46095	81079	174330	122030	86522	135490	94501	111870	182970	74639	80550	155120	222530	75882	120020	99871	42752	80602	110160	144630
0.17592	1029600	871490	1342500	2199300	1104100	2146800	1848300	1524400	1584300	2204700	2601900	2384900	1230100	1118500	2267900	1812100	623430	390360	369730	1661300	731850
0.1761																							175430	70843	273520	46240	80861	174920	122480	86976	136320	94512	112060	182890	75112	82462	155280	222780	77149	120430	99746	42291	81210	110780	145030
0.17646																							175620	71353	273830	46516	81233	174280	122720	87154	136950	94509	111860	183470	75057	83886	155740	224960	78271	120160	100420	42517	81046	111050	145120
0.17685	1034600	873780	1344600	2203400	1108500	2152000	1853500	1531300	1593200	2183300	2604800	2390000	1238800	1137400	2268500	1816600	624060	394160	372690	1667900	733360
0.177																							176550	70866	274860	47042	80935	173040	122660	87187	135860	95235	111840	184240	75708	87184	155850	225990	79296	120520	100820	42467	81210	110970	145710
0.1773																							176850	71161	275020	47723	81312	172910	123370	87344	135790	95215	110280	184300	75424	87477	156830	226790	79717	120390	101060	42901	81464	111070	145430
0.17738	1043900	873470	1347200	2206400	1110400	2141800	1859600	1536600	1595000	2179900	2607400	2397700	1246300	1144500	2272200	1822400	627030	394290	374280	1670300	735630
0.17764																							177330	71596	274370	47724	81144	172120	123810	87325	136300	95721	110530	185010	75773	88531	157050	227880	80559	120340	101600	42922	81448	111580	145700
0.17815																							177790	71604	275760	48035	81553	172940	123780	87080	136690	95694	110510	184730	75696	88551	157750	228310	80912	120450	101940	42307	81563	112060	145220
0.17825	1047400	875230	1353500	2208300	1113800	2139100	1864200	1542800	1601300	2181000	2615000	2402300	1254700	1158900	2271600	1824500	629240	397730	375880	1674400	739480
0.17852																							178280	71777	276050	48324	81926	171670	124100	87817	136970	95799	111070	184010	75400	88820	158740	230030	81794	120680	102190	42439	81957	112020	145360
0.17886	1055200	871650	1356000	2208100	1114800	2137700	1871200	1546000	1604700	2184100	2619200	2408700	1261500	1169800	2274000	1828200	630000	397840	378510	1678300	743620
0.17906																							178700	71687	276020	48489	81486	173080	124100	87887	137480	96333	111350	184630	76083	89236	159180	229610	82721	120820	101990	42381	81724	112090	143500
0.17941																							179890	71731	276450	48357	81805	172480	124600	87734	137350	96417	111190	185400	75844	90330	159570	229860	83216	121120	102140	42914	81795	112430	141160
0.17971	1062100	867870	1361000	2212000	1120300	2139800	1874600	1554700	1607600	2188100	2621600	2406100	1265600	1182600	2278700	1833100	633100	401450	378430	1685200	745660
0.17997																							180230	71628	276730	48564	81890	173080	124780	88038	136850	96595	111610	185350	75681	90868	159830	231380	83354	121320	102690	42900	82146	112940	137590
0.18031	1066100	864810	1363800	2213100	1122100	2142500	1882000	1556300	1614900	2194700	2622400	2405300	1276400	1193500	2280400	1837000	635180	402020	380010	1685300	747310
0.18036																							180600	71808	277720	49163	82144	172480	124780	88411	136950	96948	112010	185890	75923	91434	160410	231710	84326	121240	102720	43445	82150	112980	137920
0.18084	1078500	860930	1368200	2212900	1127500	2129900	1885200	1563600	1618800	2198400	2627100	2409500	1285200	1205000	2280300	1838600	635930	403440	381660	1690600	747560
0.18093																							180390	71829	277930	49510	82473	172220	125230	88676	137180	97071	111980	186080	75945	91812	159780	232810	83849	121710	102800	42856	82150	112680	137240
0.18124																							181110	72310	278420	49364	81853	172560	125690	88531	137560	96786	111810	187320	76835	93728	159770	234110	83581	121460	102980	43181	82545	113300	135840
0.18162																							181570	72060	279010	50279	82335	172070	126210	89129	137500	97458	112000	187770	76288	94581	160260	235490	83950	120010	102950	43761	82752	114080	134950
0.18171	1078700	859470	1373500	2216300	1130000	2128600	1892200	1567700	1624400	2204500	2630600	2407000	1295000	1209400	2282100	1841700	639360	404520	382310	1694800	748640
0.18217																							181230	72270	277220	50059	82854	172030	125900	89087	137470	97593	112420	188920	77173	94995	160830	235760	83806	118810	103290	43644	82956	113970	134390
0.18225	1084100	858350	1377100	2211800	1134200	2128800	1895900	1570900	1629300	2208200	2630000	2407700	1301800	1208600	2284600	1847800	639360	408110	383670	1700500	739200
0.18255																							182030	72552	277160	50863	82267	171280	126380	89485	138200	97952	111830	188970	77188	94594	161100	236690	83001	118990	103210	43649	83231	114450	133400
0.18312																							182320	72958	276800	50979	83183	170670	126560	89376	138450	98061	109430	189710	77629	95067	161090	236720	83315	119210	103420	43864	83273	114270	132820
0.18315	1090300	856790	1382600	2208300	1137100	2128700	1900800	1578200	1633800	2214900	2628200	2414100	1312600	981240	2284500	1853400	642950	408680	384980	1703800	740770
0.18346																							182510	72497	276920	51114	83297	169620	126260	89848	139290	98491	109840	189430	78055	96680	161380	237560	82370	118850	103360	44065	83323	114500	132880
0.18369	1091200	855740	1384000	2205200	1139200	2129200	1907700	1582400	1638400	2218800	2630600	2417100	1319700	986410	2288300	1857300	644030	411030	388460	1709300	742130
0.184																							183460	73084	276490	51333	83202	170600	126910	89656	139800	98384	110130	189270	78338	96280	161650	238700	81908	119290	103400	44154	83809	114220	132620
0.18437																							183520	72939	276740	50782	83304	170210	126590	90220	139070	98911	110170	189450	78000	97475	162300	239800	82114	119480	103260	43860	84001	115410	132030
0.1846	1097000	850380	1389200	2204300	1144100	2129400	1909400	1588200	1642400	2223700	2629500	2422300	1330000	996220	2291700	1862500	646300	413760	390150	1714000	747970
0.18471																							183590	73103	275820	51494	83313	169670	127210	90214	139270	99197	110840	189640	78580	97621	163140	241320	81243	119390	103210	43931	83454	115710	131200
0.18517	1106800	847590	1394900	2204300	1146800	2131600	1914500	1591400	1649400	2226100	2634300	2423400	1335400	996760	2296000	1867000	647570	415130	391050	1714500	751260
0.18531																							183990	72914	274990	51349	83495	170650	127720	90288	139760	99381	111050	188750	79045	97872	163660	242160	79731	119440	103450	44319	83684	115560	131050
0.18565																							183820	73014	275300	51269	83419	171130	127860	90242	140060	99550	111300	188380	78926	97972	163980	242910	78444	119540	103420	44058	83492	115640	131270
0.18568	1111400	844180	1397600	2205500	1149900	2129100	1919500	1595700	1654200	2230800	2640100	2425800	1347900	1006900	2298200	1871000	650510	417960	393930	1719400	753910
0.1862																							183820	73218	274890	51756	83601	171410	128270	90531	140180	99603	111540	188730	79049	98125	163980	241990	77848	119700	103560	44333	83662	116190	131720
0.18654																							183690	73448	275180	50795	84124	171640	128280	90500	140860	99624	111920	188790	79347	97888	163680	242570	76296	119910	103820	45137	84370	116130	131650
0.18656	1118500	838460	1403800	2209400	1153300	2130100	1926800	1604000	1660600	2234600	2646700	2429500	1354100	1012800	2304100	1875400	651530	420370	392800	1722700	753800
0.18713	1126500	835950	1406500	2204600	1156700	2133700	1929600	1606900	1668300	2237900	2651600	2434900	1364300	1025100	2307200	1879100	654450	420470	394610	1727900	754080
0.18713																							183860	73377	275540	51317	84412	171640	128890	90998	140990	100140	112200	188940	79160	98397	163840	242700	75699	119990	104090	45906	84777	116760	131650
0.18751																							184450	72971	275920	51139	83621	171360	128660	91245	141370	99979	112410	189790	79433	97737	164490	242310	73310	119900	104390	46597	84927	116770	132530
0.18798	1134600	832400	1410700	2204100	1159100	2136800	1932900	1613500	1673700	2242500	2658400	2439000	1372500	1030700	2312700	1882300	656460	422460	394490	1730400	756680
0.18812																							184120	73673	276510	51799	83665	170990	129590	91013	141630	99979	112170	189950	79936	97918	164470	242850	71798	120270	104870	46616	84961	117110	132140
0.18847																							184790	72985	276520	52163	83729	170700	129840	91237	141430	100650	112580	190940	79682	98352	164790	243300	70429	120720	105000	46248	85600	117810	132410
0.18861	1146400	824960	1413500	2204400	1162200	2143400	1938800	1619700	1676500	2246200	2660700	2437000	1383400	1046000	2317200	1879900	658160	423810	397330	1737200	760340
0.18883																							184510	73422	276080	52908	83695	171010	129800	91526	141770	100740	112200	191270	80170	98359	165430	243660	68306	120320	105250	46760	85451	117660	133000
0.18938																							185240	73393	276600	53441	83526	170940	130500	92132	142060	101060	112580	192060	80452	98525	165960	243130	67482	120240	105490	47432	86001	117760	133180
0.18957	1149800	818730	1416200	2206400	1166500	2145700	1944300	1625200	1683600	2252900	2666700	2440100	1389600	1055200	2322400	1884800	659560	426660	399240	1740600	762910
0.18974																							185540	73202	276540	53725	83592	170240	130320	92045	140750	100820	111310	191760	80580	98821	166400	243520	65616	120840	105500	47227	85875	118250	131750
0.19014	1159900	812690	1422400	2207700	1168100	2149500	1950800	1627900	1688300	2256700	2671500	2437600	1396500	1062500	2323600	1886800	661400	427410	401260	1745500	765270
0.19033																							185180	73207	277520	53658	83708	170760	130740	92146	138400	101200	111480	191280	80586	99074	166880	243100	63992	121140	105500	47709	86013	118480	133340
0.19068																							185700	73408	278940	53196	83868	171650	130910	92423	138580	101110	111610	192160	80708	98666	167010	243970	62069	121190	105640	47901	85963	119350	131690
0.19108	1167100	809700	1425300	2199300	1173500	2155600	1956900	1634400	1693200	2261300	2679800	2429900	1407200	1069800	2329500	1891400	664430	427540	402050	1748800	766390
0.19123																							185730	73203	278450	53110	84121	172450	131250	92649	139030	101550	111890	191660	81195	99099	167770	241810	59617	121490	105630	48995	86006	119600	132090
0.1916																							185230	73579	278770	53048	83437	171300	131390	92583	139350	101750	111820	192480	81567	99274	168110	242820	58187	122190	106220	49206	85871	119500	131990
0.19166	1166900	809510	1429100	2193100	1175600	2159500	1961800	1639500	1700100	2257600	2685500	2423500	1413800	1082300	2331900	1895300	666000	430510	403210	1756000	769120
0.19193																							185240	73740	278910	53163	84128	172830	131800	92920	139790	102240	111780	192950	81952	99305	169180	243060	56421	122090	106960	49460	85735	119770	131730
0.19222	1179000	807040	1432500	2187100	1179500	2164700	1967200	1645000	1702100	2257800	2689800	2418700	1426100	1089600	2337700	1899600	667030	431100	404060	1756600	770030
0.19248																							185000	73829	279950	52961	83711	169710	132080	93033	139660	101880	111860	193020	81734	99371	169480	243880	55332	122070	107320	49416	86009	120000	133100
0.19285																							184990	73856	280300	53487	83620	169400	132200	93101	140170	102530	112810	193520	82031	99187	169940	244340	53631	122430	106520	49551	85685	120020	132610
0.1932	1184100	805540	1437100	2188500	1182100	2165400	1969000	1649300	1708800	2254500	2699000	2422400	1433600	1104000	2340700	1904000	670140	433950	406130	1761800	770870
0.19343																							185810	73949	280400	53834	84164	169880	132420	93168	140070	102290	112490	193650	82650	98874	170110	244640	51516	122680	107230	49596	85695	120320	132650
0.19378	1192600	801620	1442500	2185600	1184500	2167300	1975900	1653700	1713500	2256700	2703200	2421400	1446300	1111100	2346400	1910600	671600	436130	406130	1765100	773330
0.19382																							182940	74575	280950	54811	84234	169480	133100	93834	139040	102500	112960	194470	82464	99479	171280	244660	49206	123190	107260	49767	85549	120610	133510
0.1944																							182750	74693	281370	55337	84698	168660	133500	94295	138800	102960	113850	194970	82680	99415	171840	244430	47977	123120	107650	49452	85645	120900	133960
0.19465	1203400	807390	1445300	2186900	1188500	2172100	1978900	1659800	1720100	2262000	2713400	2420900	1452700	1119400	2348800	1912900	673570	435620	409520	1771600	776430
0.19476																							182820	75626	282270	55322	84453	168080	133390	94289	139340	103090	113760	191880	82404	99132	172220	244530	44853	123720	107480	49460	85814	121400	134090
0.1951																							183260	75586	282630	55124	84876	170170	134160	94441	139640	103560	113620	191790	82716	99440	172600	244640	43680	123990	108110	50145	85796	121400	134660
0.19523	1206000	805890	1449800	2188900	1190200	2173100	1985700	1664100	1724100	2263500	2716100	2422300	1465400	1130600	2354400	1917900	674230	437510	409060	1774600	779100
0.19565																							183360	75652	282790	55078	84718	170750	134100	94705	139790	103350	114160	192180	83425	98632	172720	245580	43015	124280	107920	49620	85818	121720	134700
0.19602																							183980	76111	283950	55121	85151	171060	134750	94362	139600	103980	114660	193440	84118	98397	172680	247340	42295	124380	108240	49847	85637	121770	134960
0.19618	1215600	805970	1453700	2193500	1196100	2175800	1990200	1673200	1730800	2261700	2722300	2425400	1473700	1140800	2357000	1922200	678070	438670	412170	1779000	777700
0.19664																							183870	76325	284320	54895	84946	172150	134770	94860	139800	103790	115000	193670	84490	98306	172290	247900	41849	124500	108420	49956	85756	122100	134850
0.19683	1224500	803470	1454300	2196400	1197900	2170900	1997500	1676600	1734600	2268700	2727400	2428500	1481700	1155200	2362400	1926000	680100	441240	414300	1782100	781760
0.197																							183730	77964	284440	55037	85118	172360	134720	95216	140520	104300	115240	194060	85102	98048	172920	248500	42426	125070	108390	49504	86134	122060	134760
0.19755																							184260	78455	284890	55182	85807	172990	135220	95472	140760	104580	115620	194320	85782	98087	173030	248870	42758	125480	108130	49812	85987	122140	133650
0.19789	1236000	803200	1461000	2198900	1200000	2173500	2002600	1681400	1739400	2273100	2732500	2433100	1493000	1164900	2367900	1930700	682090	444250	417290	1786900	783130
0.19796																							184510	78825	284630	55449	85214	173370	135550	95332	140800	104900	115680	194990	86440	98346	173020	249670	41996	125520	108340	49945	85749	122530	133700
0.19846	1238400	803320	1463400	2201600	1203900	2174100	2007100	1683600	1742900	2281400	2735200	2434200	1501700	1175700	2368100	1933100	683860	445410	419240	1790800	787210
0.19854																							185100	79257	285740	55704	85820	172240	136040	95671	141430	105030	115840	194820	86882	97331	173220	250630	42872	125800	108930	50267	85963	122940	133900
0.19895																							184610	80711	286000	55541	85858	173720	136100	95951	141860	105210	116300	195400	87747	97236	173230	250890	42352	126090	108630	50236	85871	123060	132540
0.19928																							185050	81947	286750	55648	86041	174240	136630	95956	140210	105440	116590	196020	87980	97753	173600	251130	42944	126320	108200	50353	86238	123290	133450
0.19939	1242100	804630	1469200	2201800	1206800	2177500	2009800	1689100	1750600	2285700	2740300	2441400	1514500	1182700	2370500	1939400	684730	446430	424940	1797300	788550
0.19985																							185270	82495	287470	56195	86056	174160	136710	96281	140470	105260	117240	196600	88454	97971	173510	251250	42590	127000	108620	50517	86322	123250	133590
0.2	1258500	804170	1472500	2204800	1209500	2180400	2015200	1694100	1755200	2293900	2744900	2441000	1521400	1195100	2371400	1942300	687840	449340	427550	1799500	792300
0.2002																							185600	83827	286830	55654	86159	174860	137010	96702	141150	105650	117560	195240	89774	97685	172370	251270	42918	126920	108620	50338	86594	123580	133190
0.20057	1265700	809430	1474400	2206700	1213200	2175700	2022800	1697100	1758900	2299000	2748400	2444600	1532800	1205400	2374100	1945200	688150	450620	432940	1804100	795210
0.20078																							185700	84242	286250	56312	86310	174160	137130	97165	141130	106210	117300	194920	90155	98191	171520	251740	42860	127210	109540	50374	86679	123440	133180
0.20115																							186220	85309	286220	56335	86144	173510	137220	97174	133480	105940	117740	194030	90872	98680	167910	251340	42852	127510	109410	50476	86535	124050	132800
0.20151	1274000	812230	1481700	2209600	1218400	2153100	2026600	1704900	1765400	2305200	2756600	2442100	1539800	1219800	2376200	1949200	691520	451540	433830	1807200	799160
0.20174																							186930	86341	286400	56764	86655	173580	137300	96957	133630	106230	118130	193710	91454	98888	165820	250790	43470	127760	109750	50364	86374	123880	132010
0.2021																							186740	86834	286200	56780	86860	173560	138520	97178	133720	106150	119000	194420	91981	99865	166090	251040	43220	127830	109590	50122	86249	124140	131920
0.20212	1280200	814870	1484700	2213500	1219400	2148200	2033400	1706300	1768100	2309600	2752500	2445500	1552500	1228600	2382400	1954200	693020	454250	430380	1813000	800950
0.2024																							186700	88107	286810	56787	86975	172490	138810	97047	133490	106990	118520	194130	92009	100510	165790	250380	43561	128690	109910	50134	86176	124230	132520
0.20293																							186510	87555	287140	57068	87235	172760	138870	97337	133710	106880	119140	195300	92339	100890	165500	249710	44856	128390	110570	51126	86194	124300	132620
0.20303	1287000	817270	1489100	2218100	1222100	2098700	2036500	1714600	1772300	2314800	2755100	2445200	1560600	1239100	2383800	1958200	694760	456350	430750	1815400	804170
0.20326																							185110	88137	287470	56568	87621	173790	139300	97624	133760	106990	119240	196100	93132	101450	165450	250370	45470	129290	111000	50779	86231	124550	132560
0.20353																							184820	89375	287820	56989	87407	172800	138750	97799	133980	107040	119250	196040	93457	102070	166050	250190	46732	129680	109360	51235	85766	125180	132840
0.20364	1297500	821930	1492600	2221400	1225800	2096500	2039600	1719900	1776900	2320500	2758600	2447500	1573800	1246500	2387400	1963400	696930	457790	430250	1821400	807500
0.20408																							185310	89663	287860	57647	87385	172940	139380	98202	134210	107690	119910	196590	93506	102390	165420	251290	47500	129770	109960	50654	85655	124870	133480
0.20437																							185350	90143	288020	57438	87634	173810	139760	98576	134800	107340	119660	197300	93712	102370	164950	251090	48086	129380	109970	50675	86047	125240	133370
0.20458	1304600	826020	1495600	2225200	1228400	2100100	2046000	1727200	1781000	2324000	2765700	2454400	1583600	1255900	2390300	1966600	698720	459720	431280	1823600	809430
0.20495																							185840	90799	288160	57526	87810	172100	140210	98834	134500	107870	120190	197820	93675	103000	164960	248760	50221	129300	110220	50518	86008	125510	133240
0.20526	1311800	829970	1500500	2226800	1231000	2102500	2050200	1730800	1787400	2332900	2769400	2457900	1596900	1264400	2394900	1972200	700760	460880	430580	1827300	812380
0.20526																							186300	91055	288860	57740	88229	173680	140220	98768	134740	108070	120110	198410	94149	103460	165680	247810	51011	129810	109830	50592	86234	125680	133940
0.20559																							186800	91897	289010	57875	88229	172720	140390	98843	135130	108280	120950	199340	94429	104230	165700	248460	51808	130100	110260	51185	85908	126180	134420
0.20615	1319500	835180	1501600	2228800	1234600	2104700	2055900	1735300	1791300	2336900	2777400	2463500	1605100	1271200	2398100	1974900	703370	463740	434280	1830400	812930
0.20618																							187100	91273	289490	58069	88687	173210	141010	99344	135280	108540	120670	199480	94708	104190	166250	247290	52948	130270	110270	51411	86012	125950	135010
0.20654																							187350	91873	289820	58045	88623	171990	141360	99006	135440	108500	120780	198650	94956	105000	165810	248200	55335	130170	110130	51153	86067	126450	135410
0.20678	1325000	841620	1509300	2233000	1239600	2111400	2059700	1738600	1794900	2343700	2783000	2462600	1619500	1286000	2402000	1978500	704130	464680	439710	1835200	814630
0.20712																							187650	92122	290280	57991	89002	172790	141490	99451	135950	108840	120570	198480	95485	105860	166660	248420	56067	130420	110240	51301	86041	126560	135700
0.20736	1334400	847550	1512300	2234300	1241600	2114100	2068300	1743200	1799800	2347800	2787700	2458600	1629700	1294200	2401900	1982700	707510	466880	446240	1838600	815850
0.20741																							188790	92710	290390	58071	89088	170760	141690	99680	135660	108880	121180	199030	96275	106250	166940	248610	57487	131400	110670	51532	86313	127160	137240
0.20776																							188860	93401	291000	58130	88962	170420	141600	99500	135770	108880	121460	199040	97913	107160	167120	248210	58298	131270	110890	51521	86612	127050	137720
0.20831	1341900	855250	1513000	2237800	1243600	2116900	2072600	1751100	1804800	2354200	2796500	2459800	1637800	1309100	2405900	1987000	708190	469740	448140	1841800	818850
0.20837																							188930	93372	290720	57997	89283	171300	142010	100070	136080	109260	121840	199230	98148	107310	166460	248400	59878	131320	111300	50973	86099	127560	138030
0.20869																							188930	93898	291080	58541	89340	171530	142280	100250	136210	109070	122470	199750	98666	107920	165620	248010	60782	131690	111140	51171	86414	127450	138500
0.209	1349700	870200	1517600	2236000	1249200	2117800	2076600	1755300	1809100	2359500	2800500	2463700	1651000	1315400	2406500	1989200	711620	469710	451590	1845900	816890
0.20927																							188820	94039	291070	58849	89469	172120	142410	100220	136300	109470	122330	199690	98134	108330	166030	248680	61541	131580	111660	51096	86584	127550	140300
0.20959																							188730	94159	290810	59170	89835	172850	143190	100300	136050	109990	122920	199610	98549	108460	166130	248130	62066	131960	111300	50973	87056	128230	140360
0.20991	1359600	872280	1522800	2236200	1250600	2119800	2083200	1761000	1812400	2367500	2807300	2466100	1660400	1329200	2407000	1993600	712570	473240	456070	1851800	816280
0.20993																							189170	93890	290880	59591	90168	173700	143180	100670	136590	110370	122920	200210	98711	108850	167250	246320	62986	132540	111260	51182	87451	128410	139900
0.21047																							189580	93515	291220	58720	90206	173110	143420	100810	136920	110420	123000	201180	99040	109020	167040	245720	63311	132610	111360	51333	87527	128620	140770
0.2105	1355700	876910	1527300	2239300	1254600	2122200	2087000	1765400	1816500	2375600	2812500	2466500	1674300	1333300	2412700	1996300	715980	473860	454720	1854700	816420
0.21083																							189380	93699	291450	58699	89960	172350	143650	100990	136920	110160	123510	201800	100030	109180	167530	244740	64538	132550	111340	51448	88044	128850	141620
0.2114																							189660	93295	291630	59205	90215	174230	144040	101630	136980	110440	123980	202560	100170	108930	168280	244700	65004	133200	111830	51568	88174	128820	142070
0.21152	1367000	884460	1531500	2243400	1257900	2125500	2094100	1769300	1820600	2381800	2822900	2471000	1680900	1339300	2413300	1998800	717060	475610	455880	1860000	818230
0.21172																							189790	92438	291980	58501	90197	173820	144330	101660	137440	110900	124030	202810	100210	109050	168250	244770	66159	133360	111770	51588	89208	129160	142860
0.2121																							190050	92853	292270	58627	90721	173190	144660	101500	137400	111200	123800	203200	100620	109220	168670	245010	66248	134130	111700	52236	89664	129520	143520
0.21211	1371600	887950	1536000	2245500	1262200	2129500	2098900	1774800	1828000	2386200	2827800	2451100	1693100	1345200	2418300	2002300	720730	478670	459890	1863500	820310
0.21265																							190550	91800	292830	58746	90109	174070	144900	102160	137480	111530	124990	202210	100920	109420	169380	244480	66725	134210	110820	52047	90988	129940	144050
0.21294																							191080	91598	293130	58495	90609	174540	144880	101950	137680	111030	124690	202550	101260	109140	169760	244440	66852	134640	110060	52216	91066	129890	142770
0.21306	1381100	894650	1540600	2247000	1263500	2131800	2105600	1779000	1830000	2391600	2835800	2438700	1699800	1356600	2423200	2003900	720980	480030	462270	1869200	824170
0.21328																							190880	92316	293180	58027	90801	174040	145240	102450	137590	111360	125440	202350	101610	109070	171240	244640	67407	135060	109350	52562	91621	130450	142830
0.21367	1387300	899600	1545400	2249700	1266000	2139300	2110800	1784300	1836100	2399600	2842400	2436400	1714100	1246800	2427800	2006900	723070	482330	465930	1871000	826000
0.21384																							190750	91619	292810	57941	91103	174520	145620	102650	137670	111760	125470	203030	101460	108640	170880	245320	68011	135040	108800	53018	92723	130440	142860
0.21416																							191220	91244	292380	57403	91044	173800	145770	103130	138630	111540	125510	203650	101090	108470	172030	245400	68242	134960	109370	53369	92971	130410	142850
0.21427	1388800	910720	1550500	2251800	1270300	2138900	2116100	1788600	1840500	2405400	2845300	2440900	1723000	1194500	2432500	2009700	724660	483460	466790	1873400	826380
0.21468																							191300	91694	292550	57751	91244	173600	146020	103020	138550	112300	125800	202200	102340	108890	171580	245600	69145	135020	109530	53613	94484	130670	143860
0.21501																							191520	91345	292800	58400	91312	174170	146270	103610	139040	112100	126080	202190	102210	109000	172110	246220	68653	135630	109510	54028	95299	130890	139680
0.21527	1394200	910690	1554000	2253300	1273500	2143100	2121600	1793500	1843400	2414500	2853300	2442900	1735200	1177500	2437700	2013800	726850	486090	466590	1878200	827740
0.21535																							191740	90979	292680	57753	91404	174590	146290	103490	138390	112440	126190	201430	102720	108680	172920	246990	69116	136090	106820	54371	96340	131390	140370
0.21585	1399900	914770	1558700	2251400	1277200	2147500	2123400	1800300	1848600	2420800	2857100	2446500	1744500	1190000	2443300	2017900	729120	486890	466680	1883900	823910
0.21592																							191760	90650	293120	58080	91631	175270	147210	104210	138840	112540	126610	201100	103250	108280	172910	247270	69314	135860	106510	55965	97115	131270	140850
0.21618																							192190	90309	293000	57675	91710	173390	146980	104240	139650	112940	127070	201520	103240	108930	173350	243170	68989	136400	106010	55225	98047	131500	140800
0.21678	1414800	922010	1561900	2253800	1279200	2149400	2128800	1804300	1851300	2428700	2866500	2449000	1759800	1195200	2445200	2023400	729950	489110	468440	1885900	827170
0.21686																							191620	90353	293620	57370	91783	173850	147650	104200	139370	113200	126820	202230	104030	108690	173100	242340	69553	136670	105300	54656	98510	131660	141020
0.21719																							192290	89820	293390	56910	92173	172860	147690	104100	139200	113480	127050	203150	103910	108890	173240	241970	69694	136810	104100	54083	98976	132500	141600
0.21735	1421400	926760	1565700	2260300	1281200	2154100	2133100	1812400	1858200	2434800	2870500	2450000	1767800	1201000	2445800	2025500	732260	491600	471730	1892300	831680
0.21754																							192600	90385	293940	57390	92371	172310	147850	104270	139740	113200	127200	202700	104410	108660	173920	240890	70150	136880	103620	53464	100280	132900	141740
0.2181																							192920	90318	294750	57205	91959	173290	148520	104760	140460	113220	127420	203540	105250	108740	173750	236790	69937	137220	103520	52721	100610	132810	140290
0.21838																							193600	89296	294900	56963	92598	171360	148640	104910	139590	113870	127750	203980	105540	109050	174360	235810	69837	137630	104100	53908	101210	132780	139370
0.21839	1427600	936820	1570800	2262200	1287600	2157000	2136800	1816600	1860200	2443800	2878100	2445600	1778200	1205400	2449200	2028800	734830	494780	473040	1897700	835620
0.21897	1436600	940110	1572800	2263900	1289400	2159800	2142100	1823000	1864800	2449100	2880300	2444400	1792900	1207600	2452800	2032100	736110	495840	472870	1901000	835060
0.21903																							192700	88169	295630	56782	92868	170600	148920	104940	139910	114100	128050	205030	106800	108930	174400	237020	69585	137790	103530	53265	101780	133600	139640
0.21936																							192130	87985	296270	57356	92579	168870	149470	105160	140080	113930	128500	206070	107750	109180	175250	234700	69315	137920	103970	54956	102590	133430	139530
0.21965																							192040	88072	295480	57129	92622	168080	149680	105120	140300	114220	128370	205760	107300	110120	175430	236170	69390	138690	104370	55673	102880	133730	138370
0.21999	1443000	941240	1576900	2265200	1292300	2161400	2147800	1827200	1868200	2454500	2883100	2438700	1802300	1210100	2454900	2038200	738480	498090	471750	1905000	837430
0.22019																							192490	87395	296060	57136	93149	166170	149960	105990	140190	114480	128770	205880	107440	110140	175750	234450	69617	138850	104840	56151	102950	134320	138530
0.22051																							193190	86719	295950	57319	92897	165780	150140	105700	140340	114700	129130	206480	107200	109470	176110	231740	69191	139380	104770	56398	103660	134020	138560
0.22061	1456200	946980	1580700	2266300	1297100	2161800	2151600	1833300	1874000	2462600	2886200	2429400	1815000	1211900	2458700	2040900	741740	499690	471440	1909200	839260
0.22092																							193300	86343	295910	57413	93145	165230	150480	105840	140730	114650	129580	206680	108710	109520	175630	231860	69393	139460	105160	56852	103600	134380	138480
0.22118	1463000	951650	1584200	2271500	1298700	2164900	2156500	1839300	1875800	2468000	2888600	2432500	1823900	1215100	2459700	2045000	742560	502430	467040	1914800	843090
0.22146																							193180	85999	296690	57396	93292	165250	150900	106260	140930	115300	130210	206590	108710	109750	176120	230930	69719	139860	105240	57545	104450	134850	138580
0.22177																							194380	84401	296770	57422	93800	166140	150980	105930	141200	115400	130210	206220	109010	110830	176300	231050	69656	140270	105240	58639	104370	135050	138410
0.2221	1471600	954720	1591000	2273400	1302700	2165700	2161900	1842400	1882500	2477300	2893900	2435300	1835900	1219400	2464400	2047300	746200	503980	463370	1917100	845860
0.22234																							194180	84305	297280	57283	93617	166150	151170	106560	141260	115460	130630	207060	108610	113260	176020	228270	69418	140710	106220	58597	104800	135540	137750
0.22266																							194550	84970	298300	57211	93759	165030	151780	106910	141140	115930	130900	207400	108580	113870	176430	225200	69857	141410	106360	60422	104980	135350	137600
0.22272	1483400	955460	1592600	2276800	1306200	2168700	2165700	1848200	1887100	2483500	2896700	2438500	1845100	1229100	2470100	2048900	746920	505120	459990	1905900	846860
0.223																							194140	84805	298170	57817	93856	164120	151520	106910	141950	115440	131570	207680	108970	114580	176260	224990	70269	141520	106380	60962	104640	135410	137240
0.22354																							194360	84064	299170	57080	94579	162890	151590	106970	141930	116160	131390	207650	109380	114320	177410	224090	70432	142000	106590	60343	104610	135620	137300
0.22363	1488300	960740	1600200	2279300	1311100	2170400	2172000	1853800	1891200	2492100	2903100	2440800	1859600	1233600	2474400	2053200	749350	505290	458440	1908100	848420
0.22392																							194610	82791	299460	57597	94459	160080	152580	107450	142110	116410	131700	208240	109430	114960	177680	224640	69528	141940	106950	61074	104530	135960	137620
0.22422																							195160	81808	299780	58419	94472	159630	152530	107320	142500	116310	131870	209350	109300	116690	178350	224520	69360	142280	107000	60564	104390	136130	137180
0.22432	1504100	962130	1604400	2280600	1311500	2172600	2175600	1860700	1898400	2494200	2909400	2444800	1867900	1241800	2478100	2056400	751380	508680	459210	1913500	849400
0.22476																							194950	82744	300860	58757	94694	159170	152960	107630	142750	116300	132090	209600	109950	116300	179020	223990	69560	142560	107410	59686	104210	136240	137350
0.22509																							195960	81719	300940	58748	94998	158100	153470	107860	142850	116640	132250	210090	110890	117600	179000	223140	69501	143010	107500	59484	103930	136240	137340
0.2253	1512000	964870	1607800	2285000	1317000	2174700	2177400	1864500	1901900	2497600	2916200	2448100	1882400	1247300	2479800	2062200	754100	510610	459460	1915700	849450
0.2257																							195850	82258	301300	59097	94921	158850	153230	107930	143340	116810	131660	210850	111240	119560	178870	222670	70005	143370	106480	59741	104030	136600	137870
0.2259	1516300	965330	1615400	2286800	1318400	2175800	2179200	1871800	1909700	2505400	2918700	2451600	1891200	1254900	2482200	2066600	756720	511710	461350	1918200	852010
0.22597																							196250	82108	301870	59006	94952	158690	153850	107760	143560	117340	132060	210460	111270	120290	179540	222300	69738	143500	106230	59183	103850	136660	137370
0.22633																							196710	81818	301860	58764	95572	157200	154180	108210	143340	117110	132660	211310	111250	121010	180140	221780	69840	143780	106200	61013	103600	137190	137590
0.2265	1529500	967820	1619500	2292000	1321400	2177000	2136200	1874600	1912000	2508700	2923700	2456800	1908700	1262800	2485100	2070100	757690	515370	462330	1921700	850860
0.22693																							196990	81608	301680	58642	95806	156030	154190	108570	143830	117640	132830	211210	110980	121900	180400	221380	69718	144230	106270	60934	103570	137300	137590
0.22725																							197860	82038	301940	58272	95372	156160	154850	108510	143700	117920	133380	211970	110540	121820	181000	220210	69693	144680	106700	60895	103500	137980	137860
0.22747	1529400	971030	1624300	2293600	1325100	2180000	2138600	1880300	1917500	2515800	2931200	2459500	1918700	1271100	2488400	2073500	759860	516140	464360	1926400	853980
0.2276																							198200	81621	302540	58682	95423	155270	154710	108460	144260	118040	133000	211570	110560	122280	181660	219340	70049	145600	106940	62199	102910	138060	137210
0.22812	1538500	970780	1629400	2294300	1328400	2183000	2140000	1885400	1922300	2509800	2935000	2461300	1933900	1278700	2491100	2079300	763200	516590	464460	1929600	854320
0.22819																							198300	81734	301860	59088	95706	153980	155410	108790	144140	118340	132580	211810	109930	122130	181010	218980	70227	145520	106950	62456	102950	137910	137380
0.22852																							198950	82120	302570	58995	96148	152040	155510	108920	144580	118490	132020	212580	110610	123140	180740	215340	70883	145840	105960	62839	103120	138540	137960
0.22906																							199120	82258	302580	59349	96526	149970	155950	109080	144910	118690	132100	213430	109760	123000	181000	213030	71229	146410	106510	62927	103010	138740	138640
0.22917	1541700	970800	1630700	2299200	1331600	2180400	2141900	1890400	1925800	2515100	2943300	2464000	1944800	1287600	2492800	2081700	764530	519040	465820	1933700	856270
0.22939																							199250	82057	302750	59458	96300	147630	156240	109470	145400	118880	132080	213630	110520	123000	180450	213200	71116	146970	106780	64096	103110	138790	133960
0.22975																							199460	81203	303620	59818	96681	143660	156480	109250	145050	119110	132230	213060	110630	122410	180540	213650	70880	147180	107240	64460	102510	139480	133410
0.2298	1523300	973680	1637100	2301100	1334500	2183700	2139500	1896400	1932900	2520200	2946500	2468800	1960200	1293000	2495200	2086600	767240	520540	467410	1936500	857810
0.23032																							199720	80566	304070	59569	96667	142880	156760	109220	145300	119210	132440	213200	110980	123130	181190	213340	71717	147330	107190	64820	102550	139760	133370
0.23063																							200380	81009	304820	60605	97082	140480	157140	109750	145000	119190	132660	212280	111230	121850	181840	213680	71514	147430	107320	65104	101950	139540	133580
0.23073	1415800	974260	1638700	2306900	1337800	2184100	2142100	1901800	1936100	2529400	2955000	2470600	1970100	1303000	2499400	2089900	768480	523370	467730	1942000	860020
0.23121																							200380	79933	305330	60414	96910	140030	157740	109750	144980	119640	133030	211690	111380	121360	181800	212430	71700	147820	107510	65672	102010	139600	133680
0.23141	1424600	976300	1643100	2308200	1340000	2185100	2147800	1908900	1942000	2531900	2960300	2472200	1979200	1311700	2502400	2095800	768930	525580	468130	1944000	863660
0.23165																							200810	79956	305180	60300	97242	137770	157750	110200	144800	119720	133190	212030	111870	121220	182190	210520	71715	147840	107840	65439	101740	140080	133990
0.23198																							200970	78843	305910	61276	97673	135950	158000	110160	145390	119790	133630	213430	111420	120280	182700	209770	71795	148510	108050	66031	101670	140600	133950
0.23258	1431600	974890	1646300	2313800	1342300	2187500	2151100	1913500	1946900	2525600	2970400	2475900	1992100	1316700	2502200	2098500	772140	528160	471190	1949000	865760
0.2326																							201570	78867	306130	61824	97459	137180	158210	110130	145680	119920	133750	213960	112060	120460	182960	208300	72716	148560	107890	65533	101540	140900	134550
0.23294																							201270	78623	306100	61739	97260	135950	158180	110450	145590	120450	134270	213940	111770	119820	183830	207780	72431	148570	108520	65719	101550	141210	134410
0.23317	1438100	978230	1648900	2316900	1345900	2189300	2159000	1918000	1952900	2527100	2976200	2482600	2000900	1327700	2503600	2103800	775010	528290	473990	1953500	869170
0.23349																							202150	77581	307140	62508	97746	134400	159040	110140	145910	120540	134700	213960	111970	118750	184040	207240	72894	149350	108900	65783	101570	141620	135580
0.23383																							202800	76919	306850	62487	97579	133140	159160	110950	146120	120810	134990	214650	112160	119290	181830	207180	73136	149350	108740	65749	101760	141920	135990
0.23418																							202820	76165	307180	62402	98198	133060	159620	110690	146090	120920	135090	214770	112300	119110	180900	207820	72967	149830	108930	65915	101770	141920	136010
0.23426	1445100	979370	1654500	2319900	1348400	2187200	2164000	1925400	1957100	2529700	2988100	2487500	2010600	1332400	2506800	2107600	776900	529530	476690	1958700	871690
0.23475																							203230	76080	307450	63515	98094	133560	159460	110910	146410	121570	135620	215100	113180	118760	180900	208160	73020	150140	108520	65756	102130	142680	136450
0.23489	1459600	982010	1657800	2324100	1352900	2187600	2169500	1929000	1960900	2517300	2991100	2489600	2019400	1339500	2508100	2112000	779470	531430	478850	1963600	872840
0.23507																							203680	75561	307470	63496	98661	134140	159760	111130	146730	121190	135690	215910	113220	119200	181000	208610	73568	150070	109100	65920	102100	142510	136760
0.23541																							204180	75375	308140	63819	98831	130550	160170	111040	146550	121870	135560	216410	113500	118360	181240	208790	73504	150270	108660	66018	102470	143080	136770
0.23587	1465100	983350	1663200	2327200	1354300	2190600	2174900	1936700	1966900	2518800	2998000	2494600	2031500	1345600	2509500	2114000	782230	532620	481930	1969000	876550
0.23599																							204570	75614	308700	64016	98282	129650	160560	111320	146500	121530	136280	216630	113920	117710	182060	209490	74209	149440	101220	65826	102570	142870	136830
0.23631																							204020	75797	308880	64109	98511	127650	160960	111530	146940	121680	135650	217680	113490	116100	181820	208460	74359	149390	100700	66038	102730	143530	137140
0.23658	1477400	983480	1664900	2331100	1357800	2189400	2180900	1939100	1971200	2525400	3001900	2499900	2039500	1356400	2513700	2119600	783350	534990	485070	1972900	878880
0.2369																							204600	75025	309390	64511	99305	127860	161270	111310	147820	122170	136060	217900	113460	115700	182600	208840	74026	150390	100670	65487	103160	143480	137820
0.23716	1488800	983180	1668100	2335100	1361100	2187300	2184500	1942300	1978400	2529500	3007000	2502900	2054000	1363300	2517600	2124000	786400	537190	488460	1977600	881440
0.23728																							204640	73866	310110	64295	99456	128700	161920	111510	147710	122500	136530	217620	114490	113910	182800	208940	74205	150060	101110	66101	103620	144030	138110
0.23763																							204880	73988	310800	65016	99778	127460	162190	111730	148040	122730	136720	218310	114660	113390	181920	209590	74430	149040	101210	66248	104100	144300	138580
0.23816																							205470	73764	310640	64810	99850	128550	162250	112000	147930	122450	137170	216780	114740	112920	181850	209620	74235	149300	101260	66072	104280	144210	138880
0.23818	1502600	988970	1673400	2335700	1363600	2186300	2188500	1951200	1984100	2536300	3015600	2495400	2063900	1367900	2520300	2128600	787220	538000	493130	1984700	881870
0.23847																							205530	74406	311280	65458	99877	128890	162490	112040	148290	123010	138140	217420	114220	109910	182520	209570	74105	149700	101290	65983	104460	144490	139160
0.23878																							205590	74163	311190	65070	99700	129140	162800	112210	148350	122820	137820	216890	113780	109400	182170	209840	74128	150260	101820	66123	104450	144450	139660
0.23881	1510300	988320	1675600	2340200	1366300	2187900	2195500	1956300	1989500	2540600	3017800	2501200	2076900	1376700	2522400	2131400	791130	539560	496410	1988500	884980
0.23939																							206420	74623	312260	66187	100070	129220	163330	112080	148610	123520	138490	217520	114270	108370	181970	210130	74406	149980	102050	66000	104660	145020	139270
0.23971																							206860	75311	312460	66179	100190	129020	163690	112230	148480	123640	139220	217230	114310	108170	182030	210100	74481	150330	102440	66173	104440	145060	140050
0.2398	1514700	993680	1681300	2342600	1370400	2190100	2200000	1963500	1993400	2547200	3023300	2504400	2085800	1386700	2524200	2133400	792410	542280	499880	1992300	888110
0.24029																							207790	75544	313020	66417	100260	128550	163940	112420	148780	123710	139420	217730	113790	106010	182170	210040	74540	150070	102520	66196	104520	145290	140030
0.24039	1525900	995290	1684700	2348300	1373500	2189800	2206000	1967900	2002200	2552600	3027600	2510200	2095100	1390700	2527200	2139400	795230	543230	501080	1997800	890390
0.24063																							208040	75871	312890	66678	100150	128800	164080	112490	149050	124220	140130	217870	113530	106070	183060	211070	74456	150050	103000	66357	104840	145400	140530
0.24098																							208700	75726	312870	67375	100790	127780	164680	112370	148660	124500	140260	218270	113230	106280	183290	210440	74288	150910	103080	66628	105070	145790	140340
0.24139	1538000	998590	1689200	2353200	1377000	2193400	2209700	1975200	2004700	2557800	3032700	2514500	2108500	1399800	2530500	2141800	795400	545570	502230	2002900	890930
0.24159																							209150	76813	313170	68075	100660	128720	164750	112510	148950	124420	140900	219040	113520	104530	183480	210960	74849	150770	103080	66702	104670	145930	140800
0.24194																							209750	76492	313750	68329	101070	129100	165360	112630	149780	124640	140750	218910	113790	104940	184290	211510	74473	148960	102790	66342	105130	146560	141200
0.24203	1544900	1000100	1693700	2357200	1378500	2196900	2216300	1978600	2008900	2561800	3038300	2518700	2116300	1403800	2534000	2144800	798730	547910	504380	2006500	895540
0.24228																							209860	76945	314600	68542	100950	128890	165140	113070	150290	125080	140810	219230	111970	104330	184410	212150	74962	147400	103440	66302	105510	146520	141780
0.24261	1546300	1001200	1697400	2360800	1383400	2195400	2220300	1985900	2015500	2566100	3044800	2525500	2130300	1394200	2536100	2148700	800490	549560	507510	2010400	894920
0.24292																							210270	78185	314590	68219	101280	129920	166020	113210	149840	125230	141020	219700	111630	104790	185300	212570	74455	147720	103090	66034	105500	146580	141710
0.24331																							210730	78682	315220	68715	101050	129480	166070	113550	150100	125260	141510	220000	111180	105380	185690	212980	74160	147430	103200	66071	105170	147040	141510
0.24366	1514600	1010100	1702300	2363900	1385700	2198500	2224300	1990000	2020700	2572000	3052300	2529200	2137000	1347700	2540400	2153700	803210	552580	508650	2014800	898270
0.24388																							210960	78722	315930	68637	101730	130150	166170	113360	149830	125470	141790	219000	111290	105470	185810	212400	74055	148190	103720	66443	105300	147380	141450
0.24424																							211780	79418	316040	68845	101750	130830	166540	113640	150690	125700	142380	218880	110540	105370	186850	212140	74461	147990	103210	66475	105460	147660	141740
0.24427	1433500	1009800	1705100	2367500	1389900	2198800	2230000	1995300	2030100	2571100	3057600	2536500	2149500	1353800	2543900	2157100	803360	554490	511200	2017800	899470
0.24458																							212050	79301	316000	68735	101930	130530	167280	113610	150620	126000	142750	219090	109570	106140	187070	212230	74147	147540	104020	66715	105880	147570	142220
0.2452																							212400	79558	316430	68885	102430	132200	167560	113930	151340	126000	143010	219750	109190	105950	187430	212360	74483	147880	103980	66317	106290	147840	142330
0.24534	1440400	1008800	1710300	2370300	1392800	2199700	2231600	2001500	2034400	2575600	3065900	2539900	2159400	1358300	2545400	2162700	806220	555780	512070	2021900	901340
0.24556																							211800	79928	316810	68683	102100	134290	167650	114210	151300	125960	143420	219660	108540	105640	187370	213440	75422	147410	104170	65954	106060	147980	142880
0.24598	1451300	1011900	1713200	2372500	1395200	2198200	2236300	2005800	2039900	2576900	3072900	2545500	2171300	1370300	2547200	2165000	808000	557230	512490	2025800	904000
0.24611																							210610	79722	317550	69111	102750	136200	167970	114470	151350	126390	143890	220190	107380	105470	188050	214970	74992	147840	104380	66474	106430	148340	142930
0.2465																							210910	80522	316740	68742	102650	136800	168320	114670	151340	126330	143390	220460	108180	105650	188580	215410	75164	147690	104290	66352	106410	148630	143270
0.24677																							211490	80989	316110	69260	103040	141270	168940	114850	152010	126650	144110	220000	108270	106470	188410	216060	75551	148240	104520	66037	106640	148640	144200
0.24705	1457100	1011400	1715600	2373700	1397800	2202500	2239900	2012900	2045400	2581000	3081000	2549800	2181600	1376900	2549400	2169200	809180	558870	512720	2028900	902640
0.24738																							211930	81088	316340	69122	103150	142410	168800	114760	152160	126790	144700	219570	108290	106880	187870	215520	75750	148050	104790	66061	106690	148900	144200
0.2477																							211560	81050	316160	69347	102990	146170	169330	115210	152530	127230	144600	219240	107850	107470	188590	216320	75112	148360	105120	66294	107310	149370	144670
0.24771	1466300	1016800	1719100	2375400	1401200	2203300	2247200	2016600	2049000	2587500	3086000	2554300	2196000	1386700	2554600	2171500	812920	561930	514300	2032200	906200
0.24802																							211510	81418	316870	69440	103800	149130	169320	115340	152470	127330	145320	220020	106400	107650	188340	216720	76077	148390	105820	66698	107210	149380	144940
0.24862																							210940	81622	316720	69797	103920	148540	170510	115410	152770	127450	145730	219850	107910	107790	188060	217770	75891	148360	105650	67314	106990	149670	144540
0.24876	1465100	1017600	1723700	2367600	1405100	2205800	2251500	2025300	2056800	2590300	3091200	2557400	2203200	1391200	2557000	2176000	814340	563290	516050	2036200	907200
0.24894																							211010	81815	317260	70210	103590	149580	170350	115450	153230	127780	146240	217680	108210	108310	188140	218720	75997	148580	106360	67156	106870	149760	144150
0.24933	1472300	1016700	1730200	2365900	1407900	2211100	2255600	2029100	2060500	2596500	3093800	2561400	2216400	1399200	2562400	2179200	816470	564650	518550	2039100	910230
0.24955																							212020	82451	317550	69989	104020	152050	170630	115900	153370	128110	146180	217190	108170	108720	188850	218840	76066	148260	104280	67046	107010	150060	144480
0.24992																							212590	81926	317550	69788	104730	154960	171050	115930	153630	128220	146060	217420	109440	109040	189670	218990	75889	148960	104370	66974	106980	150570	145460
0.25027																							212890	81737	317720	70408	104650	163610	171010	116470	154070	128530	146500	217670	108840	109630	190070	219700	76229	149200	104660	66902	106380	150180	145320
0.25048	1483900	1022500	1733900	2364100	1411500	2212900	2262000	2032700	2067800	2598700	3100800	2570800	2223800	1409800	2562100	2185300	818760	566680	520280	2041900	912700
0.25081																							213310	82076	318170	70718	104860	165540	171510	116580	154300	128810	146830	218230	109190	109650	190480	219740	76976	149450	104560	66755	106270	150720	145720
0.25115																							213450	82614	318640	70964	104770	172350	172160	116670	154650	128570	147110	218360	109130	109870	191590	220050	76578	149290	104180	67397	106220	150980	146280
0.25116	1490200	1023700	1738000	2366700	1415900	2218800	2265800	2040000	2073500	2602700	3104400	2573900	2231800	1417000	2565400	2187900	820700	568550	521890	2044900	916200
0.25149																							212280	82867	318680	70985	104890	178540	171920	117060	154520	128960	147700	218740	109920	110620	191140	221030	77002	149050	103810	67518	106480	151680	146560
0.25172	1497100	1026200	1743100	2367400	1419100	2218800	2270400	2045100	2079500	2605700	3106300	2581100	2243500	1422800	2565900	2194800	821290	569700	523370	2048600	918800
0.25212																							211560	82919	319110	71329	105360	182200	172330	116960	155070	129190	147950	219230	109360	111430	192000	221930	77052	149170	103840	67075	106590	151160	146390
0.25251																							211450	84050	319580	71686	105710	186300	172700	117330	154640	129330	148290	218300	108740	111510	191920	222430	76310	149460	103810	66963	106040	151890	146940
0.25275	1510900	1032500	1745700	2369500	1421000	2224700	2275000	2051100	2082400	2612200	3111500	2584600	2249400	1428700	2567200	2197300	824820	570690	527070	2051100	919020
0.25305																							212050	83427	320090	71873	105430	189600	172890	117470	154700	129750	148650	219310	109200	111580	192310	223540	76536	149680	103270	67081	106220	152350	147190
0.25338																							212640	83980	320050	71926	105910	187190	173260	117480	153670	129750	149090	219150	108350	111420	192740	223630	77010	149940	103900	67251	105520	152170	147440
0.25353	1519500	1032900	1753600	2361500	1423000	2228600	2281200	2055600	2085200	2615500	3116000	2591800	2262000	1440400	2566000	2195300	827370	573190	526770	2053000	917910
0.25368																							211980	84617	320250	72285	105990	190240	173770	117470	153230	129950	149100	219600	107610	111790	192970	224100	77183	150430	103950	67081	106080	152820	147780
0.25429																							212390	84729	320140	72203	106220	190440	174070	117750	153190	129920	149510	219940	108720	112100	193350	222790	77117	149890	104390	67677	105770	153180	148550
0.2546	1526100	1034800	1756900	2362100	1426700	2231700	2284000	2059900	2093600	2621500	3123900	2571400	2272100	1449500	2567600	2197400	829520	575770	528820	2055600	921570
0.25466																							212530	85188	321030	72951	106700	191520	174650	118430	152680	130550	149380	221790	108570	113000	193610	223150	77016	150040	104210	67188	105710	153120	149200
0.2552	1531700	1035400	1760900	2363700	1429200	2237800	2290300	2068000	2098500	2627400	3129800	2575000	2283400	1459500	2570100	2201900	831330	577110	529470	2057100	923770
0.25526																							211190	85355	320590	73111	107020	195840	174700	118660	152700	130390	149770	222400	108050	113600	193730	224470	77610	150250	104230	67356	105520	153450	149070
0.25564																							212050	85452	320210	73787	107000	196700	175310	118930	152120	130710	149840	222670	108680	113570	193080	224390	77415	150740	101010	67547	105700	153620	149420
0.256																							212510	85875	321130	74029	106860	200060	175580	118770	152340	131060	150490	223700	110060	113830	193330	225580	77289	150820	90809	67582	105920	154110	149490
0.25637	1537700	1038700	1765000	2367000	1432400	2236700	2294200	2072700	2105000	2630700	3139000	2580000	2291700	1468000	2573800	2204100	833870	578330	530570	2061300	924320
0.25657																							212410	86262	321620	73839	107380	201000	175750	118980	152610	130950	150640	222370	109380	113980	193530	225460	77408	151170	90844	67524	106030	154430	149810
0.25694																							212900	86747	321680	74451	107390	203270	176310	119240	153160	131480	150510	221480	108990	114260	193670	226190	77600	150960	91141	67806	105900	154670	149710
0.25701	1549800	1045200	1767800	2368800	1435400	2241600	2299300	2079000	2109300	2637400	3143800	2584600	2306100	1481900	2574600	2207800	834300	580290	531690	2062400	926340
0.25729																							213310	87168	321970	74453	107960	206500	176510	119480	153120	131350	150900	221870	109210	114360	192800	226540	78084	150940	91433	67826	105340	154870	150180
0.25789																							214130	88063	322240	74861	107450	206690	176540	119600	153510	131550	150750	222090	108500	114300	192460	226400	77805	151320	90926	67972	105910	155250	150450
0.25797	1554800	1048200	1772500	2373000	1437400	2245100	2305800	2082600	2116300	2641500	3157200	2592100	2314900	1490200	2577800	2211800	837470	581850	534080	2065900	927150
0.25828																							213700	89170	322140	75360	108170	208000	177480	119980	153410	131800	150610	222530	107870	115280	193350	226710	78162	151220	91220	68031	105310	155840	151150
0.25863	1569300	1050600	1773800	2302800	1440900	2249900	2310100	2090700	2118100	2649600	3164200	2596000	2330000	1501800	2579100	2213600	839510	583710	535270	2068400	925480
0.25888																							214470	90145	322760	75472	107710	209930	177790	119840	153600	132190	150270	223060	107870	115400	193810	225980	77937	151060	91544	68021	105740	155650	151540
0.25924																							214420	90855	322790	75691	108080	212120	177850	120060	154460	132040	150400	222600	107010	116140	193710	224820	77981	151260	91972	68258	105720	156150	151520
0.25962																							214610	91023	322710	75939	108280	214170	178080	120720	154840	132290	150270	223400	108060	116720	194140	224650	77816	151590	92051	67924	105810	156120	151720
0.25983	1575000	1053900	1778500	2302600	1444500	2253600	2315400	2095900	2122700	2653300	3175900	2601200	2338200	1508900	2580900	2217900	841850	585720	537210	2073500	924980
0.26026																							214890	91641	322820	76042	108330	213800	178510	120750	155370	132530	150550	224090	109020	116560	194320	224650	78345	151290	92244	68249	105340	156470	152060
0.26041	1581800	1058900	1781700	2304900	1445500	2258500	2319900	2099100	2128200	2660000	3182900	2605200	2352300	1517800	2584400	2219800	842570	588040	538480	2076800	926290
0.26057																							215250	92512	322670	76696	108290	213560	179120	120860	155540	132810	150340	224750	108700	116970	194710	223610	78500	151520	92462	68098	105750	156860	152260
0.26102	1595000	1058800	1783200	2305000	1449000	2251200	2326700	2106100	2133600	2663000	3187900	2611900	2360600	1523000	2586400	2225200	844850	589340	541270	2082700	928000
0.26113																							215430	92184	322600	76250	108570	213860	179810	120990	155240	133060	150110	223820	108460	117220	195120	221340	78376	151740	92783	67913	105590	156590	151750
0.26148																							215560	92760	323100	76267	108490	213670	179740	121160	156250	133190	150290	224970	108850	117180	195130	220370	78412	152040	92737	68148	105590	157150	152220
0.2618																							215950	92806	323230	76642	109480	213760	179990	121530	156040	133680	149900	225220	109010	117300	195250	218470	78380	152400	93255	68079	105160	157650	151900
0.26201	1602400	1062100	1786700	2308500	1451500	2253300	2329200	2111900	2139300	2668600	3195900	2617000	2367200	1532000	2587400	2227200	846340	591000	540960	2085400	929770
0.26242																							217050	93273	323900	76771	109310	216540	181050	121590	156540	133640	150310	226270	110260	118110	195260	218640	78460	152370	93202	68398	104660	157910	151940
0.26263	1611300	1063300	1792400	2310600	1456600	2258500	2337000	2119100	2143200	2675000	3201800	2621100	2382200	1535600	2582700	2231900	850440	593030	543170	2082600	933140
0.26279																							217260	93099	324060	77007	109500	216500	180700	121800	156810	133950	150360	226670	109900	118100	195380	213000	78727	152950	93619	68115	104710	158030	152360
0.26315																							217660	93239	324800	77156	109960	216170	181070	122020	156840	134150	150200	227350	110290	119260	195740	212710	78653	152780	93652	68175	104270	158120	152570
0.26371																							217910	93361	325290	77260	109860	217200	181380	122600	157300	134410	150230	227260	111360	119350	196200	213140	78933	152380	93970	68323	104570	158660	152860
0.26377	1621900	1065700	1797500	2313900	1458700	2260800	2340400	2122300	2148300	2679100	3206800	2624700	2390400	1248800	2583700	2235700	851100	595230	544800	2085900	935540
0.26405																							218320	93324	324390	77471	110490	218090	181860	122230	157630	134860	150840	227760	110470	119440	196690	213080	78588	152460	93547	68181	104170	158650	153000
0.2644																							217330	93289	324190	77882	110670	217230	182160	122660	157630	135000	150620	229460	110040	119590	197300	212800	78552	152270	93352	68527	104150	159120	153380
0.26446	1629700	1067400	1800500	2318300	1462900	2265300	2343300	2129700	2152800	2685100	3208400	2632800	2403100	1256100	2581000	2239800	852620	596070	546070	2093300	937320
0.265																							217970	93328	324130	77827	110920	217700	182270	122940	158440	135240	149360	229540	109760	120150	197320	213090	78667	152520	93243	68779	104100	159010	153020
0.26533																							218040	93807	324400	78342	111030	216840	182870	123240	158340	135270	149300	230250	110010	121210	197630	212950	79027	152290	93729	68650	104410	159700	153170
0.26546	1639800	1070100	1805200	2322400	1465300	2268600	2350900	2135200	2158800	2690000	3207600	2636200	2410800	1263900	2582800	2242500	854450	597810	548290	2096900	938180
0.266																							218870	93595	325310	78207	111220	215580	182880	123510	158660	135690	149390	231130	109830	121270	197720	213100	78501	152810	93697	68621	104360	159870	153480
0.26618	1643500	1073900	1807800	2324400	1470500	2272800	2354300	2137900	2161800	2695700	3212000	2642300	2424400	1265800	2585100	2247900	856500	599420	548550	2103500	939760
0.26636																							219260	93652	325710	78457	111570	215220	183410	123530	158770	135840	150050	230960	110890	120950	198160	213690	78719	152940	93819	68647	104090	160060	153580
0.2667																							219170	94077	325370	79092	111610	214000	183860	123720	159480	136280	150450	232480	111050	121610	198390	213730	79151	153030	94026	69129	104160	160230	153600
0.26726	1658600	1076500	1812200	2326600	1471500	2275700	2358700	2145700	2166200	2700300	3216600	2647400	2431700	1270700	2590200	2250400	859270	600910	549880	2107600	943930
0.26727																							219890	94381	325450	78674	111570	216070	184040	123710	159510	136170	151210	233960	112290	121730	198440	213090	79466	153350	94112	68919	104040	160550	153360
0.26764																							219790	94673	325390	78689	112320	215580	184500	124270	159490	136380	151570	234880	111250	122130	198750	212940	79459	153610	94223	69083	104240	160650	153740
0.2679	1667900	1077800	1817200	2330000	1474800	2280700	2362300	2149300	2173000	2705800	3221600	2653200	2443400	1279200	2596500	2255600	860970	602390	551140	2110900	946160
0.26801																							220820	94776	326150	78341	112310	213140	184990	124360	159860	136360	152590	235190	112120	122510	199690	212540	79626	154030	94680	68816	104320	160750	154170
0.26856																							221000	94807	326480	78774	112390	212490	185420	124870	160220	137190	152570	234810	111160	122370	196540	209200	80053	154170	94342	69107	105060	161300	154700
0.26858	1675400	1081000	1820600	2333800	1477400	2281400	2366700	2157200	2177300	2710300	3225000	2661000	2451000	1281900	2603700	2257600	863070	604750	553530	2114700	946670
0.26887																							221470	94600	327420	79069	112670	212300	185870	124600	160200	137160	153190	234750	110910	123200	196160	209350	80146	154480	94430	68751	105630	161410	154650
0.26946																							221980	95202	328780	78681	112750	210900	186130	124910	160650	137100	153440	235320	111610	123190	196760	209010	80516	155120	94774	69165	106300	161880	154790
0.26961	1688000	1081800	1824300	2337500	1479000	2257200	2371000	2162800	2182700	2712700	3232100	2664700	2463600	1283100	2603800	2262000	865210	606670	554280	2120800	948420
0.26985																							222400	95052	328980	78972	112710	211530	186640	125480	160980	137830	153780	236380	111990	123450	197760	208790	80166	155770	94948	69110	106250	162140	154930
0.27017																							222950	95292	328960	78380	112820	208730	186820	125400	161180	138040	154070	238510	112110	124140	197830	209190	81113	156190	95101	69075	106880	162440	150850
0.27025	1697600	1086200	1829400	2339600	1483200	2261700	2373900	2168500	2189100	2720700	3234500	2672100	2470600	1287900	2605600	2264200	867750	611030	555920	2123800	949990
0.27078																							223020	95151	330010	78848	113210	205950	187170	125740	161250	138060	154780	239220	111300	123990	198200	209160	80813	156220	95388	69225	107880	162730	150510
0.27119																							223630	95123	329410	78636	113730	205080	187790	125850	161470	138230	155010	239200	112180	124520	199250	208730	80641	157260	95393	69416	107990	163220	149940
0.27129	1711100	1087500	1833100	2344900	1484500	2266200	2381300	2173000	2194600	2723800	3240000	2676000	2476600	1295200	2611900	2270300	870340	610460	557590	2130000	954090
0.27152																							222290	94908	330320	78877	114130	202360	188270	125330	161900	138500	155840	239290	112500	124690	199280	207750	80801	157550	95520	69055	108640	163220	150720
0.27192	1719000	1087700	1837400	2346800	1487600	2273200	2385300	2177400	2198400	2732700	3244600	2678500	2488100	1298300	2614900	2271400	872460	611760	558380	2132500	955900
0.27218																							221310	94576	331450	78900	113910	201310	188870	125720	161980	138820	155980	238990	113190	125220	199870	206650	81036	158820	95620	69533	109510	163570	150650
0.27251																							222280	94799	331700	78859	114300	199760	188810	126140	162550	139110	156150	239980	113110	125270	200170	206960	80867	159570	96008	69588	110390	164010	151070
0.27296	1722900	1092200	1841100	2350800	1492200	2275300	2391500	2185900	2204800	2736400	3249300	2685400	2495100	1299500	2616200	2276100	873870	614510	560590	2137400	958570
0.27312																							221660	95209	331780	78842	114770	198360	189140	126270	162070	139320	156570	240440	112890	125150	200560	207380	80901	160600	96167	69926	110830	163680	151750
0.2735																							222030	95378	332310	78636	114670	198990	190100	126110	162440	139570	156800	240850	113090	125650	200930	207020	81204	161090	96351	70179	111820	164320	152230
0.27364	1738500	1095300	1845000	2354800	1494700	2282300	2396200	2190100	2211000	2744700	3251500	2690400	2508100	1304500	2618300	2277500	874890	615830	561170	2140000	959040
0.27383																							222140	95391	332970	78929	114800	198030	190010	126370	162320	139600	157030	241250	113590	125810	201120	207320	81169	161910	96585	70500	112370	164170	152540
0.27426	1743700	1097000	1849500	2357100	1498400	2287500	2401000	2196900	2214200	2747900	3253600	2697300	2514900	1312300	2624100	2280800	877530	618360	563020	2145100	961990
0.27442																							221410	95663	333850	78814	115290	196960	190220	126520	162500	139910	157230	241320	113750	126460	201220	207600	81442	162450	96767	70303	113610	164860	153020
0.27477																							221560	95692	333610	78783	115420	196810	190520	126520	162620	140180	157510	241260	113620	126780	201180	207820	81805	162990	96556	69251	114320	165060	153140
0.27513																							221680	95534	333600	78683	115710	196700	190990	126880	162530	140230	158210	241400	114010	126960	201350	208000	81589	163910	97396	69365	115310	165320	153320
0.27532	1758500	1101800	1852500	2361400	1501100	2289700	2405100	2201600	2220600	2759400	3250500	2702500	2526300	1318800	2627700	2285000	878540	619880	564200	2147400	963000
0.27574																							221810	95867	333540	78785	115840	197090	191980	127250	162490	140390	158510	242720	114190	126990	201580	207870	81738	164240	97737	69481	116100	165780	154090
0.27603	1763700	1100700	1855900	2365200	1504400	2297100	2409100	2208200	2223800	2761100	3253200	2709600	2532500	1323100	2630000	2287700	879870	622010	567830	2152300	964850
0.27613																							222560	95939	334480	78348	116350	197230	191710	127300	160230	140770	158500	243050	114370	127180	201540	208210	82010	164710	97590	68880	117590	165580	154260
0.27672																							222410	96318	334600	78771	116640	196400	192060	127530	160190	140760	158870	243780	114420	127550	201950	208320	82260	165640	97916	68835	119200	166220	154780
0.27702	1770000	1105900	1860700	2366400	1507100	2301500	2413000	2212700	2230600	2767500	3252600	2714400	2543100	1333300	2631100	2291900	883510	624550	567600	2154800	966690
0.2771																							222980	96386	335240	78537	116660	195140	192570	127900	160200	141240	158930	243870	115430	127940	202430	207870	81971	166340	98102	69004	119460	166240	155210
0.27748																							223310	96646	336080	78032	117080	192430	192860	128070	160320	141540	159350	243590	114780	128200	202000	208320	82222	167380	98056	69054	120950	166700	155420
0.27773	1779300	1105900	1863900	2372800	1509900	2307900	2415600	2218400	2235700	2777900	3252500	2721400	2551900	1341200	2635500	2295600	885070	626640	571260	2157900	970830
0.27804																							223300	96752	336180	78041	117170	191700	192700	128550	159270	141450	158810	243470	114660	128710	202460	208140	82309	167860	98269	68867	121790	166780	155360
0.27843																							223890	96775	336790	78113	116910	191070	193680	128490	158960	141620	159500	244070	114360	128660	202480	208350	82922	167880	97849	69323	124250	167450	156050
0.2788																							223230	96692	336910	78246	117150	190550	194150	128460	159520	141780	159640	243310	115010	129130	203170	209460	82952	168290	97760	69241	124940	167500	156310
0.27883	1783400	1109600	1865200	2374600	1514800	2310300	2424200	2225300	2241100	2781400	3255600	2724800	2562800	1343500	2638600	2300200	888030	627900	572470	2161000	972780
0.27939																							224210	97158	337740	78409	117740	191110	194260	128570	159400	142040	159630	242410	114570	129330	203400	210160	82941	168440	98107	69949	125700	167960	156300
0.2796	1792300	1112300	1868800	2378200	1515700	2318300	2428100	2229800	2245900	2784800	3258000	2729700	2570700	1351200	2648400	2302600	890180	629260	573830	2164500	974930
0.27972																							224020	97344	338200	78533	118120	192300	194800	129480	160060	142510	159840	241570	115160	129940	203100	211020	83021	168300	98062	69816	126330	168200	156980
0.28033																							223730	97236	338740	78697	118100	192370	194980	129190	160210	142670	160270	242170	115280	130390	203960	211510	83143	168820	98509	69443	126710	168580	157020
0.28058	1795400	1117200	1875100	2379900	1520100	2319500	2427700	2236000	2249900	2791100	3265900	2728300	2581700	1358700	2652100	2307800	891830	631820	574510	2168100	977060
0.28067																							224270	98058	339190	78891	118330	191300	195580	129570	160090	142710	160980	242460	113820	130580	204430	212500	82662	169160	98864	69313	127210	168700	157020
0.281																							223070	98052	339610	79196	118670	189140	195630	129520	160590	142890	160980	242730	113580	130490	204770	213020	83258	169450	99149	69221	127520	168790	157490
0.28141	1799800	1117600	1878800	2382400	1524300	2322700	2431000	2240800	2256200	2799300	3270600	2732300	2588700	1363000	2655700	2311200	894510	633460	576640	2172000	980650
0.28161																							223010	98571	339870	79039	118890	188440	196420	129780	160720	143310	161370	243430	113540	130410	204660	213450	83326	170620	99280	68899	129120	168810	157940
0.28196																							223410	98367	339850	79459	119110	187570	196490	129880	160810	143300	161680	243890	113290	130570	204500	213440	83254	170860	98882	69559	129570	169350	158560
0.28204	1813200	1119900	1880900	2385900	1525500	2325700	2433600	2244500	2259300	2803200	3272900	2737400	2595900	1364600	2660400	2316500	897010	635640	578320	2174500	982130
0.28231																							223370	98746	340400	79631	119270	187280	197220	130550	160750	143900	162680	243890	112690	130520	205310	213890	83779	170820	99336	69446	129930	169450	158840
0.28288																							223510	99049	340290	79655	119620	185480	197340	130220	161080	143900	162550	244270	112350	130770	204830	214150	84071	171200	99523	69905	131030	169820	158480
0.28311	1816100	1125300	1883300	2389400	1531400	2329000	2440900	2253400	2266400	2812100	3278900	2742500	2607500	1371100	2667900	2319200	900760	638210	579130	2178400	984280
0.28324																							224020	99126	340980	79676	119920	185210	197730	130950	161210	144120	162640	245010	111620	131110	205220	215200	84378	171610	99638	69766	131610	170330	159360
0.28363																							223800	99362	341260	79971	120220	185900	198020	130960	161920	144300	162760	246810	111680	131030	205720	215970	83876	171970	100150	70175	132570	170670	159770
0.28383	1828000	1128400	1886500	2394200	1532300	2335600	2444200	2256800	2271800	2818400	3281200	2752300	2613800	1377200	2673700	2324200	903320	638880	581260	2181500	989230
0.28427																							224010	99240	341800	79697	120220	186180	198710	131440	162090	144600	162530	248020	110180	131800	206430	215980	84112	172260	100230	70148	133400	170410	160590
0.28463																							225160	99361	341350	80585	120570	184660	198760	131470	161950	144970	163170	247350	110330	131770	206660	216020	84083	173120	100180	70047	133450	170800	160990
0.28492	1836000	1128500	1890300	2396800	1538100	2338700	2449400	2264900	2276700	2824200	3286400	2756400	2623800	1378000	2679800	2326100	905130	640410	583310	2187800	991400
0.28528																							224990	100040	341320	80160	120690	184610	198830	131530	162280	145010	163850	248060	111010	131410	207130	215320	84349	173560	100260	70169	133440	171210	161090
0.28563	1846500	1128600	1892300	2401700	1540300	2342700	2452500	2269900	2283100	2832900	3290100	2764600	2630700	1383300	2687700	2331100	907540	643500	584980	2186900	993020
0.28566																							225250	100520	341710	80942	120980	185730	199740	131950	162450	145240	163560	249250	110230	132280	207440	214810	84389	173790	100270	70488	134050	171500	161020
0.28601																							225870	100780	341870	81146	121310	186690	199760	132120	162660	145460	163720	248970	109360	132490	207520	214310	84387	174350	101010	70749	134440	171480	160870
0.28667																							225300	101040	341490	81495	121250	187520	200580	132440	162850	145990	163930	249350	108720	132640	207570	213540	85121	174180	100600	70275	134550	171810	161520
0.2867	1856500	1133200	1894900	2406100	1543900	2348500	2450300	2278100	2288900	2838800	3294600	2768900	2640000	1387200	2687000	2334300	910140	644800	587300	2191700	994380
0.28705																							225610	101230	341210	81421	122020	188560	200470	132660	163230	146170	164270	249550	108840	133070	208340	212930	84889	175030	101020	70416	135050	171740	161630
0.28741	1864400	1136100	1899000	2409200	1548300	2352900	2456500	2282300	2293100	2846300	3300000	2775700	2647400	1388000	2686900	2339500	912240	644560	587900	2193600	998080
0.28771																							226210	101170	341250	81576	121940	189040	201040	132740	163510	146200	164380	249730	107920	133030	208470	212050	85171	174710	101120	70509	135420	172240	162220
0.28807																							226430	101800	341000	81653	122440	189490	201280	132670	163550	146680	164550	250040	107140	133390	209040	211550	85167	174860	101130	69951	135390	172280	162660
0.28844																							226890	102140	340720	82714	122510	190140	201950	133210	164050	147180	165210	251060	106610	133410	209350	211140	85291	174950	101400	70497	135400	172670	162700
0.28858	1872500	1138000	1901600	2413500	1549100	2358700	2459800	2285800	2298400	2851700	3305000	2780000	2659000	1253200	2684000	2341500	914640	646390	590440	2197800	999410
0.28904																							226860	102270	340520	82835	122740	190630	201930	133450	164260	146700	165490	251110	105730	133730	210090	209720	85479	175830	101560	71282	135400	172810	163190
0.28926	1879400	1142200	1906000	2416500	1554200	2358800	2463800	2293800	2303400	2858500	3309800	2786000	2666200	1253900	2670700	2344400	916290	648880	590950	2200000	1003000
0.28942																							227100	102620	339640	82832	123070	191770	202580	133660	164060	146950	165360	251280	105430	133860	209780	209650	85675	175970	101550	71113	135040	173200	162650
0.28978																							228310	102860	340010	83235	123380	193440	203030	133900	165010	147500	165340	251610	105740	133730	209680	209460	85493	176010	101300	70858	135680	173700	162880
0.29033	1888700	1143800	1908400	2419500	1556300	2366100	2466400	2299400	2307800	2864100	3315500	2790200	2676100	1262200	2663700	2349500	919860	651060	593150	2204400	1005900
0.29039																							228380	103280	339980	83782	123460	193440	203850	134230	164800	147520	165990	251840	104660	134360	210120	209350	85550	175900	101780	70421	135220	173920	162880
0.29073																							228940	103750	339680	84397	124050	193050	203930	134050	165260	147890	166510	252680	103930	134560	210120	209940	85571	175380	102180	71218	135530	174140	163290
0.29102	1904400	1147400	1914600	2422800	1560700	2366400	2473200	2306300	2313900	2871900	3321500	2793900	2681300	1268500	2658700	2353700	919770	652860	595100	2207800	1010500
0.29135																							229130	103590	339800	84910	124370	194430	203970	134640	165320	148100	166750	252420	103820	134970	210400	210180	86052	175100	102200	71118	136090	174080	163730
0.29171																							229440	103980	339830	85043	124560	194470	204770	134410	166070	148200	167110	253870	102720	135010	209560	210160	86069	174260	102460	71023	135850	174680	163050
0.29175	1911000	1148100	1918000	2425500	1562200	2372600	2476600	2309600	2317200	2877600	3325100	2802700	2692000	1270300	2658900	2359000	922690	654820	596900	2213400	1013300
0.29207																							229840	104230	338790	85084	124510	194460	205050	135030	166180	148740	167850	253780	103050	134940	209760	205140	86469	173560	102340	70834	135680	175000	163020
0.2927																							230100	104600	338540	86007	124770	193450	205250	135120	166230	149150	167840	254970	102630	135600	210200	205540	85938	173730	102310	70634	136010	175280	163060
0.29281	1925800	1156600	1923800	2426700	1566100	2374300	2480700	2318800	2323900	2882600	3332000	2805500	2697300	1279100	2647700	2361100	924810	657190	598060	2216100	1015600
0.29303																							230390	104840	338910	85976	125550	194130	205900	135240	167220	149450	168450	256110	102520	136000	209940	205800	86573	173050	103060	70707	135210	175560	163520
0.29343																							231200	105250	338980	86463	125500	195030	205920	135510	167410	149720	168540	256360	102280	136060	209930	206210	86722	171930	103050	70127	135630	175670	162870
0.29347	1935000	1155300	1928600	2429000	1568400	2374500	2487000	2322000	2327800	2894300	3336400	2815100	2707500	1286800	2637500	2366000	926400	658320	598890	2221000	1018000
0.29404																							231560	105250	338610	86370	125780	194840	206370	135540	167350	150000	168820	257210	102100	135980	209580	205420	86154	172270	103550	70346	135450	175870	164060
0.29444																							231750	105720	337910	87061	126240	196150	206750	136140	167710	150120	169080	257520	102400	136330	209070	206470	86557	172080	103550	70591	135440	176470	163850
0.29469	1944700	1160100	1932300	2432100	1572600	2380700	2490000	2327300	2331000	2898000	3342500	2820200	2712000	1293100	2629900	2369400	929510	661120	600310	2223700	1020300
0.29502																							232320	105440	336550	87317	126260	195990	207020	135850	168000	150250	168210	255580	102830	136640	209120	207740	87281	172370	103310	70483	135010	176640	164350
0.29535	1958900	1161500	1939000	2434800	1577600	2385500	2495900	2335300	2338700	2907000	3329500	2828500	2720300	1291400	2626600	2374000	931870	661350	602740	2229600	1024500
0.29544																							232520	105810	334630	87642	126640	191610	207530	136250	168740	150470	168460	255990	102900	136700	209190	208610	87065	172370	103060	69976	134860	176820	164640
0.29576																							233360	106750	332800	87738	126710	190950	207650	136430	168780	150750	168730	256360	103270	136890	209960	209260	87093	172160	103490	70053	134820	177400	165590
0.29635																							232950	107390	284580	88128	127020	190440	208890	136430	169070	150570	169290	258260	102740	137020	210290	209640	87051	172320	103500	70199	134520	177190	165500
0.29647	1965500	1166800	1941800	2440700	1578500	2390600	2499800	2339200	2342300	2912500	3336100	2833900	2727400	1301300	2624600	2375500	933610	665030	602990	2232800	1027100
0.29677																							233240	107590	283160	88127	127460	190820	209080	136850	169060	151150	169060	258660	103210	137140	210630	210170	87594	172320	103870	70345	134550	177750	165420
0.29713																							233490	107500	282220	88962	127800	190050	209140	136770	169270	151490	170000	258680	103640	137240	210560	210180	87349	172040	103750	70131	133390	177790	165460
0.29715	1972900	1170400	1948800	2444000	1583600	2393800	2507800	2346900	2350200	2919800	3339000	2837500	2731500	1309200	2622000	2380800	935310	666560	606600	2237700	1028900
0.29779																							234250	107480	282010	89550	127850	187980	209740	136660	169680	151420	170530	258820	103300	137520	209340	211360	87585	172000	103840	69797	132520	178560	165800
0.29818	1987200	1174100	1952100	2445300	1586200	2399400	2511600	2350700	2353100	2923100	3344700	2845200	2741700	1311900	2619900	2382300	938530	669060	606270	2241800	1032200
0.29819																							234810	107920	281440	89805	128210	187630	210080	137210	170090	151470	170770	259500	103850	138090	208570	212090	87627	172110	104510	70212	131670	178650	166110
0.29881																							235120	107890	281380	90086	128750	188720	210600	137650	170520	152220	170870	259880	104100	138010	207740	212560	88007	171950	104280	70034	131490	179150	166220
0.29884	1995900	1174400	1955300	2451000	1588100	2398800	2517500	2359500	2360700	2929100	3349800	2849700	2747300	1325400	2619300	2387200	939640	670660	607190	2243800	1035600
0.2992																							235740	107980	281740	89986	128780	189910	210880	137610	170250	152260	171350	261190	104090	138150	207510	213390	88002	171860	104150	70234	131240	179110	166400
0.29956	2010700	1173200	1963500	2453400	1593500	2403900	2521100	2363700	2365400	2924800	3352000	2853800	2756900	1329600	2621100	2390300	942500	672200	608460	2247900	1037300
0.29958																							236000	108900	281830	90698	128900	189680	211430	137870	170760	152660	171450	259850	104530	138380	207500	213180	87848	171700	104580	70583	130320	179450	166570
0.30019																							236450	108760	281820	90779	129140	190440	211350	138490	170730	152620	171580	260230	104700	138630	207000	213410	88223	172130	104400	70470	129840	179660	166620
0.30059																							236240	109140	282280	91020	129470	190480	211760	138170	171630	153010	171690	260760	105790	138860	207140	213730	88421	171890	104350	70612	129810	180190	166730
0.30062	2016900	1179500	1965400	2457700	1595900	2406800	2524700	2371500	2370900	2929800	3359100	2853000	2762500	1203600	2623900	2394100	944550	673960	610070	2250300	1040900
0.30123																							236750	108990	282490	91590	129540	190030	211770	138690	171220	153290	171750	261400	106280	138860	207140	213280	88753	171890	104780	70755	129170	180380	167160
0.30134	2025300	1183800	1972800	2461500	1599000	2409400	2531100	2375800	2375900	2928300	3363900	2836600	2770900	1208500	2623900	2396900	947480	676350	611850	2253900	1044100
0.30158																							236920	109060	282630	91965	129890	189680	213080	138990	171250	153250	171800	261510	106940	139240	208170	213630	88695	171890	104990	70663	128820	180670	167400
0.30195																							237760	109380	283310	92100	130520	189450	212950	139330	171380	153700	172060	262200	107200	139530	208650	213620	88795	172160	105150	70640	128610	181240	167770
0.30243	2036100	1185100	1976500	2466000	1602700	2412400	2534900	2380300	2380200	2931200	3367600	2837800	2775700	1218100	2621500	2400200	949250	677830	613750	2258500	1046200
0.30258																							238580	109500	283840	92992	130350	190520	213610	139410	171050	154000	172540	262140	108060	139510	208720	213900	88729	171920	105200	70166	127520	181470	167910
0.30293																							238640	109380	284430	93420	131080	191060	214100	139770	171110	154130	172700	262350	108890	139980	207050	214320	88773	172480	105430	70928	127750	181440	167920
0.30313	2046200	1185500	1982200	2470600	1606700	2415500	2541300	2388800	2388300	2939800	3371800	2843300	2784000	1221600	2618200	2404000	952060	680650	614130	2264200	1047500
0.30327																							239200	109720	284990	94000	130820	190580	213870	139630	171300	154440	171880	262790	109520	139680	207190	213820	89490	172590	105270	71338	126980	181670	168290
0.30392																							239610	109800	284880	93932	131320	191790	214330	140030	171120	154680	172470	263110	109880	140230	207580	213710	89531	173030	105470	70907	126600	181950	168680
0.30423	2061600	1187800	1984700	2474400	1609100	2420300	2544800	2393000	2390000	2942600	3378900	2845100	2787900	1231700	2616800	2407400	952040	681550	615240	2268600	1052100
0.30434																							239720	109980	285240	94703	131590	192130	214780	140310	171070	154950	172270	263600	109770	140410	206900	212990	89691	171990	105890	71106	126660	182460	169300
0.30492	2069200	1191700	1988800	2479700	1613000	2423600	2551100	2400700	2398800	2950400	3383200	2848900	2795700	1237100	2618900	2411200	956250	683870	617620	2275900	1053600
0.305																							240090	110430	286290	94888	131930	191720	215240	140520	171300	155090	172410	264200	111140	140510	208040	213200	89650	171700	105940	71367	126930	183060	168750
0.30541																							240360	110670	286790	95073	131860	191830	215850	140510	171190	155100	172940	263420	112050	140940	208060	212480	89703	172190	106420	71424	127150	182870	169310
0.30559	2072900	1193600	1993600	2482400	1616400	2425100	2555500	2406600	2402000	2955200	3387000	2855300	2799600	1247600	2619600	2415500	957110	685940	619110	2278800	1053800
0.30574																							241030	110330	287660	95697	132460	193480	215940	140900	171990	155540	173150	263930	112600	141270	208810	211950	89704	172490	106310	71420	127240	183050	169750
0.30639																							239540	110470	288370	96072	132360	193050	216100	141330	171890	155170	173570	263870	112670	141470	209190	211150	89499	172810	106720	71746	127390	183570	169860
0.30673	2089000	1198300	1997400	2489500	1618500	2431000	2558600	2413700	2410200	2964000	3394100	2857800	2804500	1253300	2622600	2419400	960840	688060	621440	2280100	1056000
0.30679																							239490	110680	288940	96306	132400	192060	216930	141130	172220	155480	173850	264230	114380	141420	209350	210900	89487	172620	106670	71674	127710	183610	170180
0.30713																							239670	110470	289790	96639	133140	191580	217060	141580	172080	155600	174180	264730	115280	141830	210620	211700	89616	173110	106440	71801	127890	184420	170700
0.30747	2099000	1199300	2003700	2492700	1622400	2435500	2566300	2418700	2415000	2968000	3399300	2868000	2809100	1264900	2625400	2422000	962690	690620	622390	2282900	1057800
0.30784																							239830	110640	290430	96788	133210	191370	217410	141870	172220	156000	174520	265360	116000	142030	210850	211830	90187	173080	106520	72048	127970	184500	171190
0.30823																							239790	110470	291060	97372	133680	191240	217840	142010	172520	156620	174960	266750	116740	142150	210990	209010	90198	173970	106100	71817	128360	184810	171510
0.30859	2110700	1204400	2006100	2495700	1625800	2441000	2569900	2424000	2420900	2973300	3405300	2872600	2810700	1270100	2628000	2427400	965340	691090	624030	2286500	1060500
0.30889																							240500	110550	291890	97899	134010	191440	217930	142130	172290	156750	175560	267820	117550	142320	211490	207840	90090	174850	105730	72145	128780	185440	171800
0.3092																							240560	110430	292140	97787	134220	191360	218890	142200	172790	156890	175420	268470	118220	142840	211820	206700	90543	175510	106030	72226	128990	185640	172250
0.30936	2119200	1205000	2009800	2501300	1629100	2445100	2575500	2430300	2424800	2980200	3411200	2880300	2816900	1276900	2630600	2430300	966630	693890	626360	2286800	1065300
0.30961																							240870	110270	292770	98181	134480	192700	219370	142500	172740	156830	173880	268350	118730	143150	212300	206600	90639	176170	105920	72024	129150	185870	172270
0.3103																							241770	110510	293240	98006	134750	193020	219750	143040	172690	157220	174090	268120	119440	143360	212530	205700	90552	176610	106480	72357	129440	185810	172320
0.31051	2131700	1208900	2015100	2503900	1632200	2452300	2580900	2435200	2431600	2986400	3414600	2884500	2820500	1283700	2634700	2435100	970380	696390	628040	2291900	1066100
0.31066																							241880	111030	294210	98461	134930	192330	219940	143180	173440	157260	173590	269140	120710	142990	212660	205740	90873	176800	106530	72477	129500	186470	172210
0.31121	2141300	1210300	2018000	2509500	1637200	2456800	2585600	2442100	2435700	2995400	3418300	2891800	2826200	1291400	2636700	2437400	972050	697370	629160	2295600	1067900
0.31129																							242590	110930	294520	98672	135080	192910	220020	143560	172300	157310	173830	268490	121080	143390	212510	205340	91162	177220	106780	72471	130090	186370	172580
0.31162																							242910	111360	295270	98714	135490	192710	220650	143490	172350	157440	173740	268980	120790	143870	213120	205310	91312	178120	106610	73043	129980	186790	172590
0.31197																							243260	111430	295350	98703	135770	192170	221110	143470	172120	157880	173950	269770	120760	144260	213380	204770	91576	178760	106910	72898	130170	186980	173360
0.31233	2147600	1212300	2022600	2512300	1639000	2461700	2588000	2447500	2440600	2999900	3425100	2897700	2829700	1295000	2641100	2442800	973970	699000	630730	2298700	1069400
0.31263																							244010	111730	296020	99010	135870	192470	221310	143980	171870	158030	174230	270820	121030	144010	213570	203120	91489	179360	106890	73179	130220	187270	173970
0.313																							244500	111960	296830	98841	136360	191740	221860	143890	172250	158020	174610	271480	121340	144410	214140	203200	91861	180340	107660	73298	130350	188060	174290
0.31308	2160800	1215600	2027200	2518100	1643100	2465000	2594700	2451900	2446900	3007700	3430100	2902400	2834600	1298900	2642000	2445300	977520	700410	631450	2301000	1072700
0.31342																							244800	112470	297750	99106	136670	191510	221970	144380	172100	158370	175090	271780	121070	144440	214420	202110	91877	181250	107930	73468	130310	188220	174700
0.31407	2170000	1218300	2030000	2521300	1646800	2469100	2598700	2459000	2451100	3013100	3437800	2910000	2838700	1310600	2645900	2448300	978440	702930	634650	2304400	1075700
0.31412																							245450	112330	297990	99567	136700	189780	222670	144150	172060	158870	174480	271710	119810	144590	215050	201370	92178	180890	108140	73383	130510	188230	175100
0.31447																							245580	112700	298530	99491	136980	191010	222910	144590	172280	158840	174110	272370	120730	145350	215730	201530	92677	181510	108120	73084	130150	188980	175040
0.31488	2177700	1222300	2034400	2524100	1649300	2474300	2601500	2463500	2457700	3021700	3445000	2915300	2843300	1303800	2643600	2451800	981050	705410	636270	2306700	1076800
0.31515																							246180	112720	298740	99429	137520	191220	223240	144590	172840	158710	174610	272950	121120	145740	216270	201280	91942	182730	108180	73000	130060	189310	175280
0.31555																							246950	113070	299160	99462	137790	192120	223730	145170	172990	158760	175290	272310	121420	145840	216560	201270	92107	183080	108310	74325	130360	189490	175390
0.31561	2188000	1223600	2037900	2528000	1653600	2475800	2606000	2470400	2462100	3026000	3445400	2921300	2845600	1306700	2646500	2456600	981380	708740	638440	2310900	1078100
0.31596																							247060	113360	299620	100070	137770	193180	223780	145550	172780	159110	175560	271830	122410	145650	216990	201240	92750	183850	108830	74138	130910	189670	175550
0.31664																							247380	113780	300700	99828	138230	193590	224360	145860	173210	158920	175770	270910	122720	146290	217250	201260	92785	184180	108660	74687	131260	190260	176020
0.31678	2197800	1224700	2043500	2530800	1655900	2480200	2610200	2475600	2468100	3032600	3452100	2925800	2851900	1312800	2645500	2460900	984470	711990	639950	2312300	1079900
0.31698																							248280	114160	300890	99931	138260	194300	224550	145610	173810	159070	176400	270410	122840	146680	217690	201420	92509	184290	108580	74451	131780	190410	176180
0.31752	2207500	1229700	2046900	2535100	1656900	2483900	2616100	2484000	2473100	3040700	3455800	2935300	2853700	1320400	2643200	2463300	986110	712580	641150	2317400	1082700
0.31775																							248300	114320	301280	100350	139140	195090	225070	146220	174070	159410	176970	270790	122740	146910	217940	201820	91932	184880	108740	74711	131540	190770	176630
0.31813																							248600	114490	301660	100480	139260	195430	225730	146290	174020	159670	176840	270400	123950	147090	219140	202470	92274	185720	108550	75292	131980	190930	176900
0.31851																							249320	114440	301780	100700	139750	195860	225800	146800	174140	159640	176880	270510	124030	147300	219110	203590	92591	185870	108350	75288	132240	191410	177180
0.31873	2213600	1229800	2050200	2535900	1663000	2488800	2618700	2488500	2477000	3045300	3458200	2939500	2858300	1328100	2642700	2466700	989560	715470	643720	2318200	1085600
0.31915																							249400	115000	302390	100930	139940	195980	226100	147060	174270	160020	177280	271280	124730	147700	217860	203940	92788	186450	109080	75699	132640	191940	177310
0.31935	2229800	1236200	2055600	2535700	1664400	2492700	2625200	2492200	2484900	3053900	3457700	2946000	2863700	1335200	2644800	2469700	991740	717940	644880	2322600	1086600
0.31949																							249820	115000	302870	101260	139840	195400	226740	146860	174470	160250	177370	270910	125100	147810	217020	204450	92720	186910	109090	76350	132980	192170	177530
0.32014																							250250	115060	303020	101230	140330	196110	227030	147310	174450	160380	178100	270950	126040	147860	217080	204870	93052	187220	109130	76349	133310	192380	178040
0.32051	2236100	1236200	2059600	2536300	1667900	2496400	2628900	2500400	2488100	3058300	3446300	2951500	2868800	1339600	2647000	2474100	993960	719950	646120	2324700	1089700
0.32055																							250530	115210	303500	101510	140410	196320	227180	147340	175480	160940	177780	269420	126230	147910	216610	205590	93069	188210	109570	77170	133450	192570	178310
0.32092																							250940	115280	304630	101940	140870	196590	227670	147670	175680	161110	178340	269050	126340	148360	215400	205640	93060	188330	108980	77030	133540	192920	178860
0.32119	2243600	1238400	2064300	2538400	1670400	2501800	2632700	2505600	2494400	3067400	3442800	2958000	2872700	1348400	2648600	2476300	996310	721810	648050	2330200	1091500
0.32158																							251390	115590	304550	102310	141100	197620	228290	147620	176250	161190	178260	268920	126780	148840	215050	206170	90471	188430	109360	76921	133910	193170	178840
0.32201																							251840	115630	305530	102590	141330	197710	228360	147750	176340	161680	178800	268740	126770	148690	214230	207020	89944	189160	109720	77694	134100	193480	179530
0.32225	2255100	1244100	2066700	2540400	1676600	2504700	2638000	2514300	2499100	3072300	3442600	2962000	2875000	1352800	2650700	2481100	997680	723840	649660	2332500	1094400
0.32265																							252390	115680	305410	102620	141270	197620	228850	148500	176580	162220	178620	268560	127060	148750	211910	207780	90426	189630	109190	76896	134780	193810	179580
0.32302	2263600	1246500	2072700	2542000	1678700	2509200	2639200	2518000	2505700	3081300	3440900	2967100	2874100	1364200	2652700	2483200	999920	725660	650490	2336900	1096200
0.32303																							252690	116010	305930	102750	141690	197770	228760	148560	177110	161920	178960	268790	127090	149240	211450	208910	90443	189940	109550	77789	135220	194080	179890
0.3234																							253210	116060	307110	102860	142120	198030	229470	148620	177530	162680	179570	268380	127650	149700	211230	209700	90156	190390	108250	78329	135700	194220	180370
0.32374	2272600	1247700	2076600	2545900	1681200	2513000	2643000	2525200	2511000	3087300	3353300	2973600	2873700	1370100	2654700	2486900	1001500	726810	652340	2341900	1100000
0.32407																							253940	116090	307290	103600	142300	198030	229860	148950	177730	162810	179410	268490	128170	149600	210990	209900	90687	190260	108870	78450	136220	195210	180910
0.32441																							254070	116210	308020	103790	142700	198140	229890	149110	177580	163250	180040	269030	128580	150000	211570	210810	90760	190380	108440	78987	136630	195200	181170
0.32482																							254370	116260	308440	103870	143600	198690	230720	149260	177540	163340	180660	268470	128800	149880	212010	211380	90682	190870	109090	79102	136850	195710	181280
0.32488	2256200	1250700	2080700	2549600	1685300	2515900	2647900	2531100	2516400	3096000	3358900	2977400	2871100	1380100	2654600	2490300	1005300	727020	652740	2346300	1101200
0.32548																							254590	116760	308700	104470	143430	198010	231220	149550	177980	163330	180780	268840	129230	150280	212260	212630	91097	190470	109140	79723	137290	196070	181460
0.32575	2246700	1252900	2085100	2551700	1686500	2520000	2652700	2538300	2521800	3101300	3359900	2985500	2873400	1383400	2654900	2493800	1008000	729040	654200	2348600	1105200
0.3259																							254810	116590	309230	104610	143460	198930	231450	149950	177630	164110	181440	269300	128950	150510	213000	213200	90877	190510	109250	80233	137560	196450	181840
0.32653																							255130	116530	309700	105010	144140	200240	231610	150450	177700	164400	181650	270050	130580	150470	211310	213870	91514	190680	109480	80308	137750	196760	181610
0.32688	2078400	1255500	2087200	2555900	1692300	2521300	2654700	2542300	2525200	3106000	3364000	2989000	2873200	1394200	2655900	2496900	1010100	729370	655750	2353700	1108000
0.32689																							255510	116930	310480	105450	144110	201150	231980	150410	178120	164630	181910	270120	130410	150460	211400	214970	91493	190570	109850	79930	137670	196910	181950
0.3273																							256160	117100	311120	106400	144530	200490	232690	150450	178020	165150	181820	271750	131350	150980	211330	215680	91629	191410	109920	79845	138130	197040	182030
0.32758	2086100	1258000	2094800	2560900	1695100	2529400	2659800	2547800	2531000	3114700	3368000	2996200	2874400	1401100	2657900	2499600	1011700	730280	657410	2360400	1111700
0.32789																							255970	117070	311510	105990	144990	201270	233030	150650	178150	164960	182420	273480	131490	151090	210120	215010	91263	191820	110400	79812	138820	197590	182470
0.32836																							256390	117360	311980	106390	145270	201770	232930	151160	178270	165280	182900	273320	132190	151290	210590	215470	91407	191960	110980	80445	138800	197980	182240
0.32869	2093200	1259800	2095900	2565000	1698000	2532400	2662700	2554700	2535200	3120300	3369800	2993500	2876500	1413500	2656600	2502800	1012100	733650	659040	2363100	1114200
0.32872																							257040	117830	312530	107230	146050	202070	233960	150680	178560	165750	183090	273310	132020	151650	210410	216050	91745	192770	110790	80344	138990	197830	182430
0.32939																							257140	118070	313200	107780	145850	201010	233970	151240	178920	165980	183440	274420	132520	152050	210540	217920	91104	192980	110580	81395	139380	198010	183240
0.32943	2104400	1262900	2101300	2568200	1699900	2537900	2661700	2560900	2541900	3128600	3373500	2998900	2878400	1419700	2657500	2504500	1015700	734450	660250	2367400	1117500
0.32977																							257430	118240	313410	107690	146700	200860	234320	151690	179260	166480	183790	274000	133370	152200	210930	218550	90618	193470	110810	82385	139330	198450	183070
0.33041																							257960	118260	314370	107990	146870	200590	234610	151640	179200	166360	183760	273570	133410	152450	211110	219880	90651	193800	110920	82633	139670	198890	183560
0.33053	2112400	1266900	2104000	2570600	1703600	2542600	2667000	2567300	2546400	3133800	3378600	3002700	2881900	1426800	2658300	2509700	1018600	736570	663240	2371100	1119000
0.33082																							258330	118390	314920	108370	147240	201160	234730	152060	179610	166970	184540	273380	133540	151970	211540	220550	90825	193980	111220	83019	139950	198470	183720
0.33118																							258670	118770	315560	108840	147360	200940	235240	151890	180110	167110	184360	274280	134330	152640	211970	221040	91359	194170	111180	83496	140660	199160	184060
0.33134	2123300	1266800	2107500	2575100	1707300	2547800	2665900	2572800	2552300	3142400	3383500	3006500	2884200	1432800	2662000	2512200	1020300	739220	665450	2376700	1122300
0.33183																							259480	118960	315360	109470	147720	201340	236110	152590	180280	167210	185110	274090	134550	153060	211630	221400	90898	194700	111120	83481	140610	199230	184090
0.33222																							259060	119170	315510	109390	148260	201780	235900	152580	180870	167900	185220	273660	135260	153380	211580	221970	90687	194720	111360	83949	141030	199350	184200
0.33252	2132600	1270100	2111800	2577600	1709200	2550700	2670300	2578700	2557800	3146800	3390400	3013000	2888900	1443500	2664100	2517800	1023300	739870	667110	2380200	1125000
0.33257																							259740	119360	316770	109870	148400	201870	236840	152850	180990	168100	185500	272650	134870	153690	211870	222760	90894	195330	111660	85530	141540	200200	184680
0.33325	2132300	1271600	2114200	2583000	1713100	2552400	2673500	2583700	2561000	3156100	3394800	3018000	2890400	1449500	2668000	2520100	1025600	741690	668900	2385100	1128200
0.3333																							259980	119930	316820	110000	148580	202110	236990	153060	180950	168400	186190	272070	135410	153490	212450	223100	91448	195870	111720	86328	141600	200100	184920
0.33367																							259980	120290	317090	110360	149200	202700	237590	153070	181000	168760	186690	272410	135230	153600	212490	223950	91353	196380	110410	87485	142280	200550	185340
0.33397	2145100	1276400	2120700	2584900	1715800	2556500	2674700	2588400	2567400	3161600	3398300	3003700	2892600	1458300	2672600	2524700	1027700	742620	670830	2388500	1131700
0.3344																							261030	119670	317530	110650	149790	203250	237810	153540	180730	169090	187030	271720	136090	154010	212210	223970	91187	196240	109980	88144	142260	201000	185140
0.33476																							261490	120330	318100	110930	149980	203180	238170	153960	181620	169140	187120	271880	136220	154070	212430	224910	91339	196480	110300	89503	143010	201120	185550
0.3351	2152500	1280400	2123200	2590200	1719200	2557700	2678900	2595700	2571700	3166500	3402700	3008000	2897500	1463500	2673200	2528300	1026900	744290	672560	2391600	1132200
0.33515																							261370	119990	318290	111120	150430	203110	238830	154080	181600	169450	187680	271640	136410	154600	212580	225890	92377	196690	109870	91070	142990	201610	185840
0.33582	2162000	1283800	2125300	2593100	1723400	2562500	2680600	2599700	2577600	3175800	3407700	3014700	2901300	1473400	2673900	2532100	1028900	746370	676340	2393400	1135400
0.33582																							261870	120350	318740	111610	150860	204120	239000	154210	181850	169520	187920	270910	136330	154780	212400	226520	92438	197050	110280	91856	143300	201690	186490
0.33622																							262190	120590	319540	111350	151060	203930	239390	154320	181670	169840	188010	270990	136880	155100	212640	227130	92790	197100	109210	93402	143640	202600	186680
0.33687																							262880	120430	320230	112060	151140	203970	239810	155180	181960	170350	188450	269640	137060	155220	213010	227690	93142	197500	109070	92633	144050	203030	185750
0.33694	2169900	1286700	2132600	2595000	1724600	2564400	2684100	2608100	2581500	3181000	3415400	3020400	2904800	1479500	2676300	2534500	1029900	748250	676790	2396100	1136800
0.33726																							263480	120720	320760	112330	151530	199050	240380	154900	182570	170600	188900	266930	137140	155600	212820	228140	92780	198340	109350	91690	144210	203550	185900
0.33761	2181800	1289500	2135200	2600300	1730400	2563600	2682100	2612300	2589700	3188200	3419400	3027300	2906900	1246200	2677900	2538700	1033500	748300	677990	2398800	1142000
0.33766																							263980	120750	321120	112390	151980	198330	240960	155140	182900	170830	188510	257080	137060	156060	213120	228490	91845	198220	109500	92181	144550	204100	186060
0.33828																							264370	120720	321780	112600	152510	199050	241320	155620	183610	170870	189520	253990	137990	155880	213100	229130	92241	198850	109610	91854	144670	205080	186180
0.33869																							264640	120800	321090	113270	152710	199690	241320	155780	183990	171030	189290	254230	137860	156120	213100	229430	92261	198260	109710	91945	144790	204770	186450
0.33872	2187100	1292000	2140000	2601100	1732800	2566200	2678400	2616700	2594800	3194400	3427000	3030700	2909100	1257300	2678900	2543000	1037200	750240	678540	2402700	1143700
0.3391																							265240	121050	321010	113350	153180	200330	241790	155710	183620	171770	189920	252670	138010	156190	213530	229780	92490	198750	109800	93624	145210	205380	187620
0.33951	2188200	1293200	2143200	2604600	1736200	2569100	2650300	2624000	2600900	3200800	3433000	3036100	2912600	1258400	2682200	2545300	1041200	753540	680660	2405000	1144500
0.33974																							265930	121310	321610	114070	153040	199890	242500	156180	183850	171740	190380	252800	138680	156730	213770	230500	92580	199090	110100	93275	145750	205960	188400
0.34018																							266140	121300	321940	114050	153330	198770	242980	156390	184230	171940	190790	252830	138770	156930	214010	230720	92843	199150	110240	93849	145630	206180	188370
0.34021	2198900	1296800	2146300	2605400	1738500	2570000	2651900	2628700	2604200	3207200	3439100	3043400	2918900	1264200	2686000	2550100	1042200	755360	682240	2411400	1147100
0.34083																							266290	121980	322030	114160	154030	199010	243440	156530	185060	172090	191510	252300	138910	157090	215230	231070	93048	199610	110430	93961	145700	205750	189060
0.34126																							266250	122240	322140	114240	154270	199050	243380	156590	185480	172170	191490	252200	138660	157210	215340	231440	92438	199630	110490	95541	146150	206280	189350
0.3414	2204000	1300200	2152800	2611400	1743000	2570800	2656900	2637000	2608800	3214500	3446800	3050000	2923700	1263900	2690600	2551900	1045700	757600	686100	2416100	1151300
0.34161																							266290	122530	321890	114730	154540	199210	244180	156990	185960	172710	192460	252480	139410	157730	216010	231890	92981	199780	110940	94015	146360	206090	189670
0.34229																							266040	122610	322250	115050	155250	200350	244240	157330	186510	173170	192790	252310	139980	158030	216170	231760	93464	200030	110640	94838	146320	205870	189800
0.34234	2215600	1302800	2156300	2614100	1745700	2573700	2660400	2641100	2614800	3220300	3452300	3057400	2929600	1265900	2691800	2557600	1047900	759870	688050	2421400	1152200
0.3427																							266590	123040	322710	115150	155200	200330	244170	157480	186410	173040	192890	253030	140200	158030	215850	231360	93545	200430	110820	95952	146600	206070	190250
0.3433																							266430	123010	322690	115650	155440	201030	244680	157300	187310	173360	193600	252050	140560	158370	216570	231220	93631	200620	110210	96559	146650	206200	190910
0.34347	2222400	1305000	2160500	2616500	1748600	2576200	2667400	2650100	2618400	3225900	3461000	3062000	2933600	1270600	2699800	2559500	1051500	762150	690110	2423700	1155200
0.34369																							267160	122910	323150	116060	155580	200100	245010	157790	187370	173570	193800	251190	140650	158510	216530	230900	94158	200680	110430	95956	147380	207030	191010
0.34411																							267220	123600	323120	116080	156040	200580	245450	158250	187630	174250	193970	249970	140920	158940	217160	230320	94238	201040	110230	97710	147270	207140	191360
0.3442	2229400	1306500	2163500	2619700	1752100	2579900	2668100	2654000	2624700	3234300	3465200	3070700	2938700	1263200	2702600	2562800	1052600	764820	691740	2429400	1158100
0.34481																							267370	123490	322760	117080	156660	200790	245750	158250	188120	174430	194280	249470	140670	158810	216830	229410	94428	201250	110680	97334	147750	206780	191630
0.34514																							267970	123440	322150	117030	156770	200800	246050	158560	188200	174630	192640	250000	141220	159100	216910	228880	94440	202310	110680	99136	147670	206810	191600
0.34535	2237500	1313300	2167900	2623300	1754700	2585600	2671200	2659400	2630300	3241300	3472600	3075100	2942500	1265400	2709000	2566200	1056400	768390	693910	2433000	1161500
0.34552																							266140	123760	322000	117360	157140	201830	246690	158750	188760	174760	192910	248600	141790	159550	216800	226700	94903	202200	111560	97272	147860	207260	192110
0.34603																							265320	123640	322110	117680	157970	202540	247050	159120	189220	175350	193080	247300	141910	159680	216910	226700	94675	202320	111180	97982	148080	207980	192440
0.34614	2239600	1315700	2171000	2627400	1760700	2587900	2674500	2667300	2637700	3248400	3478200	3083100	2945100	1269000	2712400	2571500	1058700	770150	694030	2436800	1164000
0.34643																							265330	123640	322550	116440	157850	203350	247440	159270	189210	175100	193650	246740	141860	160000	216980	226430	95302	202300	111380	97415	147740	208200	192590
0.34685																							266040	124110	322580	116510	158100	202970	247740	159430	189210	175570	194360	245930	142070	160470	216970	226270	95541	202170	111680	100970	148410	208180	193050
0.34729	2249600	1319200	2174000	2630500	1762300	2593200	2680700	2671700	2641800	3253600	3486700	3087800	2951800	1275400	2716700	2574500	1061900	772730	695190	2439700	1167400
0.34745																							266070	124290	322890	116540	158770	203710	248070	159780	189190	175920	194540	246510	142170	160520	216960	226990	96391	202650	111540	102510	148330	207880	193300
0.34784																							266120	124290	321200	117120	159040	202390	248380	159950	189140	176360	195010	246560	142180	160800	217180	226950	96010	203010	112030	102520	148680	207820	193190
0.34819	2259200	1319100	2180300	2634300	1765200	2595900	2685200	2679500	2649000	3261500	3492700	3093200	2955000	1276100	2721400	2577600	1063800	773850	695790	2443400	1169000
0.34848																							266010	124550	321220	117480	159680	200220	248720	160030	189050	176150	195310	247550	142800	160970	217130	226870	96723	202760	111950	102200	148950	207650	193860
0.34888																							266300	124580	321800	118020	159630	200620	249180	160130	189050	176340	195540	247040	143170	161520	217230	226260	96849	202810	111990	103310	149040	207120	193950
0.34927																							266580	124640	321750	118560	159950	199090	249350	160530	188710	176950	196020	246220	143570	161260	216210	226130	96577	202810	112220	107030	149320	207200	193960
0.34939	2267700	1324000	2184000	2638200	1769600	2594500	2687900	2683800	2652900	3267800	3500500	3100700	2962100	1276200	2726600	2580500	1067000	775490	699100	2449500	1170900
0.3499																							266830	125180	321690	118310	160610	199320	249960	160990	188920	176900	196610	244220	143780	161710	215120	226040	96648	202920	112600	106150	149450	206980	194660
0.35007	2277500	1326200	2189200	2640300	1772000	2599200	2694600	2692500	2655800	3275800	3506000	3104400	2966600	1287100	2728200	2584300	1068200	776610	699790	2451100	1173600
0.3503																							267130	125560	321910	118660	160890	199900	250590	161070	188560	176980	196980	242960	144450	161940	215220	226070	97165	203120	113010	108330	149450	206880	194810
0.35068																							267300	125740	321890	119090	161830	200930	250820	160750	189120	177820	197420	242280	144420	162220	215510	226400	97369	203150	113050	109230	150160	207150	194550
0.35074	2283400	1329600	2192400	2646200	1776500	2602900	2698700	2697300	2664100	3280900	3512500	3112500	2972700	1291200	2729900	2586800	1070600	779730	701430	2456300	1176700
0.35133																							267180	125850	322180	119680	162020	201070	251080	161580	188530	177820	198160	241530	144510	162220	215330	226480	97600	203200	113600	109510	150140	207010	194870
0.35171																							267290	126510	322480	119920	162140	200340	251950	161920	186880	178020	198480	241880	145440	162370	214810	226440	97271	202970	113810	110500	150860	206980	195010
0.3519	2293600	1333100	2195300	2649500	1779000	2608700	2703200	2702600	2668100	3285400	3520200	3116300	2976300	1298300	2732500	2589100	1070800	781190	703120	2460100	1178400
0.3524																							267970	126370	322350	120260	162580	200660	252260	162180	187160	178120	198830	242510	145470	162670	214720	226410	97607	202940	113730	111500	150980	207240	195300
0.35271	2299400	1334200	2200400	2654100	1783400	2611500	2707400	2709400	2674900	3296400	3525400	3123800	2982500	1299300	2734000	2594000	1072900	785280	704570	2465300	1178800
0.35283																							268510	126360	322630	120570	163280	201930	252530	162290	187250	178710	198990	242970	145700	162380	214990	226940	97513	203280	113790	112330	151340	207480	195470
0.35316																							268890	126710	323080	120990	163520	201980	252920	162500	186690	178910	199260	243070	145940	162700	214980	226790	97991	203840	113620	113150	151660	207930	195580
0.35387																							269080	126320	323850	121370	163980	202860	253310	162670	186880	179360	199870	243860	146720	162380	214030	226900	97951	204070	113690	114120	151900	207770	196410
0.3539	2305300	1337800	2203500	2655700	1786000	2617300	2711100	2714100	2678800	3298600	3533300	3129700	2984700	1303400	2735400	2596700	1074800	785540	705600	2467100	1181300
0.35429																							269570	126610	324110	122020	164290	203330	253280	163020	186450	179450	199520	244380	147020	163340	214170	227290	98455	204140	113620	111490	152490	207830	196810
0.35464	2321000	1338600	2207800	2657400	1788200	2621600	2716800	2721900	2684800	3307400	3539600	3134300	2989900	1306400	2737400	2600700	1075100	787990	707450	2472000	1183200
0.35466																							269850	126850	324420	122090	164840	204110	253810	163120	186550	179930	199850	244500	147430	163350	214250	226970	98164	204210	113930	110430	152600	207920	196780
0.35542																							270380	126960	324880	122010	164950	205210	254020	163350	185930	180250	199720	245170	148500	163670	214240	227210	98202	204560	114200	111640	153070	207820	197060
0.3558																							270490	127200	325520	122270	165360	205310	254660	163680	185950	180300	199790	245370	148050	164120	214330	226640	99065	204890	114220	111320	153230	208310	197410
0.35585	2326100	1341300	2210200	2659800	1793100	2626800	2720400	2728000	2689500	3311900	3545800	3139000	2991600	1313800	2740500	2603400	1074200	791140	708860	2475100	1185400
0.3565																							269680	127440	325980	122450	165600	207190	254820	163650	185730	180480	200130	246570	148760	164580	214340	226490	99368	204690	114560	111170	153170	208160	197720
0.35662	2341100	1346100	2216400	2662100	1795200	2633100	2726000	2734000	2696200	3320100	3552300	3143400	2996200	1319000	2742600	2607600	1076500	794320	710180	2478800	1187500
0.35687																							269910	127810	326070	123080	166390	207360	255390	163980	185740	180570	201370	246090	148770	164880	214030	226470	98936	204810	114420	110670	153670	208420	198100
0.35732																							268160	128230	327080	123490	166360	207680	255790	164030	185620	181080	201660	246610	148950	164880	213150	227030	99838	205430	114410	110220	154000	208990	198350
0.35776	2345500	1351000	2221200	2666500	1799500	2636800	2730700	2738700	2701000	3325900	3560500	3152200	3000600	1326100	2746200	2610400	1077800	798880	711690	2481600	1191400
0.35806																							254750	127830	327440	123870	166960	207940	256050	164790	185430	181280	201830	247180	149420	165200	213510	227260	99699	205050	114370	108460	154350	208870	198630
0.35838																							254130	127910	327790	124140	167730	207000	256380	164730	185300	181510	203150	248000	149800	165070	213410	227910	100110	204570	114590	113730	154870	209680	199060
0.35856	2350200	1352200	2222900	2669200	1801500	2641200	2736900	2743000	2704200	3329700	3567100	3156800	3005200	1330400	2748900	2614600	1079100	801680	714760	2485600	1193400
0.35909																							254290	128080	328600	124560	167790	207100	256750	165170	185410	181710	203580	247020	149850	165310	214180	228100	99950	204690	115030	111940	155130	209790	199250
0.35923	2361300	1354200	2228700	2673900	1804600	2641200	2741400	2751200	2710500	3338200	3572300	3165700	3009100	1337000	2752200	2617000	1082900	803980	715420	2489300	1197300
0.35952																							254290	128620	329350	124800	168480	207470	256910	165380	184930	181980	204640	246970	150190	165610	214480	228420	100290	204510	115080	113860	155220	210700	199930
0.35987																							254360	129060	329670	125300	168550	207900	257470	165460	185200	182360	204710	244680	150710	165930	214090	229210	100550	205330	115620	113880	155620	210620	200080
0.36034	2371100	1358900	2230900	2676000	1807900	2641300	2747600	2755500	2714000	3342400	3580500	3170500	3012200	1346300	2752600	2622100	1085100	808150	716570	2493200	1201000
0.36055																							254750	129360	330070	125780	168850	208160	257770	165940	185340	182300	205340	243310	150680	166220	214650	229400	100170	205330	116010	114200	155520	210730	200490
0.3609																							254510	129380	330610	126210	169310	208640	258320	166380	185710	182950	205870	242640	151240	166450	215130	229900	100700	205700	116120	114810	155880	210860	200910
0.36119	2381900	1363600	2236300	2679800	1810800	2644000	2751300	2763300	2719400	3351600	3584900	3178800	3020000	1355300	2754900	2624900	1088000	809690	719270	2495500	1202900
0.36128																							255410	130310	331570	126670	169600	209840	258250	166000	186330	183040	206170	241990	151580	166510	215600	230210	100830	205930	116430	115640	156410	211410	201350
0.36201																							252650	130440	331900	126620	170530	202740	258750	166470	186410	182970	207020	242570	151380	167140	216040	230760	100740	205960	116650	116210	156510	211800	201680
0.36242	2388300	1363000	2240400	2683200	1814300	2647000	2755300	2767700	2726400	3356800	3594000	3183800	3023800	1360400	2758800	2628400	1091000	813730	721180	2499400	1205400
0.36245																							252070	130690	332320	126920	170940	203410	259150	166890	186650	183760	207220	242830	151800	166930	216890	231930	101510	205900	116690	114960	156940	212040	202460
0.36309																							252780	130980	332880	127380	170940	202970	259660	167010	187200	183840	207440	243120	151790	167130	217250	232240	101840	206180	117040	117550	156870	212360	202850
0.36312	2394000	1367200	2242700	2685300	1818000	2646900	2761400	2772900	2733000	3364600	3599400	3192300	3028000	1363400	2757800	2631200	1095600	815440	721770	2502600	1208900
0.36355																							253060	131400	333520	127620	171430	201790	260160	167260	187690	184190	208370	243190	151910	167480	217190	233160	102130	206180	117180	119510	157040	212630	203820
0.36391																							253290	131370	333900	127690	171910	200980	260570	167560	188050	184320	209320	242940	152360	167840	217480	233590	101630	206180	117850	119080	157580	213160	204120
0.36435	2403500	1369700	2249000	2690300	1821700	2648600	2764900	2779900	2735800	3371400	3607600	3197000	3030800	1374700	2756900	2635300	1096500	816220	725090	2504500	1212300
0.36458																							253330	131320	334870	128350	172400	199960	260890	168160	188600	184610	209420	242280	152550	167900	217990	233980	102490	206680	118050	121210	157620	213540	204190
0.36503																							252620	131510	335290	128660	172990	199350	261440	168380	189210	185330	209030	241290	153080	168430	217880	234150	102380	206900	118240	119280	158020	214210	204120
0.3651	2408400	1370900	2252100	2691200	1824700	2655000	2770900	2784900	2740500	3379400	3611600	3206200	3035400	1379600	2755100	2637800	1101600	817980	725200	2507700	1213400
0.36564																							252800	131650	335240	129520	173540	197280	261810	168010	189940	185310	209660	241280	153150	168580	218230	234460	102380	207070	118660	118630	157780	214310	204530
0.36607																							253510	131970	336200	129290	173910	197180	262310	168780	190060	185460	209710	240980	153630	168550	216840	235530	102800	207940	118160	120870	158330	215400	204640
0.36622	2421900	1373100	2256400	2696500	1826400	2657900	2775000	2791300	2746700	3383300	3618400	3208100	3038400	1388200	2750600	2642900	1103600	820360	728080	2510700	1216500
0.36648																							253340	131800	336890	129650	174130	196590	262950	168500	190520	185750	210200	237410	153940	169320	215490	235720	103250	208070	119200	121680	158480	215590	204640
0.36693	2427500	1376600	2259700	2700400	1829600	2664000	2777900	2797500	2750500	3387500	3622900	3212000	3042800	1395400	2748900	2645500	1107200	820640	730180	2512200	1218100
0.3671																							252960	131950	337050	130250	174570	196220	263300	168880	190790	185910	210490	233780	154480	169420	215690	236070	103710	208360	119210	126330	158800	216490	204700
0.36754																							253100	132080	337590	130400	175540	195450	263790	169390	191290	186400	210860	229980	154720	169350	215690	236270	104520	209190	119770	127500	159070	216730	205160
0.36766	2435000	1381100	2263100	2702600	1832300	2667700	2784100	2804100	2758400	3393900	3625500	3220300	3044500	1407300	2748400	2647800	1109700	821260	731330	2515400	1221300
0.368																							253080	132840	338240	130890	175460	194410	263410	169270	191440	186520	211870	229610	154640	169780	216010	236050	104830	209210	120450	128510	159020	216650	205380
0.36871																							253900	132730	339050	131450	175620	194460	263950	169770	191890	186940	212050	229620	155230	170260	216720	237770	103900	209600	119980	130350	159010	218230	205420
0.36883	2442200	1383400	2269300	2706600	1837200	2671500	2788300	2808700	2763700	3400900	3634700	3224800	3047600	1412500	2744800	2652300	1113300	820620	732870	2517500	1218400
0.36907																							254310	133110	339070	131690	176120	194770	264870	169990	192120	187230	212740	228770	155470	170090	217410	238310	104880	209700	120400	132980	159600	218610	206390
0.36964	2445600	1384300	2273100	2710800	1838800	2676800	2794900	2813100	2769900	3409300	3638700	3232500	3050400	1422400	2731800	2654200	1117000	821880	734130	2520700	1218600
0.36979																							255030	133180	339690	132500	176600	193860	265590	170400	192450	187290	213110	228350	155790	170230	217200	239500	104550	209660	121130	136480	159630	218780	206850
0.37026																							255530	133440	340460	132480	177380	193440	265480	170550	193080	188000	213830	227040	156100	170510	217340	239510	104820	210100	121340	137760	159880	219270	207480
0.37064																							256050	133950	341130	133000	177250	194290	266010	170650	193440	187960	213710	227610	156390	170720	217450	241440	104620	210190	121660	139310	160190	220200	207760
0.37087	2456100	1388300	2277400	2714600	1843400	2680900	2798800	2820700	2776300	3413000	3647000	3238400	3053300	1427200	2726200	2658500	1120200	823090	734530	2523000	1222500
0.37136																							256250	134030	341520	133080	177790	193650	266590	171100	193810	188170	213780	227010	156410	170900	217190	241810	103980	210440	121570	140990	160490	221580	207970
0.37162	2464300	1392000	2279900	2716900	1846300	2688800	2802900	2826400	2784200	3420100	3653100	3245300	3056400	1437800	2718000	2661700	1122200	823390	737170	2527800	1225000
0.37189																							256830	134470	342280	133420	178300	193780	266660	171240	194150	188710	214160	227440	157100	170880	217130	242900	104430	210300	122240	141190	160500	223510	208360
0.37253																							257620	134190	342850	133690	178820	194550	267180	171530	194970	189010	214710	227180	157380	171440	217090	243390	104690	210610	122650	142640	160920	224190	208440
0.37286	2471400	1396700	2283600	2722600	1848100	2691100	2807900	2834300	2788800	3426900	3661500	3249100	3055300	1445900	2718900	2665500	1124600	824030	736680	2531900	1227500
0.37293																							258030	134720	343990	134630	179080	195170	267280	171750	195270	189230	215480	227540	157590	171920	216530	243560	104550	210700	123350	142340	161210	225240	209120
0.37334																							258930	134690	344150	134790	179650	195800	268200	171980	195600	189420	216210	228210	157620	172080	216930	244750	104570	211130	123340	143710	161370	225930	209520
0.37359	2479400	1398500	2289300	2725500	1851700	2697600	2813300	2838100	2797200	3435900	3667200	3254400	3059100	1456300	2718600	2668500	1127700	824230	739450	2536300	1228900
0.37405																							258350	134780	344840	135080	180050	196500	268490	172520	196230	189680	216640	228370	157970	172330	217030	245460	104370	211240	123560	146230	161700	226720	210270
0.37444																							259120	134810	346000	135340	180910	196780	268990	172660	197130	190100	217290	228790	158150	171930	217690	245190	104180	211570	123590	145360	162050	228580	210230
0.37471	2486500	1400600	2291900	2727300	1854300	2701500	2814400	2845600	2801100	3440800	3673800	3261500	3058200	1463800	2720200	2671900	1130000	825370	741880	2538100	1233200
0.37516																							259020	135170	346000	135710	180890	196280	269590	173020	197620	190250	217690	228880	157950	172420	218030	245980	104450	211630	123900	146590	162150	230200	210510
0.37548	2495900	1405700	2298400	2732000	1857900	2706200	2818200	2851400	2805500	3445700	3679700	3267100	3063300	1471800	2718300	2673800	1133600	825620	744120	2543000	1235600
0.37555																							259550	135240	346600	136190	181410	197390	269730	172940	197510	190650	218310	229080	158670	172640	218790	246490	104190	211940	124180	146260	162830	232550	211370
0.37595																							260200	135690	348000	136740	182030	198150	270190	173300	198180	190930	218060	229840	158570	172730	219340	246870	104550	212420	124260	146220	163130	233260	211630
0.3762	2504000	1408400	2301800	2734900	1860700	2710300	2823300	2856600	2813900	3452400	3683900	3274800	3064400	1475700	2718600	2678600	1135300	826740	746570	2546400	1239300
0.37664																							260340	135620	348050	137110	182220	199020	270570	173820	198470	190880	219210	229570	158740	173050	219920	247350	104720	212640	124600	145990	163200	235650	212820
0.37707																							260700	135730	349060	137150	183210	198440	270370	174180	198910	191570	219400	230200	159300	173110	219750	247360	105300	212860	124940	146030	163310	236840	212340
0.37739	2513200	1411000	2305200	2739900	1864000	2713500	2826100	2863800	2818600	3458800	3692000	3279000	3070400	1481100	2715600	2679700	1137900	829100	750510	2551500	1241100
0.37782																							261450	136140	349260	137420	183400	199060	271040	174070	199110	191890	219340	230650	159680	173380	220180	247950	105260	213200	125120	145060	164000	237550	212370
0.37818	2523100	1413000	2310600	2743100	1867400	2719700	2830300	2869200	2825400	3465800	3698800	3286600	3072400	1487500	2713700	2684300	1140800	829030	750910	2557400	1243900
0.37819																							262040	136400	349700	138160	183750	198480	271210	174400	199320	192170	219630	231720	159910	173630	219800	247760	105200	213450	125290	146390	164020	239270	211570
0.37864																							262380	136530	350900	138240	184590	197830	271520	174630	199840	192390	219600	230730	160260	173960	220050	248990	105240	213670	125810	147810	164330	240130	211920
0.37929																							263610	137050	351030	138680	184380	197390	271590	174970	199630	192520	220470	231670	160590	174510	220310	249120	105430	214020	125980	144370	164680	242380	212190
0.37943	2530400	1415600	2313400	2747700	1869600	2720800	2834100	2875900	2829800	3470500	3706400	3291800	3075300	1492500	2709000	2686000	1145000	831570	753730	2562200	1246300
0.37968																							263900	137280	351530	139260	184910	196900	271440	175320	200160	192730	221190	231710	160750	174660	220810	249500	106100	214220	126140	145320	164770	243830	213100
0.38019	2543200	1417900	2320500	2750700	1875200	2726500	2841100	2881500	2837100	3478200	3711800	3298700	3077400	1498900	2710300	2691700	1146700	831760	756740	2568600	1248900
0.38042																							264420	137340	352420	139380	185660	196780	267310	175700	200460	193250	220610	231960	160940	174980	221500	249380	106150	214660	126120	149950	165100	244720	213180
0.38082																							264620	137400	353110	139600	185730	197520	263850	175780	200630	193310	221230	233620	161680	175430	221960	249490	105640	214590	126790	151510	165190	245730	213500
0.38124																							264300	137180	353280	139930	186110	196720	263360	176130	200540	193780	221120	233160	161580	175820	222330	249550	105570	215360	126710	148430	165600	246510	213210
0.38144	2550400	1420600	2322900	2753800	1876600	2730000	2843200	2889100	2842200	3482900	3720900	3304100	3077500	1504900	2710600	2694400	1151100	833830	760870	2571300	1250200
0.38189																							265370	137730	354080	140290	187410	196990	262790	176270	200420	194090	221480	233280	161800	176130	222550	249460	106100	215620	126620	151460	166010	247490	213420
0.38221	2556200	1424600	2327700	2759800	1880500	2732000	2847300	2894300	2849100	3491300	3726200	3308800	3064100	1512100	2712100	2696500	1153300	835700	761700	2575900	1254300
0.38227																							265180	137590	354410	140470	187470	198100	262780	176220	200430	194370	221670	234370	162010	175830	222650	250580	107080	216170	126990	151430	166080	247620	213490
0.38264																							265630	137870	355000	140850	188270	197270	261570	176480	200690	194630	222150	234360	162070	176550	223240	250650	106650	216410	127210	149430	166460	247500	213910
0.38334																							266210	137930	355490	141310	188660	197280	261550	176700	200880	194850	222100	235040	162330	176180	222760	251170	107020	216860	127160	151280	166500	247910	214250
0.38337	2567700	1426700	2331000	2761700	1883400	2739400	2851800	2898400	2854500	3496600	3734900	3317300	3062900	1519500	2719000	2701000	1158600	838370	764400	2578000	1258300
0.38385																							266920	138310	355810	141500	189500	196470	261180	177180	201180	195090	222590	235220	162920	176980	223390	251260	106690	217290	127530	151960	167100	247510	214360
0.3841	2574000	1429600	2334800	2767500	1887500	2742000	2855000	2906700	2858600	3501900	3739600	3322300	3063400	1529800	2722700	2702300	1160800	841170	767030	2582700	1261500
0.38462																							266970	138600	356570	142280	190160	196220	261390	177630	201520	195260	223000	235710	162890	177520	223340	251610	105480	217180	127660	153230	167040	247220	214920
0.38482	2583800	1433100	2341500	2770800	1890400	2748300	2859900	2912000	2865300	3510100	3743600	3329000	3064700	1535100	2726900	2706400	1162800	843490	769230	2585900	1264200
0.38516																							267750	138760	357220	142470	190160	195410	260810	177970	201830	195900	224050	236120	163390	177660	223560	251410	106340	218110	128030	154510	167260	246440	215610
0.3855																							268360	138870	357420	143150	190810	196330	260530	177820	201450	196100	224600	236210	163410	177990	224150	251230	105690	218430	127840	155130	167420	246100	216510
0.38599	2594100	1434100	2344300	2773600	1893700	2753100	2864300	2920000	2870300	3514200	3753800	3333000	3067400	1542200	2725800	2709400	1163400	844770	770730	2586900	1264500
0.38626																							268520	139300	358230	143690	191500	195310	260270	178530	201860	196130	224830	237360	163510	178100	224170	251450	105610	218800	129040	154820	168000	245680	217010
0.38665																							268940	139300	357940	143700	191900	196630	259780	178740	202080	196510	225730	238010	163720	178880	224710	251680	105810	219910	128960	157110	167860	246240	216660
0.38685	2600700	1439700	2348000	2779400	1897100	2759500	2868900	2925300	2876200	3522800	3759300	3340700	3068000	1547100	2721400	2713200	1165000	846670	773310	2590700	1267800
0.38727																							268250	139510	358700	144300	192320	196330	260100	179020	202330	196650	226450	238370	164060	179080	224870	250470	106100	219970	128910	158470	168030	245510	217030
0.38766																							268450	140240	358900	144780	192630	197580	260030	179090	202830	197220	226290	239170	164560	179350	225460	248940	106060	220640	129410	157090	168330	244370	216810
0.38804																							269160	140420	359560	144730	193110	196900	259680	179510	203080	197250	226480	239270	164700	179700	225800	246380	106200	220980	129860	160410	168670	243180	216110
0.38812	2609200	1441700	2353400	2783800	1899100	2764100	2872800	2934300	2881900	3527600	3767200	3345700	3063800	1558300	2717300	2715600	1165100	848430	773970	2593400	1269200
0.38872																							269390	140730	360200	145410	194170	196100	259640	179620	202920	197630	227080	239950	165410	179980	225890	245490	105970	221330	130040	162590	168930	243230	216360
0.38884	2613500	1444000	2358600	2788300	1904000	2770200	2875900	2938700	2890200	3534600	3764700	3351100	3064200	1563200	2710300	2720100	1167200	851580	776160	2598500	1272800
[truncated: 3,941 more rows]

## Sheet: Fig. 3d
	Fn				GSSG				DTT
	Time	Stress			Time	Stress			Time	Stress
	0.016701	375420			3.1367	82980			0.016701	2.2242e+05
	0.0333	3.8520e+05			3.2033	82078			0.049999	2.2192e+05
	0.1	3.9128e+05			3.2367	86038			0.1	2.1363e+05
	0.1	3.7227e+05			3.2533	86152			0.1333	2.1776e+05
	0.1333	3.4510e+05			3.2867	84569			0.1833	2.1214e+05
	0.15	2.9976e+05			3.32	84202			0.2167	2.1215e+05
	0.2167	2.9238e+05			3.3533	85408			0.25	2.1209e+05
	0.2333	3.1104e+05			3.4033	84960			0.3	2.2017e+05
	0.2833	2.9847e+05			3.4367	79038			0.3333	2.1245e+05
	0.3	2.3995e+05			3.47	86051			0.3833	2.2052e+05
	0.3333	2.4724e+05			3.5033	83467			0.4167	2.2218e+05
	0.4	2.0882e+05			3.5367	85969			0.45	2.1621e+05
	0.4333	2.0062e+05			3.5533	83349			0.5	2.1828e+05
	0.45	1.9228e+05			3.6033	86050			0.5167	2.1622e+05
	0.5	1.8504e+05			3.6367	81649			0.5833	2.1944e+05
	0.5333	1.9754e+05			3.6533	83673			0.6167	2.2083e+05
	0.5833	162380			3.7033	84746			0.65	2.2022e+05
	0.6	1.6398e+05			3.72	81854			0.7	2.1072e+05
	0.6333	1.6879e+05			3.7533	85873			0.7167	2.1058e+05
	0.6667	1.5343e+05			3.8033	86880			0.7667	2.1110e+05
	0.7	1.5775e+05			3.8367	86577			0.8	1.9815e+05
	0.7333	1.5251e+05			3.8533	81984			0.8333	1.9395e+05
	0.7833	1.5509e+05			3.9033	81394			0.8833	1.7961e+05
	0.8	1.3680e+05			3.9367	83166			0.9167	1.7822e+05
	0.8333	1.1267e+05			3.9533	77704			0.9667	1.7571e+05
	0.8667	96799			4.02	81220			1.0167	1.7383e+05
	0.9	92529			4.0367	79728			1.05	1.6712e+05
	0.9333	1.0251e+05			4.0867	84252			1.0667	1.6914e+05
	0.9833	1.0519e+05			4.12	78847			1.1	1.5724e+05
	1	78599			4.1367	85926			1.1667	1.4991e+05
	1.0333	88588			4.1867	81466			1.2	1.5273e+05
	1.0667	85524			4.22	88100			1.2333	1.4232e+05
	1.1	75946			4.22	85051			1.2667	1.3488e+05
	1.1333	1.0085e+05			4.2867	82476			1.3167	1.3261e+05
	1.1667	1.0906e+05			4.32	77599			1.3667	1.2062e+05
	1.2	1.0792e+05			4.3367	85747			1.4	1.2161e+05
	1.2167	1.1031e+05			4.4033	83090			1.4333	1.2370e+05
	1.2833	1.0846e+05			4.42	84585			1.4667	1.2369e+05
	1.3167	1.0609e+05			4.4367	84348			1.5	1.2088e+05
	1.3333	1.0348e+05			4.4867	78588			1.5667	1.2868e+05
	1.3833	85275			4.52	82526			1.6	1.2554e+05
	1.4	77971			4.5533	81135			1.6333	1.1792e+05
	1.4333	94297			4.5867	84810			1.6667	1.1780e+05
	1.4833	1.1019e+05			4.6033	83187			1.7	1.2064e+05
	1.5167	1.1028e+05			4.67	82108			1.7667	1.1330e+05
	1.5667	1.0733e+05			4.6867	80936			1.7833	1.0742e+05
	1.5833	1.1313e+05			4.72	80068			1.8167	1.1019e+05
	1.6167	1.1612e+05			4.7533	84728			1.8667	1.0855e+05
	1.6667	1.1778e+05			4.7867	77782			1.9	1.0290e+05
	1.7	1.2125e+05			4.82	81453			1.95	1.0457e+05
	1.7167	1.2336e+05			4.87	83721			2	1.0619e+05
	1.7667	1.2134e+05			4.8867	83356			2	1.0311e+05
	1.7833	1.1556e+05			4.92	85272			2.0667	1.0737e+05
	1.8167	1.1371e+05			4.97	82262			2.1	1.0464e+05
	1.8667	1.2535e+05			5.0033	84809			2.15	1.0557e+05
	1.9	1.3719e+05			5.0367	81470			2.1833	98777
	1.9333	1.2136e+05			5.0867	82543			2.2	90300
	1.9667	1.1490e+05			5.12	79477			2.2667	91551
	2	1.2078e+05			5.1533	80937			2.3	91971
	2.0167	1.3825e+05			5.1867	78638			2.35	83871
	2.0833	1.3604e+05			5.2033	82444			2.3667	88051
	2.1	1.5298e+05			5.2533	82323			2.4	83564
	2.1333	1.3440e+05			5.2867	80230			2.4667	78450
	2.1667	1.5142e+05			5.32	82692			2.5	79696
	2.2	1.3456e+05			5.3533	82821			2.55	71889
	2.25	1.4171e+05			5.37	79078			2.5667	67962
	2.2667	1.2254e+05			5.4033	78180			2.6	66071
	2.3	1.3586e+05			5.47	80242			2.65	65517
	2.35	1.4226e+05			5.5033	78187			2.6833	56824
	2.3667	1.4716e+05			5.52	80642			2.7333	59769
	2.4	1.6963e+05			5.5533	78703			2.7667	60262
	2.45	1.5133e+05			5.5867	79242			2.8	57565
	2.4833	1.4581e+05			5.62	85100			2.85	58227
	2.5	1.4455e+05			5.67	82550			2.8833	57712
	2.5333	1.5802e+05			5.7033	81068			2.9333	55665
	2.5667	1.6206e+05			5.72	79550			2.9667	55058
	2.6	1.6030e+05			5.77	81740			3	54653
	2.65	1.7114e+05			5.8033	79400			3.05	56204
	2.6667	1.6397e+05			5.8533	79033			3.0833	59826
	2.7	1.8008e+05			5.8867	81589			3.1167	57198
	2.75	1.9170e+05			5.9033	83701			3.15	56904
	2.7667	1.9644e+05			5.9533	83756			3.2	57847
	2.8	2.1486e+05			5.9867	80962			3.25	54805
	2.85	2.1107e+05			6.02	80750			3.2833	62321
	2.8833	2.1107e+05			6.07	79118			3.3167	54387
	2.9	1.9639e+05			6.0867	77508			3.35	53478
	2.95	1.6981e+05			6.1033	83237			3.3833	58355
	2.9667	1.7032e+05			6.17	75528			3.45	58061
	3	1.5900e+05			6.2033	79877			3.4833	54334
	3.0667	1.7600e+05			6.2533	77632			3.5167	54552
	3.0667	1.7912e+05			6.2533	81946			3.55	56476
	3.1167	1.7266e+05			6.2867	79705			3.5833	55893
	3.15	-425.41			6.3367	81105			3.65	47702
	3.1833	-610.22			6.37	80535			3.6667	41708
	3.2333	8983.3			6.4033	81169			3.7167	43870
	3.25	13550			6.4367	83140			3.75	44534
	3.2667	9648.2			6.47	76007			3.7833	40586
	3.2833	3673.8			6.4867	77468			3.8333	41500
	3.35	-5019.3			6.5367	81616			3.85	41455
	3.3833	19246			6.57	75869			3.9167	43939
	3.4333	40698			6.6033	79142			3.95	40724
	3.4333	26208			6.6367	81474			3.9833	44516
	3.4667	24980			6.67	77610			4.0333	41817
	3.5167	24811			6.6867	78390			4.05	37628
	3.55	30817			6.7533	76549			4.1167	42226
	3.5667	27919			6.7867	79717			4.15	45735
	3.6333	20937			6.82	80996			4.1833	49999
	3.6333	21862			6.8367	80903			4.2333	55257
	3.6667	21240			6.87	76582			4.25	50799
	3.7333	18127			6.9367	79258			4.3	51448
	3.75	9062.7			6.9533	77524			4.3333	55850
	3.7833	25057			6.9867	78090			4.3667	56189
	3.8167	26033			7.02	78744			4.4167	57336
	3.85	30114			7.0533	74755			4.45	56734
	3.8667	32370			7.0867	79350			4.5	57686
	3.9167	39860			7.1367	77309			4.5333	55352
	3.95	43056			7.17	74303			4.5667	55041
	3.9833	47669			7.1867	76571			4.6	51168
	4.0167	63805			7.2367	76350			4.65	48373
	4.0333	54599			7.27	78452			4.7	49357
	4.0667	55913			7.32	75459			4.7333	47975
	4.1167	49434			7.3533	77779			4.7667	47384
	4.15	55374			7.37	78855			4.8	44557
	4.1833	55309			7.42	77732			4.8333	50937
	4.2167	48112			7.4367	78782			4.9	57087
	4.25	51157			7.47	78891			4.9333	52778
	4.3	57034			7.52	78425			4.9667	51225
	4.3333	57883			7.5533	78078			5	47439
	4.3667	42252			7.5533	76985			5.0333	52309
	4.4	42770			7.62	78659			5.1	54556
	4.4167	46900			7.6367	75930			5.1333	55620
	4.45	48830			7.67	78524			5.15	56450
	4.5	60245			7.72	77589			5.2	57526
	4.5333	56163			7.7367	78383			5.2333	60742
	4.55	53640			7.77	77829			5.3	60468
	4.6	65181			7.82	76494			5.3333	60430
	4.6333	66878			7.8533	73493			5.35	62275
	4.65	67802			7.87	76213			5.4	63515
	4.7	59941			7.92	76127			5.4333	63899
	4.7333	64816			7.9367	80814			5.4833	57263
	4.75	64271			7.97	77367			5.5167	57066
	4.8	67598			8.02	77592			5.5333	62145
	4.8333	71913			8.0533	78492			5.6	58591
	4.85	75414			8.0867	78606			5.6333	57423
	4.9	72128			8.12	79026			5.6833	57923
	4.9333	71605			8.1533	79281			5.7167	59163
	4.95	77838			8.2033	77611			5.7333	58654
	5	68421			8.2367	77205			5.8	54773
	5.0333	72671			8.27	75395			5.8333	54072
	5.05	70307			8.3033	77016			5.8833	55722
	5.1167	74121			8.3367	77415			5.9	53977
	5.1333	80315			8.4033	78952			5.9333	48985
	5.1833	82015			8.4367	77517			5.9833	47265
	5.2333	88210			8.47	79353			6.0167	46984
	5.2833	82581			8.5033	79418			6.0833	48781
	5.3	79473			8.5533	76680			6.1	50871
	5.3333	80973			8.6033	76755			6.1333	49940
	5.4	82885			8.6367	77317			6.1833	48724
	5.4333	84201			8.6867	78656			6.2167	47463
	5.4833	79077			8.72	74427			6.2667	43589
	5.5167	83901			8.7533	77372			6.3	44165
	5.5833	82850			8.8033	75479			6.3333	44667
	5.6167	89956			8.8533	76383			6.3833	47393
	5.65	91960			8.8867	75061			6.4167	45947
	5.6833	1.0414e+05			8.92	78000			6.4667	41493
	5.7167	1.0400e+05			8.9533	75679			6.5	43276
	5.7833	1.0385e+05			9.0033	76598			6.5333	43838
	5.8167	1.0650e+05			9.0367	73919			6.5833	41342
	5.85	1.0299e+05			9.0867	77132			6.6167	42186
	5.8833	1.1069e+05			9.12	77254			6.65	39565
	5.9333	1.1000e+05			9.1867	76041			6.6833	42437
	5.9833	1.1415e+05			9.22	77728			6.7167	38760
	6.0167	1.1346e+05			9.2367	75831			6.7833	38020
	6.0667	1.1351e+05			9.3033	75126			6.8167	42040
	6.1	1.1079e+05			9.3367	75739			6.85	42059
	6.1333	1.0944e+05			9.4033	75219			6.8833	40357
	6.1833	1.2299e+05			9.42	75366			6.9167	39597
	6.2333	1.1845e+05			9.4867	78867			6.9833	41694
	6.2667	1.2644e+05			9.52	75596			7.0167	40761
	6.3	1.2390e+05			9.5867	76477			7.05	45807
	6.3333	1.2867e+05			9.6033	75662			7.0833	43233
	6.4	1.3451e+05			9.6367	75184			7.1167	44344
	6.4167	1.3599e+05			9.6867	75536			7.1667	48642
	6.4667	1.3282e+05			9.7367	75040			7.2	47587
	6.5167	1.3298e+05			9.7867	75541			7.25	45381
	6.5667	1.3713e+05			9.8033	76727			7.2833	54969
	6.6	1.3580e+05			9.87	75800			7.3167	51258
	6.6167	1.3407e+05			9.9033	76591			7.3667	48498
	6.6667	1.4296e+05			9.9367	76613			7.3833	51722
	6.7167	1.4776e+05			9.9867	75022			7.45	51755
	6.7667	1.4895e+05			10.02	74826			7.4833	51093
	6.7833	1.4668e+05			10.07	76002			7.5333	53422
	6.85	1.5018e+05			10.12	74535			7.5667	52562
	6.8833	1.5023e+05			10.153	73652			7.5833	51038
	6.9167	1.5119e+05			10.187	76067			7.65	49997
	6.9667	1.5223e+05			10.22	76471			7.6833	50441
	7	1.5614e+05			10.27	73863			7.7333	49239
	7.05	1.6020e+05			10.303	73067			7.75	48558
	7.0833	1.5977e+05			10.353	74670			7.7833	48647
	7.1167	1.5702e+05			10.387	74824			7.8333	51139
	7.15	1.6302e+05			10.42	76975			7.8667	51877
	7.2	1.6950e+05			10.487	74908			7.9	52716
	7.25	1.7122e+05			10.52	75529			7.95	52424
	7.2833	1.7405e+05			10.553	76758			7.9833	54465
	7.3333	1.8473e+05			10.587	74553			8.0333	54215
	7.3667	1.8383e+05			10.653	75368			8.0667	55198
	7.4	1.7936e+05			10.687	76408			8.1	52587
	7.4667	1.8273e+05			10.72	75216			8.15	54791
	7.5	1.8326e+05			10.77	76237			8.1833	54779
	7.55	1.8438e+05			10.803	75001			8.2333	56577
	7.5833	1.9066e+05			10.853	74994			8.2667	54434
	7.65	1.8546e+05			10.887	75473			8.3167	57152
	7.6833	1.9674e+05			10.903	73627			8.35	50537
	7.7167	1.9497e+05			10.97	75275			8.3833	54077
	7.75	1.9100e+05			11.003	75276			8.4333	52374
	7.7833	1.9235e+05			11.053	74637			8.4667	49657
	7.85	1.9578e+05			11.087	75035			8.5	53468
	7.8833	1.9538e+05			11.103	74352			8.5333	51283
	7.9	1.9649e+05			11.17	77462			8.5667	53817
	7.95	1.9872e+05			11.203	75527			8.6333	53493
	7.9833	2.0119e+05			11.253	75160			8.6667	53856
	8.05	2.0497e+05			11.27	74415			8.7	54473
	8.0833	2.0508e+05			11.337	74441			8.7333	55069
	8.1167	2.0092e+05			11.37	75930			8.7667	54674
	8.1667	2.0534e+05			11.403	75368			8.8333	54283
	8.2	2.1808e+05			11.453	76178			8.8667	54760
	8.25	2.1997e+05			11.47	73521			8.9	55024
	8.2833	2.2309e+05			11.537	74872			8.9333	56377
	8.3333	2.1916e+05			11.57	74019			8.9667	55767
	8.3667	2.2059e+05			11.603	76943			9.0167	52155
	8.4333	2.2973e+05			11.653	74269			9.05	53924
	8.45	2.2834e+05			11.687	74984			9.1	55172
	8.4833	2.2751e+05			11.753	75655			9.1333	54131
	8.5333	2.2586e+05			11.787	73485			9.1667	53159
	8.5667	2.1803e+05			11.837	74660			9.2167	53846
	8.6333	2.1792e+05			11.853	74538			9.25	53438
	8.65	2.1919e+05			11.903	74585			9.3	54047
	8.7167	2.1842e+05			11.953	75661			9.3333	52791
	8.75	2.2493e+05			11.987	74649			9.3667	53323
	8.7833	2.2751e+05			12.037	75604			9.4167	56860
	8.8333	2.2641e+05			12.07	76167			9.4333	57023
	8.85	2.2457e+05			12.12	75325			9.4833	56013
	8.9167	2.3386e+05			12.153	73373			9.5167	57228
	8.95	2.3741e+05			12.187	74580			9.5667	61076
	8.9833	2.3654e+05			12.237	76737			9.6167	62076
	9.0167	2.3921e+05			12.27	74118			9.6333	59443
	9.0667	2.3701e+05			12.32	74359			9.6833	56986
	9.1167	2.4435e+05			12.353	73417			9.7167	55311
	9.15	2.4163e+05			12.387	74736			9.75	57173
	9.2	2.4226e+05			12.437	74825			9.8	55810
	9.2333	2.5108e+05			12.47	74306			9.8333	57960
	9.2667	2.5271e+05			12.52	75149			9.8833	56183
	9.3333	2.5518e+05			12.553	74625			9.9167	57928
	9.3667	2.5746e+05			12.57	74410			9.95	57071
	9.4	2.6440e+05			12.637	75007			9.9833	58393
	9.4333	2.6569e+05			12.67	73934			10.017	57466
	9.4667	2.6448e+05			12.737	74548			10.05	58439
	9.5333	2.7113e+05			12.753	75688			10.117	61342
	9.5667	2.7011e+05			12.82	74236			10.15	61379
	9.6	2.7093e+05			12.853	73407			10.183	61805
	9.65	2.6922e+05			12.887	74763			10.217	62842
	9.7	2.7281e+05			12.937	74229			10.25	61677
	9.7333	2.6972e+05			12.97	72961			10.3	65288
	9.75	2.7697e+05			13.02	75435			10.333	66266
	9.8167	2.7498e+05			13.053	75889			10.367	65398
	9.85	2.7745e+05			13.12	75908			10.4	65639
	9.9	2.8876e+05			13.137	73913			10.433	66813
	9.9333	2.8714e+05			13.17	74720			10.483	66860
	9.95	2.9279e+05			13.237	74004			10.5	65904
	10.017	2.8858e+05			13.27	75346			10.533	68024
	10.05	2.9417e+05			13.32	75318			10.583	70212
	10.1	2.8541e+05			13.353	74866			10.6	69855
	10.133	2.8688e+05			13.403	76880			10.633	69070
	10.183	2.7941e+05			13.437	75611			10.683	65057
	10.233	2.7760e+05			13.47	73677			10.7	65475
	10.283	2.8545e+05			13.503	73585			10.733	64970
	10.317	2.9097e+05			13.553	73393			10.767	66778
	10.35	2.9000e+05			13.603	75870			10.8	67435
	10.4	2.9204e+05			13.637	75714			10.833	65651
	10.433	2.9606e+05			13.687	75296			10.883	64686
	10.483	2.9320e+05			13.72	73917			10.9	66324
	10.517	2.9643e+05			13.753	75756			10.917	65671
	10.55	2.9512e+05			13.803	75156			10.983	66065
	10.6	2.9993e+05			13.837	76722			11	66256
	10.633	3.0342e+05			13.887	74727			11.033	67824
	10.683	3.0481e+05			13.92	74995			11.083	68993
	10.717	3.0386e+05			13.953	74930			11.1	68474
	10.767	3.0581e+05			14.003	75207			11.133	69296
	10.8	3.0885e+05			14.037	74067			11.167	67886
	10.85	3.1409e+05			14.087	73627			11.2	66804
	10.883	3.1375e+05			14.12	72977			11.233	65027
	10.917	3.1298e+05			14.153	74934			11.283	64815
	10.967	3.2409e+05			14.203	74860			11.3	63194
	11.017	3.2270e+05			14.253	73999			11.333	64634
	11.05	3.2396e+05			14.287	74729			11.383	63924
	11.083	3.2491e+05			14.32	74266			11.4	64427
	11.117	3.2154e+05			14.37	74223			11.433	64041
	11.183	3.2281e+05			14.42	73813			11.467	63628
	11.217	3.2368e+05			14.437	75510			11.5	64819
	11.25	3.2537e+05			14.503	73334			11.517	64306
	11.283	3.2537e+05			14.537	72746			11.583	63822
	11.333	3.1953e+05			14.587	74069			11.617	64164
	11.383	3.2329e+05			14.62	74029			11.65	63468
	11.417	3.2240e+05			14.67	74786			11.667	63337
	11.467	3.2973e+05			14.703	74684			11.7	63190
	11.5	3.2705e+05			14.737	72936			11.75	65319
	11.533	3.3120e+05			14.803	74337			11.783	65375
	11.583	3.3502e+05			14.82	73361			11.8	67228
	11.617	3.3537e+05			14.87	72420			11.833	65706
	11.667	3.3509e+05			14.903	74629			11.867	65572
	11.7	3.3898e+05			14.937	74043			11.883	66510
	11.75	3.4099e+05			14.987	73665			11.917	69157
	11.8	3.3566e+05			15.02	74222			11.967	70145
	11.817	3.3993e+05			15.07	73829			12	70522
	11.867	3.4342e+05			15.12	74487			12.033	68467
	11.9	3.4410e+05			15.17	74505			12.067	69756
	11.967	3.4609e+05			15.187	73985			12.1	69727
	11.983	3.5198e+05			15.22	74582			12.15	68145
	12.017	3.4847e+05			15.287	75335			12.167	69742
	12.067	3.4895e+05			15.32	75058			12.2	70058
	12.1	3.4526e+05			15.353	72339			12.233	69786
	12.167	3.5118e+05			15.387	76431			12.25	67856
	12.183	3.5091e+05			15.453	73741			12.283	69160
	12.217	3.5332e+05			15.487	75375			12.317	68903
	12.267	3.5236e+05			15.52	76263			12.367	67746
	12.3	3.5906e+05			15.57	74123			12.4	68722
	12.35	3.5710e+05			15.603	74382			12.433	67076
	12.383	3.6059e+05			15.653	74320			12.467	67280
	12.417	3.6511e+05			15.703	75553			12.483	68779
	12.467	3.7074e+05			15.737	73411			12.55	68178
	12.5	3.7313e+05			15.77	74707			12.583	68667
	12.567	3.6472e+05			15.803	74107			12.583	67130
	12.583	3.6227e+05			15.87	73879			12.633	66071
	12.65	3.6235e+05			15.903	75385			12.667	66387
	12.667	3.6620e+05			15.937	75842			12.7	65771
	12.7	3.6255e+05			15.987	72999			12.75	67366
	12.75	3.5750e+05			16.02	73523			12.767	66917
	12.767	3.5915e+05			16.07	74730			12.783	67711
	12.8	3.5732e+05			16.103	74325			12.833	68323
	12.85	3.5696e+05			16.153	74717			12.867	69832
	12.883	3.5636e+05			16.187	76087			12.9	71463
	12.917	3.5687e+05			16.237	73725			12.95	71255
	12.95	3.5961e+05			16.27	74717			12.967	70698
	12.967	3.5466e+05			16.303	74971			13	69813
	13.033	3.6014e+05			16.353	75189			13.033	71315
	13.067	3.5700e+05			16.387	73261			13.067	70832
	13.083	3.5785e+05			16.453	74072			13.1	70337
	13.117	3.5578e+05			16.47	74863			13.133	72402
	13.15	3.5777e+05			16.537	74224			13.167	71866
	13.183	3.6048e+05			16.57	74431			13.183	73491
	13.233	3.6402e+05			16.603	75674			13.233	74845
	13.267	3.6527e+05			16.653	75915			13.267	75196
	13.283	3.6582e+05			16.687	76557			13.3	75774
	13.333	3.6070e+05			16.737	75516			13.333	76938
	13.35	3.5809e+05			16.77	72483			13.367	77137
	13.383	3.5946e+05			16.853	74994			13.383	79608
	13.433	3.6008e+05			16.87	73528			13.433	79233
	13.467	3.6805e+05			16.937	76063			13.467	78124
	13.467	3.6755e+05			16.97	75195			13.5	80628
	13.517	3.6353e+05			17.037	75550			13.533	80725
	13.55	3.6295e+05			17.053	74153			13.55	81927
	13.583	3.6029e+05			17.087	74222			13.617	80127
	13.633	3.6276e+05			17.153	73818			13.633	79342
	13.65	3.6351e+05			17.187	73638			13.667	77044
	13.683	3.6765e+05			17.22	72770			13.7	77739
	13.733	3.6122e+05			17.253	74131			13.733	77733
	13.75	3.6185e+05			17.32	73817			13.75	79108
	13.783	3.6771e+05			17.353	75107			13.783	78596
	13.833	3.6422e+05			17.387	74980			13.833	79240
	13.85	3.6472e+05			17.437	75429			13.85	82081
	13.917	3.6974e+05			17.487	74794			13.883	81987
	13.95	3.7087e+05			17.553	74691			13.917	82514
	13.967	3.7469e+05			17.587	74030			13.95	80629
	14.017	3.7229e+05			17.62	75806			13.983	78520
	14.033	3.7623e+05			17.653	74954			14.033	78831
	14.067	3.7277e+05			17.72	75113			14.05	79732
	14.117	3.7155e+05			17.753	74684			14.067	77803
	14.133	3.7564e+05			17.77	74804			14.117	78158
	14.167	3.7612e+05			17.837	74464			14.15	77307
	14.217	3.7534e+05			17.87	73782			14.183	77989
	14.233	3.7175e+05			17.937	74985			14.233	75348
	14.267	3.7499e+05			17.953	76037			14.25	75666
	14.317	3.7753e+05			18.02	73730			14.267	76591
	14.35	3.7635e+05			18.053	73830			14.317	76387
	14.383	3.7451e+05			18.12	75682			14.35	75544
	14.417	3.7628e+05			18.153	74834			14.367	74759
	14.45	3.7499e+05			18.203	75185			14.433	76201
	14.467	3.7159e+05			18.237	73960			14.45	73418
	14.517	3.7358e+05			18.27	75200			14.5	77394
	14.55	3.7214e+05			18.337	74399			14.533	77448
	14.6	3.7721e+05			18.353	75465			14.55	75533
	14.633	3.7646e+05			18.403	75139			14.6	77272
	14.65	3.7441e+05			18.437	74434			14.633	72729
	14.717	3.7419e+05			18.503	75747			14.633	73504
	14.75	3.7508e+05			18.52	73407			14.683	74739
	14.767	3.7229e+05			18.553	76260			14.717	76218
	14.8	3.7429e+05			18.62	76823			14.75	75599
	14.833	3.7624e+05			18.653	75944			14.8	78336
	14.867	3.7312e+05			18.703	75493			14.817	80693
	14.917	3.7881e+05			18.737	75471			14.833	82278
	14.933	3.7958e+05			18.787	74330			14.9	81448
	14.95	3.7951e+05			18.82	74522			14.933	80413
	15.017	3.7162e+05			18.853	74247			14.95	80685
	15.033	3.7378e+05			18.92	74288			15	78388
	15.1	3.7817e+05			18.937	74927			15.033	78872
	15.117	3.7942e+05			19.003	74521			15.083	75787
	15.133	3.7242e+05			19.037	75186			15.117	77055
	15.2	3.7706e+05			19.053	74961			15.15	78335
	15.217	3.8023e+05			19.103	75936			15.2	76283
	15.25	3.8134e+05			19.137	74899			15.233	77699
	15.3	3.8549e+05			19.187	75823			15.3	80653
	15.333	3.8335e+05			19.22	75707			15.333	79184
	15.35	3.8420e+05			19.237	74367			15.383	80659
	15.383	3.8860e+05			19.287	75362			15.417	80982
	15.417	3.8483e+05			19.303	75975			15.45	78716
	15.45	3.8466e+05			19.337	74482			15.5	83415
	15.5	3.7972e+05			19.387	73872			15.533	85112
	15.517	3.8347e+05			19.42	74220			15.583	86908
	15.533	3.8438e+05			19.453	75210			15.617	88081
	15.6	3.8755e+05			19.503	74915			15.683	94508
	15.633	3.8976e+05			19.52	74798			15.717	91591
	15.683	3.8780e+05			19.587	76143			15.767	90365
	15.7	3.8875e+05			19.603	74915			15.8	93130
	15.717	3.8574e+05			19.637	75338			15.833	92139
	15.783	3.8568e+05			19.687	75383			15.883	94895
	15.817	3.8683e+05			19.703	75466			15.933	94044
	15.833	3.8200e+05			19.737	74858			15.967	94577
	15.883	3.8144e+05			19.787	74446			16	94127
	15.9	3.8229e+05			19.82	75863			16.033	95645
	15.933	3.7988e+05			19.87	75975			16.083	93730
	16	3.7972e+05			19.887	74720			16.117	95932
	16.017	3.7530e+05			19.92	74851			16.167	95719
	16.067	3.7985e+05			19.97	75934			16.2	97705
	16.083	3.7955e+05			20.003	74604			16.233	97486
	16.117	3.8059e+05			20.02	73926			16.3	98730
	16.183	3.7845e+05			20.07	75981			16.317	98343
	16.2	3.8089e+05			20.103	74755			16.367	1.0147e+05
	16.233	3.8038e+05			20.137	74338			16.417	99354
	16.267	3.8009e+05			20.187	74537			16.467	1.0372e+05
	16.3	3.7789e+05			20.203	76077			16.483	1.0246e+05
	16.333	3.7466e+05			20.22	73750			16.517	1.0130e+05
	16.383	3.7259e+05			20.27	74770			16.567	1.0129e+05
	16.417	3.7309e+05			20.303	75558			16.6	99835
	16.433	3.7167e+05			20.37	75907			16.667	99064
	16.483	3.7207e+05			20.37	73844			16.683	1.0039e+05
	16.517	3.7020e+05			20.403	74489			16.717	99323
	16.567	3.7093e+05			20.47	75396			16.783	1.0036e+05
	16.583	3.7339e+05			20.487	74449			16.817	98577
	16.617	3.7451e+05			20.537	75405			16.85	1.0143e+05
	16.667	3.7467e+05			20.57	74772			16.9	1.0322e+05
	16.683	3.7513e+05			20.603	75087			16.95	1.0072e+05
	16.717	3.7340e+05			20.653	75340			16.983	1.0079e+05
	16.767	3.7787e+05			20.687	75895			17.017	98584
	16.8	3.8043e+05			20.72	74462			17.067	98399
	16.817	3.8177e+05			20.753	75637			17.1	99901
	16.867	3.8555e+05			20.787	74603			17.167	1.0268e+05
	16.9	3.8608e+05			20.803	74547			17.2	1.0364e+05
	16.933	3.8555e+05			20.87	75822			17.233	1.0110e+05
	16.983	3.8356e+05			20.887	76082			17.267	1.0107e+05
	17	3.8876e+05			20.92	77054			17.3	1.0043e+05
	17.05	3.9130e+05			20.97	75882			17.367	99615
	17.067	3.9137e+05			20.987	75270			17.4	99400
	17.1	3.9115e+05			21.037	75425			17.433	97358
	17.167	3.9062e+05			21.07	74990			17.483	98284
	17.183	3.8942e+05			21.103	74235			17.533	98645
	17.2	3.8841e+05			21.153	75559			17.567	95780
	17.25	3.8983e+05			21.17	74240			17.6	96155
	17.283	3.8827e+05			21.203	76758			17.65	96047
	17.317	3.8890e+05			21.253	75805			17.683	94471
	17.367	3.8656e+05			21.287	75703			17.75	95412
	17.383	3.8449e+05			21.303	74636			17.783	94483
	17.433	3.9003e+05			21.353	75060			17.833	92061
	17.467	3.8981e+05			21.387	75398			17.867	90314
	17.5	3.8728e+05			21.437	75436			17.933	90076
	17.55	3.8799e+05			21.47	75697			17.967	90952
	17.567	3.8705e+05			21.487	74447			17.983	95980
	17.6	3.9103e+05			21.537	74294			18.033	97444
	17.667	3.8463e+05			21.57	74693			18.083	97443
	17.683	3.8316e+05			21.587	74812			18.133	93515
	17.733	3.8689e+05			21.653	75807			18.15	94474
	17.75	3.8661e+05			21.67	74737			18.183	93058
	17.783	3.8427e+05			21.687	73904			18.25	91066
	17.833	3.8570e+05			21.737	75541			18.283	92821
	17.867	3.8353e+05			21.77	75798			18.35	89172
	17.9	3.8610e+05			21.803	74548			18.367	88902
	17.933	3.8520e+05			21.853	75261			18.417	88488
	17.95	3.8764e+05			21.87	75375			18.45	86331
	17.983	3.8832e+05			21.92	74460			18.5	85308
	18.05	3.8696e+05			21.953	75713			18.533	84687
	18.067	3.9002e+05			21.987	75013			18.567	85035
	18.1	3.8978e+05			22.053	74189			18.617	84030
	18.133	3.9019e+05			22.07	75220			18.65	83126
	18.167	3.9340e+05			22.137	76048			18.7	82115
	18.183	3.9326e+05			22.17	75154			18.733	79984
	18.233	3.9664e+05			22.237	75461			18.767	79767
	18.267	3.9701e+05			22.27	75583			18.817	81196
	18.3	3.9779e+05			22.337	75452			18.867	77737
	18.333	3.9743e+05			22.37	75326			18.9	75568
	18.367	3.9872e+05			22.42	75509			18.933	76641
	18.417	3.9336e+05			22.437	74632			18.967	74172
	18.45	3.9821e+05			22.487	74834			19.033	72401
	18.483	4.0179e+05			22.537	75477			19.067	75471
	18.517	3.9991e+05			22.587	75446			19.1	75544
	18.55	4.0412e+05			22.62	74461			19.15	73777
	18.583	4.0243e+05			22.653	75011			19.2	70133
	18.633	4.0144e+05			22.72	76285			19.25	72313
	18.65	4.0216e+05			22.753	75832			19.267	70746
	18.667	4.0174e+05			22.803	73839			19.317	70866
	18.717	4.0646e+05			22.837	75717			19.367	70494
	18.75	4.0710e+05			22.87	75174			19.417	70833
	18.783	4.0867e+05			22.92	73998			19.45	72036
	18.833	4.1250e+05			22.97	74802			19.5	71795
	18.85	4.1385e+05			23.003	75059			19.533	73541
	18.867	4.1719e+05			23.053	75127			19.6	73300
	18.933	4.1119e+05			23.103	75563			19.633	72619
	18.967	4.1384e+05			23.137	74721			19.65	71918
	19.017	4.1067e+05			23.153	74827			19.7	70938
	19.033	4.0931e+05			23.22	75242			19.733	73289
	19.067	4.0969e+05			23.253	76976			19.8	75458
	19.117	4.1087e+05			23.32	74940			19.833	76199
	19.15	4.1202e+05			23.353	74400			19.85	71916
	19.183	4.1226e+05			23.387	73906			19.917	68322
	19.233	4.1004e+05			23.437	76070			19.95	69835
	19.25	4.1117e+05			23.503	74020			20	70187
	19.267	4.1094e+05			23.537	74895			20.033	70306
	19.333	4.1019e+05			23.553	75460			20.083	68785
	19.367	4.1185e+05			23.62	74525			20.133	68312
	19.417	4.1085e+05			23.67	76162			20.167	69297
	19.433	4.1334e+05			23.72	74395			20.2	74414
	19.45	4.1443e+05			23.787	76366			20.233	74568
	19.517	4.0997e+05			23.82	75733			20.3	74135
	19.533	4.0689e+05			23.853	75911			20.333	74093
	19.567	4.1265e+05			23.903	75466			20.383	75483
	19.6	4.1177e+05			23.953	75478			20.417	74694
	19.633	4.1223e+05			24.003	76631			20.45	74241
	19.7	4.1299e+05			24.053	75884			20.5	73609
	19.717	4.1178e+05			24.087	75896			20.533	72901
	19.75	4.1647e+05			24.12	76438			20.583	72014
	19.783	4.2117e+05			24.187	75357			20.617	71957
	19.817	4.1602e+05			24.22	75776			20.683	72113
	19.833	4.2051e+05			24.253	76458			20.717	70672
	19.9	4.2173e+05			24.303	75139			20.767	72635
	19.917	4.2353e+05			24.337	75597			20.8	73650
	19.95	4.2158e+05			24.403	75855			20.833	74639
	20	4.1887e+05			24.437	75473			20.883	73152
	20.033	4.1920e+05			24.487	74002			20.933	72038
	20.05	4.1969e+05			24.52	75424			20.967	68153
	20.117	4.1433e+05			24.587	75074			21	69792
	20.15	4.1390e+05			24.62	75322			21.033	70079
	20.183	4.1470e+05			24.67	75100			21.1	70465
	20.217	4.1391e+05			24.703	74388			21.133	70912
	20.25	4.1062e+05			24.77	73982			21.183	71446
	20.3	4.1728e+05			24.803	74634			21.217	71338
	20.333	4.1999e+05			24.837	74575			21.267	70984
	20.35	4.1919e+05			24.887	73793			21.317	69962
	20.4	4.1494e+05			24.92	74776			21.317	68048
	20.433	4.1651e+05			24.987	74079			21.383	69748
	20.45	4.1476e+05			25.02	75372			21.417	69582
	20.5	4.0370e+05			25.07	75410			21.483	70869
	20.533	4.0517e+05			25.103	74615			21.5	70687
	20.583	4.0056e+05			25.17	74692			21.55	66833
	20.6	4.0758e+05			25.203	76381			21.583	70671
	20.633	4.1329e+05			25.22	74490			21.617	71068
	20.683	4.1455e+05			25.27	74060			21.683	69859
	20.717	4.1238e+05			25.32	75025			21.7	67916
	20.733	4.1725e+05			25.37	75404			21.75	66680
	20.783	4.1667e+05			25.403	74858			21.783	68976
	20.817	4.1856e+05			25.453	75312			21.833	70331
	20.833	4.1413e+05			25.487	74786			21.867	67282
	20.9	4.1210e+05			25.537	76038			21.9	69659
	20.9	4.1460e+05			25.57	74684			21.95	71900
	20.933	4.1359e+05			25.62	74482			22	73854
	20.983	4.1524e+05			25.67	73961			22.05	74720
	21.017	4.1433e+05			25.703	76017			22.067	73827
	21.05	4.1475e+05			25.753	75858			22.117	71071
	21.083	4.1398e+05			25.787	75240			22.167	72587
	21.117	4.1862e+05			25.853	74240			22.2	73232
	21.167	4.1135e+05			25.887	75573			22.25	74045
	21.2	4.1462e+05			25.953	75099			22.267	74755
	21.217	4.1610e+05			25.97	75565			22.3	75948
	21.267	4.1244e+05			26.003	74381			22.367	79422
	21.283	4.0641e+05			26.07	72746			22.4	83156
	21.317	4.0255e+05			26.103	74251			22.45	81984
	21.383	4.0866e+05			26.153	74003			22.483	79575
	21.4	4.0942e+05			26.187	75646			22.533	80318
	21.433	4.0843e+05			26.253	74163			22.567	83129
	21.467	4.1242e+05			26.287	73575			22.617	80164
	21.5	4.1457e+05			26.337	75302			22.65	82705
	21.533	4.1513e+05			26.37	74823			22.683	85206
	21.583	4.0986e+05			26.403	75398			22.75	91704
	21.617	4.0908e+05			26.47	73446			22.783	93963
	21.633	4.1058e+05			26.503	74202			22.8	96344
	21.683	4.0887e+05			26.553	74532			22.85	97844
	21.7	4.1447e+05			26.587	73363			22.883	96415
	21.767	4.1161e+05			26.653	73313			22.95	98044
	21.8	4.0743e+05			26.687	74439			22.983	94931
	21.817	4.0860e+05			26.72	74417			23.033	96145
	21.867	4.1034e+05			26.753	74838			23.067	98445
	21.883	4.1403e+05			26.803	73350			23.1	95132
	21.917	4.1369e+05			26.87	74240			23.15	97469
	21.967	4.1815e+05			26.887	74311			23.167	98507
	22	4.1971e+05			26.953	74658			23.233	96320
	22.017	4.2254e+05			27.003	75610			23.267	97366
	22.067	4.1988e+05			27.053	75037			23.333	97142
	22.1	4.2021e+05			27.087	75272			23.35	99409
	22.167	4.2419e+05			27.137	76185			23.383	1.0016e+05
	22.2	4.2399e+05			27.187	74653			23.45	98679
	22.2	4.2183e+05			27.237	74964			23.483	98350
	22.267	4.2869e+05			27.27	75271			23.533	95382
	22.283	4.3056e+05			27.32	74948			23.567	96763
	22.317	4.4319e+05			27.353	75304			23.617	99191
	22.367	4.4585e+05			27.42	73010			23.65	1.0030e+05
	22.383	4.4072e+05			27.453	76138			23.683	99509
	22.433	4.3475e+05			27.503	74360			23.733	1.0075e+05
	22.467	4.3976e+05			27.553	74749			23.767	1.0089e+05
	22.5	4.4103e+05			27.587	74099			23.817	1.0107e+05
	22.55	4.4356e+05			27.62	75825			23.867	1.0242e+05
	22.717	4.4054e+05			27.653	74189			23.917	1.0277e+05
	22.75	4.3739e+05			27.72	74014			23.933	1.0256e+05
	22.783	4.3986e+05			27.753	74984			23.983	1.0198e+05
	22.833	4.4600e+05			27.803	75914			24.033	1.0651e+05
	22.867	4.4136e+05			27.853	74475			24.067	1.0926e+05
	22.9	4.4273e+05			27.903	74404			24.117	1.0867e+05
	22.933	4.4531e+05			27.937	74896			24.15	1.0525e+05
	22.967	4.4460e+05			27.987	75329			24.2	1.0802e+05
	23	4.4405e+05			28.037	74282			24.25	1.0778e+05
	23.05	4.3990e+05			28.07	75399			24.283	1.0590e+05
	23.083	4.4164e+05			28.137	74875			24.317	1.0459e+05
	23.1	4.3977e+05			28.17	74346			24.35	1.0710e+05
	23.15	4.4172e+05			28.22	74599			24.417	1.0751e+05
	23.167	4.4096e+05			28.253	74904			24.45	1.0565e+05
	23.233	4.3800e+05			28.32	74754			24.483	1.0889e+05
	23.25	4.3822e+05			28.353	74912			24.517	1.1155e+05
	23.283	4.3959e+05			28.403	74753			24.567	1.1368e+05
	23.333	4.3764e+05			28.437	75140			24.617	1.1184e+05
	23.367	4.4279e+05			28.503	75594			24.65	1.1266e+05
	23.4	4.3931e+05			28.537	76364			24.7	1.1261e+05
	23.45	4.4213e+05			28.553	75250			24.733	1.1311e+05
	23.483	4.4192e+05			28.62	76282			24.767	1.1200e+05
	23.517	4.3963e+05			28.653	75010			24.817	1.0994e+05
	23.55	4.3707e+05			28.72	74593			24.85	1.0779e+05
	23.567	4.3514e+05			28.737	75589			24.917	1.0996e+05
	23.633	4.3375e+05			28.803	73904			24.95	1.1179e+05
	23.667	4.3965e+05			28.837	74641			25	1.1174e+05
	23.683	4.3810e+05			28.903	74281			25.033	1.1214e+05
	23.733	4.3470e+05			28.937	75518			25.083	1.1124e+05
	23.767	4.3680e+05			28.987	76047			25.117	1.1331e+05
	23.817	4.3365e+05			29.037	73978			25.167	1.1140e+05
	23.833	4.3704e+05			29.087	75804			25.217	1.1004e+05
	23.867	4.3457e+05			29.12	74175			25.233	1.1176e+05
	23.917	4.3872e+05			29.17	75057			25.283	1.1018e+05
	23.95	4.4046e+05			29.22	74318			25.333	1.1136e+05
	23.983	4.4545e+05			29.253	74992			25.383	1.1084e+05
	24.033	4.3932e+05			29.303	74759			25.4	1.1191e+05
	24.05	4.3974e+05			29.337	76587			25.433	1.1051e+05
	24.1	4.3785e+05			29.403	75014			25.5	1.1093e+05
	24.133	4.3310e+05			29.437	74936			25.533	1.0913e+05
	24.167	4.3603e+05			29.487	74224			25.583	1.0780e+05
	24.217	4.4116e+05			29.52	75210			25.617	1.0448e+05
	24.233	4.3925e+05			29.587	75455			25.683	1.0746e+05
	24.25	4.4297e+05			29.62	74682			25.717	1.0552e+05
	24.3	4.4023e+05			29.67	74463			25.75	1.0746e+05
	24.35	4.3644e+05			29.703	75326			25.783	1.0962e+05
	24.383	4.3590e+05			29.77	76266			25.817	1.0896e+05
	24.433	4.3714e+05			29.803	75365			25.883	1.0774e+05
	24.45	4.3688e+05			29.853	73563			25.917	1.0764e+05
	24.5	4.3343e+05			29.887	76170			25.95	1.0436e+05
	24.533	4.3062e+05			29.937	75734			25.983	1.0657e+05
	24.55	4.3205e+05			29.987	75521			26.017	1.0484e+05
	24.6	4.3975e+05			30.037	75999			26.083	1.0351e+05
	24.617	4.3934e+05			30.087	75079			26.117	1.0638e+05
	24.65	4.3748e+05			30.12	75869			26.15	1.0546e+05
	24.7	4.3471e+05			30.187	75363			26.183	1.0702e+05
	24.733	4.3526e+05			30.22	74863			26.233	1.0708e+05
	24.767	4.3096e+05			30.27	74756			26.283	1.1039e+05
	24.8	4.2897e+05			30.303	73908			26.317	1.1220e+05
	24.833	4.3269e+05			30.37	73832			26.367	1.0935e+05
	24.867	4.3795e+05			30.403	74219			26.4	1.1097e+05
	24.917	4.3187e+05			30.453	73644			26.45	1.1203e+05
	24.95	4.3073e+05			30.487	74455			26.483	1.1182e+05
	24.983	4.3405e+05			30.553	73831			26.517	1.1107e+05
	25.017	4.3532e+05			30.587	74574			26.567	1.0995e+05
	25.05	4.3487e+05			30.62	75046			26.6	1.0983e+05
	25.1	4.3284e+05			30.67	73957			26.65	1.1143e+05
	25.133	4.3448e+05			30.72	76326			26.7	1.1064e+05
	25.167	4.3262e+05			30.77	74615			26.717	1.1307e+05
	25.2	4.2963e+05			30.803	74548			26.767	1.0941e+05
	25.217	4.3070e+05			30.87	75387			26.8	1.0680e+05
	25.25	4.3088e+05			30.903	75913			26.867	1.0492e+05
	25.3	4.3151e+05			30.953	75028			26.883	1.0743e+05
	25.333	4.2929e+05			31.003	75011			26.917	1.0368e+05
	25.367	4.3053e+05			31.053	74763			26.983	1.0242e+05
	25.417	4.2904e+05			31.087	73476			27.017	1.0134e+05
	25.433	4.2804e+05			31.153	74487			27.067	1.0079e+05
	25.5	4.3136e+05			31.17	73852			27.083	1.0192e+05
	25.517	4.3238e+05			31.237	74834			27.15	1.0065e+05
	25.55	4.3924e+05			31.287	75201			27.183	1.0529e+05
	25.6	4.3499e+05			31.337	73817			27.217	1.0664e+05
	25.617	4.3363e+05			31.37	74539			27.267	1.0521e+05
	25.683	4.3305e+05			31.403	75240			27.3	1.0477e+05
	25.717	4.3692e+05			31.47	75269			27.35	1.0581e+05
	25.733	4.3675e+05			31.503	73471			27.383	1.0405e+05
	25.783	4.3668e+05			31.553	74924			27.45	1.0245e+05
	25.817	4.4221e+05			31.587	74807			27.467	1.0331e+05
	25.833	4.4844e+05			31.653	76000			27.5	1.0261e+05
	25.9	4.4171e+05			31.687	73342			27.55	1.0062e+05
	25.917	4.4075e+05			31.737	74905			27.6	1.0004e+05
	25.967	4.4090e+05			31.77	74524			27.633	99776
	26	4.4168e+05			31.837	74126			27.667	98171
	26.033	4.4485e+05			31.87	73998			27.7	1.0130e+05
	26.083	4.4400e+05			31.887	75722			27.767	1.0080e+05
	26.1	4.4579e+05			31.953	74067			27.8	98131
	26.133	4.4432e+05			31.987	75925			27.85	1.0058e+05
	26.183	4.4755e+05			32.053	74920			27.883	98920
	26.217	4.4906e+05			32.087	77412			27.933	95933
	26.267	4.5100e+05			32.137	74292			27.967	98891
	26.283	4.4786e+05			32.187	76449			28.017	1.0059e+05
	26.317	4.4784e+05			32.237	75727			28.05	1.0098e+05
	26.383	4.4682e+05			32.27	75761			28.083	1.0255e+05
	26.417	4.5101e+05			32.32	74867			28.15	99314
	26.467	4.4559e+05			32.37	74564			28.183	98779
	26.5	4.4614e+05			32.437	74789			28.233	1.0181e+05
	26.567	4.4737e+05			32.453	76005			28.267	98477
	26.6	4.4121e+05			32.52	74812			28.333	1.0044e+05
	26.65	4.3843e+05			32.553	76290			28.367	98422
	26.683	4.4033e+05			32.62	76101			28.383	1.0042e+05
	26.717	4.4297e+05			32.637	74058			28.45	97938
	26.783	4.4667e+05			32.72	75097			28.483	98400
	26.817	4.4736e+05			32.753	75506			28.533	97223
	26.867	4.4531e+05			32.82	75240			28.55	95446
	26.9	4.4712e+05			32.837	75060			28.617	97820
	26.967	4.4402e+05			32.887	74713			28.633	98229
	27	4.4306e+05			32.937	75771			28.683	93785
	27.033	4.4298e+05			33.003	77104			28.733	95210
	27.083	4.4032e+05			33.037	74069			28.75	93452
	27.117	4.4302e+05			33.07	75597			28.8	89904
	27.167	4.4584e+05			33.137	74118			28.85	92323
	27.217	4.4653e+05			33.17	73553			28.883	91136
	27.25	4.4404e+05			33.22	75536			28.933	86558
	27.283	4.4505e+05			33.27	74278			28.967	88528
	27.35	4.4371e+05			33.337	75093			29.017	89616
	27.383	4.4333e+05			33.37	74667			29.067	90848
	27.433	4.4021e+05			33.42	75129			29.117	87894
	27.467	4.3984e+05			33.453	76726			29.133	87678
	27.5	4.4421e+05			33.52	74971			29.167	87802
	27.567	4.4732e+05			33.553	74653			29.233	88640
	27.583	4.5112e+05			33.603	74650			29.267	89766
	27.65	4.5377e+05			33.653	75293			29.3	88912
	27.683	4.5334e+05			33.703	75789			29.333	91073
	27.75	4.5162e+05			33.753	75747			29.4	88720
	27.767	4.4855e+05			33.787	76955			29.433	88046
	27.833	4.5032e+05			33.837	75372			29.467	85747
	27.867	4.4766e+05			33.903	75172			29.5	82397
	27.9	4.4995e+05			33.937	74755			29.533	81740
	27.95	4.4760e+05			33.987	75576			29.6	84221
	27.983	4.4942e+05			34.037	75590			29.633	81414
	28.05	4.4335e+05			34.103	74921			29.667	84254
	28.083	4.4548e+05			34.12	76299			29.717	84817
	28.133	4.4757e+05			34.187	75984			29.75	87731
	28.167	4.4470e+05			34.237	75818			29.817	85564
	28.217	4.4487e+05			34.287	74849			29.85	86766
	28.267	4.4652e+05			34.32	74577			29.883	87197
	28.3	4.4806e+05			34.387	76339			29.933	82910
	28.333	4.5520e+05			34.42	74916			29.967	84558
	28.367	4.5335e+05			34.487	74665			30.017	83574
	28.433	4.5336e+05			34.503	75557			30.05	84883
	28.467	4.4936e+05			34.57	76312			30.1	87611
	28.517	4.4460e+05			34.603	75230			30.133	85475
	28.55	4.4772e+05			34.653	75025			30.183	87561
	28.583	4.4907e+05			34.687	74752			30.217	84667
	28.65	4.4012e+05			34.737	75030			30.25	87481
	28.683	4.3877e+05			34.803	74615			30.3	85152
	28.733	4.3500e+05			34.837	74772			30.333	86242
	28.767	4.3451e+05			34.887	73994			30.4	87506
	28.833	4.3503e+05			34.92	74361			30.417	88981
	28.867	4.3373e+05			34.987	75552			30.483	86508
	28.917	4.2903e+05			35.037	74349			30.517	88215
	28.95	4.3262e+05			35.103	73363			30.55	90179
	29.017	4.2347e+05			35.17	75468			30.6	90123
	29.05	4.2855e+05			35.203	74696			30.633	91768
	29.067	4.3586e+05			35.253	76145			30.683	97427
	29.133	4.3259e+05			35.287	74438			30.733	99565
	29.2	4.3521e+05			35.32	76184			30.783	95553
	29.25	4.3080e+05			35.387	75665			30.8	93775
	29.267	4.3453e+05			35.42	75297			30.867	97234
	29.317	4.3574e+05			35.487	75366			30.9	95988
	29.367	4.3119e+05			35.537	75140			30.933	97755
	29.417	4.2946e+05			35.587	74331			30.983	1.0054e+05
	29.45	4.2724e+05			35.62	74131			31.017	98677
	29.5	4.3169e+05			35.67	73364			31.067	1.0103e+05
	29.533	4.3063e+05			35.72	74360			31.1	1.0022e+05
	29.567	4.3191e+05			35.787	74141			31.133	1.0158e+05
	29.633	4.3661e+05			35.803	74356			31.183	1.0561e+05
	29.65	4.3704e+05			35.87	74395			31.217	1.0552e+05
	29.717	4.3278e+05			35.92	75130			31.283	1.0081e+05
	29.75	4.3660e+05			35.97	73989			31.317	1.0062e+05
	29.817	4.3433e+05			36.003	74755			31.35	1.0103e+05
	29.85	4.3537e+05			36.07	75421			31.383	99684
	29.9	4.3697e+05			36.103	75121			31.433	99766
	29.95	4.3959e+05			36.153	74972			31.483	98995
	30	4.3748e+05			36.203	75460			31.517	1.0184e+05
	30.033	4.4540e+05			36.27	75122			31.567	99888
	30.1	4.4756e+05			36.32	75134			31.6	97003
	30.133	4.5140e+05			36.353	73724			31.65	1.0163e+05
	30.183	4.5451e+05			36.403	74526			31.7	1.0037e+05
	30.217	4.5294e+05			36.453	73947			31.717	96561
	30.25	4.5167e+05			36.503	73594			31.783	96671
	30.317	4.4936e+05			36.553	74937			31.817	98861
	30.35	4.4672e+05			36.587	74411			31.867	1.0547e+05
	30.4	4.4647e+05			36.653	74222			31.9	1.0315e+05
	30.433	4.4547e+05			36.703	74633			31.95	1.0281e+05
	30.5	4.4383e+05			36.753	75014			31.983	1.0099e+05
	30.533	4.4592e+05			36.787	73267			32.017	1.0228e+05
	30.583	4.4868e+05			36.853	75260			32.083	1.0523e+05
	30.633	4.4865e+05			36.887	74584			32.1	1.0567e+05
	30.683	4.4437e+05			36.953	74768			32.167	1.0538e+05
	30.733	4.4558e+05			36.987	75003			32.2	1.0870e+05
	30.767	4.5001e+05			37.053	74758			32.25	1.0997e+05
	30.817	4.4873e+05			37.087	75576			32.267	1.0722e+05
	30.867	4.5193e+05			37.153	73809			32.3	1.0841e+05
	30.917	4.4637e+05			37.187	74203			32.367	1.0981e+05
	30.933	4.5415e+05			37.253	74742			32.4	1.1106e+05
	30.983	4.5052e+05			37.27	74737			32.45	1.0938e+05
	31.033	4.5122e+05			37.337	75725			32.483	1.1140e+05
	31.083	4.5740e+05			37.387	74946			32.533	1.1313e+05
	31.117	4.5768e+05			37.453	74626			32.567	1.1501e+05
	31.167	4.5054e+05			37.47	75249			32.6	1.1415e+05
	31.2	4.5224e+05			37.537	74738			32.65	1.1431e+05
	31.233	4.5231e+05			37.57	75455			32.683	1.1605e+05
	31.3	4.4246e+05			37.637	74059			32.75	1.2238e+05
	31.317	4.5107e+05			37.653	75225			32.783	1.2070e+05
	31.383	4.4533e+05			37.72	75884			32.833	1.1897e+05
	31.433	4.4592e+05			37.77	76728			32.867	1.2233e+05
	31.483	4.4553e+05			37.82	75629			32.9	1.2089e+05
	31.517	4.5045e+05			37.853	75269			32.95	1.1753e+05
	31.583	4.4693e+05			37.92	74186			32.983	1.1742e+05
	31.617	4.5279e+05			37.953	75082			33.033	1.1789e+05
	31.667	4.4902e+05			38.02	76106			33.067	1.1674e+05
	31.7	4.5339e+05			38.053	75543			33.117	1.2074e+05
	31.767	4.5611e+05			38.12	75345			33.15	1.1400e+05
	31.8	4.5836e+05			38.153	74751			33.2	1.1575e+05
	31.85	4.5630e+05			38.203	74676			33.233	1.1413e+05
	31.883	4.5799e+05			38.253	75204			33.267	1.1492e+05
	31.917	4.5895e+05			38.32	74895			33.333	1.1315e+05
	31.983	4.5136e+05			38.353	75711			33.367	1.1384e+05
	32.033	4.5499e+05			38.403	76025			33.383	1.1338e+05
	32.067	4.5613e+05			38.453	74796			33.433	1.1385e+05
	32.117	4.5590e+05			38.503	75088			33.483	1.1396e+05
	32.167	4.4921e+05			38.553	74899			33.533	1.1177e+05
	32.2	4.4999e+05			38.603	75227			33.567	1.1392e+05
	32.25	4.4664e+05			38.653	76011			33.617	1.1042e+05
	32.3	4.4337e+05			38.72	73276			33.65	1.1130e+05
	32.35	4.3385e+05			38.753	75294			33.683	1.1208e+05
	32.4	4.3547e+05			38.803	74285			33.733	1.1098e+05
	32.433	4.3083e+05			38.837	75110			33.767	1.1455e+05
	32.467	4.3025e+05			38.903	76279			33.817	1.1663e+05
	32.533	4.2885e+05			38.953	74749			33.867	1.1399e+05
	32.583	4.3193e+05			39.003	75290			33.917	1.1561e+05
	32.6	4.3144e+05			39.053	75418			33.95	1.1384e+05
	32.667	4.2937e+05			39.12	75438			33.967	1.1259e+05
	32.7	4.2841e+05			39.137	75354			34.017	1.1459e+05
	32.767	4.2650e+05			39.203	75507			34.05	1.1203e+05
	32.783	4.2453e+05			39.237	75473			34.117	1.1169e+05
	32.833	4.2583e+05			39.303	75870			34.133	1.1195e+05
	32.883	4.2971e+05			39.337	76051			34.167	1.1290e+05
	32.933	4.2571e+05			39.403	75314			34.233	1.0940e+05
	32.967	4.2633e+05			39.453	75718			34.267	1.0938e+05
	33	4.2729e+05			39.503	75489			34.317	1.0883e+05
	33.05	4.2617e+05			39.537	75803			34.333	1.0730e+05
	33.1	4.2519e+05			39.603	74482			34.367	1.0739e+05
	33.15	4.2468e+05			39.67	75754			34.417	1.0843e+05
	33.183	4.2297e+05			39.703	76024			34.45	1.0808e+05
	33.25	4.2661e+05			39.77	75590			34.5	1.0977e+05
	33.283	4.2804e+05			39.803	75712			34.533	1.0813e+05
	33.35	4.2478e+05			39.87	75033			34.6	1.0905e+05
	33.367	4.2484e+05			39.887	76088			34.633	1.1052e+05
	33.433	4.2939e+05			39.937	75964			34.667	1.0938e+05
	33.467	4.2820e+05			40.003	76344			34.7	1.1145e+05
	33.533	4.2954e+05			40.037	75567			34.75	1.0993e+05
	33.55	4.2977e+05			40.087	75636			34.817	1.1161e+05
	33.583	4.2859e+05			40.12	76724			34.85	1.1000e+05
	33.65	4.3200e+05			40.187	75396			34.883	1.0812e+05
	33.683	4.3635e+05			40.237	76286			34.933	1.1094e+05
	33.733	4.4727e+05			40.287	74851			34.967	1.0850e+05
	33.767	4.4687e+05			40.32	75783			35.017	1.0969e+05
	33.833	4.5273e+05			40.387	75474			35.05	1.1023e+05
	33.867	4.4673e+05			40.437	74215			35.1	1.1073e+05
	33.917	4.4989e+05			40.487	75486			35.133	1.1053e+05
	33.95	4.4924e+05			40.52	75052			35.183	1.0645e+05
	34	4.4963e+05			40.587	76101			35.217	1.0789e+05
	34.05	4.5069e+05			40.62	74798			35.25	1.0638e+05
	34.083	4.5233e+05			40.687	76042			35.3	1.0478e+05
	34.117	4.5330e+05			40.72	76875			35.333	1.0256e+05
	34.15	4.5241e+05			40.787	74502			35.383	1.0202e+05
	34.217	4.4935e+05			40.837	74600			35.433	1.0135e+05
	34.25	4.5357e+05			40.887	75854			35.45	98986
	34.267	4.5373e+05			40.953	75755			35.5	1.0034e+05
	34.317	4.4927e+05			40.987	75122			35.533	98419
	34.367	4.5293e+05			41.037	77058			35.6	1.0065e+05
	34.417	4.5920e+05			41.07	75780			35.617	1.0066e+05
	34.45	4.5639e+05			41.153	77003			35.683	97779
	34.5	4.5560e+05			41.17	76105			35.717	96479
	34.533	4.5790e+05			41.237	75246			35.75	97433
	34.567	4.5300e+05			41.287	75015			35.8	98743
	34.633	4.4740e+05			41.353	76364			35.833	96566
	34.65	4.5298e+05			41.37	75452			35.883	95767
	34.7	4.5494e+05			41.437	76125			35.917	93016
	34.733	4.4765e+05			41.47	75455			35.983	94789
	34.767	4.4443e+05			41.537	75815			36	92571
	34.817	4.4435e+05			41.57	75570			36.033	89827
	34.833	4.4325e+05			41.637	74707			36.083	87954
	34.9	4.4214e+05			41.67	76696			36.117	85007
	34.933	4.4629e+05			41.737	75897			36.167	83043
	35	4.4845e+05			41.77	76163			36.2	84013
	35.017	4.4714e+05			41.837	76594			36.267	83408
	35.05	4.4933e+05			41.87	75383			36.3	81239
	35.1	4.5064e+05			41.92	75407			36.333	82060
	35.15	4.5092e+05			41.97	74138			36.367	84101
	35.2	4.5502e+05			42.02	77001			36.417	82534
	35.217	4.5231e+05			42.07	76180			36.467	78950
	35.283	4.5856e+05			42.12	75237			36.5	76937
	35.317	4.5924e+05			42.17	76439			36.55	79044
	35.35	4.5990e+05			42.237	76520			36.583	79816
	35.4	4.5881e+05			42.27	76658			36.617	76143
	35.433	4.6144e+05			42.32	76084			36.683	76747
	35.483	4.6225e+05			42.353	75856			36.717	73505
	35.517	4.6611e+05			42.42	76109			36.75	72854
	35.55	4.7052e+05			42.47	75472			36.783	69992
	35.6	4.7026e+05			42.52	75715			36.817	69102
	35.633	4.6938e+05			42.57	76766			36.883	65009
	35.7	4.7134e+05			42.637	76708			36.917	63248
	35.733	4.7123e+05			42.653	76704			36.967	64320
	35.767	4.7172e+05			42.72	76390			37	59326
	35.8	4.7437e+05			42.77	77562			37.05	56438
	35.85	4.7900e+05			42.837	76645			37.083	58462
	35.9	4.7411e+05			42.87	76379			37.1	56887
	35.933	4.7623e+05			42.92	77787			37.167	55036
[truncated: 10,490 more rows]

## Sheet: Fig. 3e
	Fn - GSSG - DTT											Fn pull series											Fn - DTT
[truncated: 12,299 more rows]

[truncated: 13 more sheets: Fig. 3g, Fig. 4c, Fig. 4d, Fig. 4f, Fig. 4g, SFig. 1c, SFig. 2, SFig. 3, SFig. 4, SFig. 5a, SFig. 5b, SFig. 7b, SFig. 8b]
