# Supplementary material for: Glutathionylation of fibronectin records mechanical history, priming an integrin switch and myofibroblast polarization
Source: Research Square preprint supplement (doi:10.21203/rs.3.rs-468701/v1), 2021-05-11
Supplement: Supplementary file 3 [file f33a12cd509501a582a02105.xlsx]

## Sheet: Sheet1
UID	Protein names	Protein Type	#PSM and percentage in all protein	#Unique Peptides	#Glutathionylation sites	Glutathionylation Sequence (c is modified site)	#Glutathionylated peptide PSM	Cys-GSH modified percentage
P02751	Fibronectin	ECM	2107 (59.62%)	149	1	RITTTPTNGQQGNSLEEVVHADQSScTF	2	1
A0A024R1N1	Myosin	Cytoskeleton	786 (22.24%)	70	1	KKLEEEQIILEDQNcKL	8	1
P62736	Actin	Cytoskeleton	449 (12.71%)	12	1	cKAGFAGDDAPRAVF	1	1
P0CG39	POTE ankyrin domain family member J	ECM	150 (4.24%)	2	1	GMEScGIHETTF	1	0.0714
A0A024R326	60S ribosomal protein L29	Ribosome	7 (0.2%)	3	1	RLcRPKAKAKAKDQTKAQAAAPASVPAQAPKRTQAPTKASE	1	1
P33897	ATP-binding cassette sub-family D member 1	Endoplasmic reticulum	5 (0.14%)	5	1	VRQcLAPARGLQAPAGEPTQEASGVAAAKAGmNRVF	1	1
O75376	Nuclear receptor corepressor 1	Nucleus	4 (0.11%)	3	2	QHRAAVIPPmVScTPcNIPIGTPVSGYALY	1	0.5
Q6ZRT9	cDNA FLJ46112 fis, clone TESTI2035962	Cell-relate	3 (0.08%)	3	1	SSSRLWRVPRPcAAAPCARRSSPPGTSTPAPTCVPL	1	0.3333
P10070	Zinc finger protein GLI2	Nucleus	3 (0.08%)	3	1	MQQLRQPVAGSQcPGMTTTMSPHACYGQVHPQL	1	1
F5H619	HEAT repeat-containing protein 5A	Cell-relate	3 (0.08%)	3	1	QNILNGLGAAAAPcHRDVY	1	1
B3KMC9	5'-3' exoribonuclease	Nucleus	3 (0.08%)	3	2	PSIIVNcVEEKPKEcNGVKIPVDASKPNPNDVEFDNL	1	1
X5JRV1	MHC class I	Plasma Membrane	2 (0.08%)	2	2	GAVmAVVMcRRKSSGGKGGSYSQAASSNSAQGSDESLIAcK	1	1
Q99698	Lysosomal	Cytoskeleton	2 (0.06%)	2	1	ISVSRDGTcIIW	1	1
Q8TF62	Probable phospholipid-transporting ATPase IM	Plasma membrane	2 (0.06%)	2	1	SNGHVVcEKKQQL	1	1
Q14934	Nuclear factor of activated T-cells	Nucleus	2 (0.06%)	2	1	ESQPARSVRLGGPGGGAGGAGGGRVLEcPSIRITSISPTPEPPAAL	1	1
H3BTE0	Polycystin-1	Cell-relate	2 (0.06%)	2	1	RQLRcGPAPGLRRCCGHPGQQQPCGRAASAAQL	1	1
B4DLJ5	cDNA FLJ55716	Plasma Membrane	2 (0.06%)	2	1	TFTIFENcRVGTTVGQVCATDKDEPDTMHTRL	1	1
A0A096LNH6	Dedicator of cytokinesis protein 1	Cytosol/nucleus	2 (0.06%)	2	1	VNLKNVVcKIGEDAEVLMSL	1	1
